# Supplementary material for: Design, Synthesis, and Anti-PVY Biological Activity of 1,3,5-Triazine Derivatives Containing Piperazine Structure
Source: MDPI journal article supplement (doi:10.3390/ijms24098280), 2023-05-05
Supplement: s1 [file s1]

## Supplementary Information

# Design, Synthesis, And Anti-PVY Biological Activity of 1,3,5-Triazine Derivatives Containing Piperazine Structure

Lian Bai, Chunle Wei, Jian Zhang \*, Runjiang Song\*

Center for R&D of Fine Chemicals of Guizhou University, Key Laboratory of Green Pesticide and Agricultural Bi-oengineering, Ministry of Education, National Key Laboratory of Green Pesticide, Guiyang 550025, China; 15885174719@163.com (L.B.); weichle@163.com (C.W.)

\* Correspondence: jianzhang@gzu.edu.cn (J.Z.); songrj@gzu.edu.cn (R.S.)

## Table of Contents

|                                                                            |       |
|----------------------------------------------------------------------------|-------|
| 1. Characterizations of products.....                                      | 3–23  |
| 2. $^1\text{H}$ , $^{13}\text{C}$ , $^{19}\text{F}$ NMR and HRMS data..... | 24–80 |

### Characterization of target products (C1-C35)

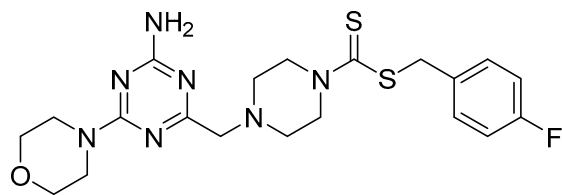

**4-fluorobenzyl-4-((4-amino-6-morpholino-1,3,5-triazin-2-yl)methyl)piperazine-1-carbodithioate (C1):** Yield: 77.29%; white solid; m. p. 78.1-78.9 °C;  $^1\text{H}$  NMR (500 MHz,  $\text{DMSO}-d_6$ )  $\delta$  7.39 (dd,  $J = 8.7, 5.5$  Hz, 2H, Ar-H), 7.10 (t,  $J = 8.9$  Hz, 2H, Ar-H), 6.84 (d,  $J = 58.4$  Hz, 2H,  $-\text{NH}_2$ ), 4.49 (s, 2H,  $-\text{S}-\text{CH}_2$ ), 4.02 (d,  $J = 178.4$  Hz, 4H, Piperazine-H), 3.61 (d,  $J = 5.0$  Hz, 4H, Morpholine-H), 3.56 – 3.52 (m, 4H,  $-\text{CH}_2-\text{O}-\text{CH}_2-$ ), 3.27 (s, 2H,  $-\text{CH}_2-\text{N}-$ ), 2.58 (s, 4H, Piperazine-H).  $^{13}\text{C}$  NMR (126 MHz,  $\text{DMSO}-d_6$ )  $\delta$  194.85, 174.19, 167.30, 165.10, 162.92, 160.98, 133.20, 131.74, 131.68, 115.86, 115.69, 66.46 (2), 63.41 (2), 52.51 (2), 51.68, 50.30, 40.28. HRMS (ESI): Calculated for  $\text{C}_{20}\text{H}_{27}\text{FN}_7\text{OS}_2$  [ $\text{M} + \text{H}$ ] $^+$ : 464.16970, found: 464.16843.

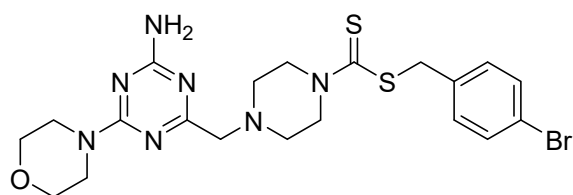

**4-bromobenzyl-4-((4-amino-6-morpholino-1,3,5-triazin-2-yl)methyl)piperazine-1-carbodithioate (C2):** Yield: 84.16%; white solid; m. p. 113.2-114.0 °C;  $^1\text{H}$  NMR (500 MHz,  $\text{DMSO}-d_6$ )  $\delta$  7.46 (d,  $J = 8.1$  Hz, 2H, Ar-H), 7.30 (d,  $J = 8.3$  Hz, 2H, Ar-H), 6.84 (d,  $J = 56.4$  Hz, 2H,  $-\text{NH}_2$ ), 4.49 (s, 2H,  $-\text{S}-\text{CH}_2$ ), 4.0

2 (d,  $J = 174.2$  Hz, 4H, Piperazine-H), 3.67 – 3.59 (m, 4H, Morpholine-H), 3.54 (t,  $J = 4.8$  Hz, 4H,  $-\text{CH}_2\text{-O-CH}_2-$ ), 3.27 (s, 2H,  $-\text{CH}_2\text{-N-}$ ), 2.59 (s, 4H, Piperazine-H).  $^{13}\text{C}$  NMR (126 MHz,  $\text{DMSO-}d_6$ )  $\delta$  194.69, 174.18, 167.30, 165.10, 136.75, 131.88 (2), 131.84 (2), 120.96, 66.46 (2), 63.39 (2), 52.50 (2), 51.80, 50.33, 43.61, 40.64. HRMS (ESI): Calculated for  $\text{C}_{20}\text{H}_{27}\text{BrN}_7\text{OS}_2$   $[\text{M}+\text{H}]^+$  : 524.08964, found: 524.08820.

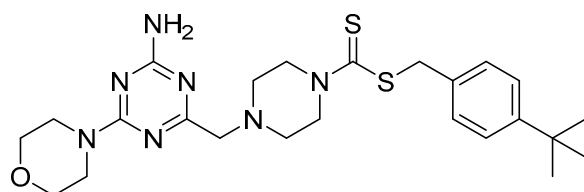

**4-(tert-butyl)benzyl 4-((4-amino-6-morpholino-1,3,5-triazin-2-yl)methyl)piperazine-1-carbodithioate (C3):** Yield: 84.03%; white solid; m. p. 171.3-171.6 °C;  $^1\text{H}$  NMR (500 MHz,  $\text{DMSO-}d_6$ )  $\delta$  7.27 (q,  $J = 8.0$  Hz, 4H, Ar-H), 6.84 (d,  $J = 57.7$  Hz, 2H,  $-\text{NH}_2$ ), 4.43 (s, 2H,  $-\text{S-CH}_2$ ), 4.01 (d,  $J = 181.5$  Hz, 4H, 4H, Piperazine-H), 3.61 (s, 4H, Morpholine-H), 3.57 – 3.50 (m, 4H, 4H,  $-\text{CH}_2\text{-O-CH}_2-$ ), 3.27 (s, 2H,  $-\text{CH}_2\text{-N-}$ ), 2.58 (s, 4H, Piperazine-H), 1.21 (s, 9H,  $-\text{C}(\text{CH}_3)_3$ ).  $^{13}\text{C}$  NMR (126 MHz,  $\text{DMSO-}d_6$ )  $\delta$  195.14, 174.20, 167.30, 165.10, 150.38, 133.57, 129.49 (2), 125.79 (2), 66.46 (2), 63.41 (2), 52.50 (2), 51.59, 50.24, 43.62, 41.03, 34.76, 31.62 (3). HRMS (ESI): Calculated for  $\text{C}_{24}\text{H}_{36}\text{N}_7\text{OS}_2$   $[\text{M}+\text{H}]^+$  : 502.24173, found: 502.24008.

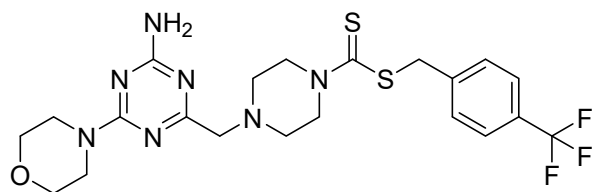

**4-(trifluoromethyl)benzyl-4-((4-amino-6-morpholino-1,3,5-triazin-2-yl)methyl)piperazine-1-carbodithioate (C4):** Yield: 71.84%; white solid; m. p. 114.8-115.4 °C; <sup>1</sup>H NMR (500 MHz, DMSO-*d*<sub>6</sub>) δ 7.64 (d, *J* = 8.1 Hz, 2H, Ar-H), 7.57 (d, *J* = 8.5 Hz, 2H, Ar-H), 6.84 (d, *J* = 55.1 Hz, 2H, -NH<sub>2</sub>), 4.62 (s, 2H, -S-CH<sub>2</sub>), 4.03 (d, *J* = 168.4 Hz, 4H, Piperazine-H), 3.66 – 3.59 (m, 4H, Morpholine-H), 3.56 – 3.51 (m, 4H, -CH<sub>2</sub>-O-CH<sub>2</sub>-), 3.27 (s, 2H, -CH<sub>2</sub>-N-), 2.60 (s, 4H, Piperazine-H). <sup>13</sup>C NMR (126 MHz, DMSO-*d*<sub>6</sub>) δ 194.48, 174.19, 167.30, 165.10, 142.48, 130.44, 128.21, 125.79, 125.74, 123.69, 66.45 (2), 63.38 (2), 52.50 (2), 51.95, 50.39, 43.62, 40.14. HRMS (ESI): Calculated for C<sub>21</sub>H<sub>27</sub>F<sub>3</sub>N<sub>7</sub>OS<sub>2</sub> [M+H]<sup>+</sup> : 514.16651, found: 514.16497.

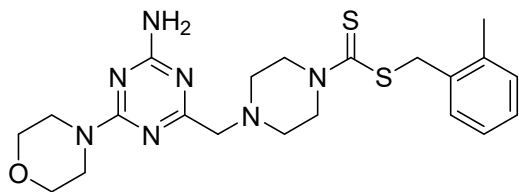

**2-methylbenzyl-4-((4-amino-6-morpholino-1,3,5-triazin-2-yl)methyl)piperazine-1-carbodithioate (C5):** Yield: 94.73%; white solid; m. p. 138.4-138.7 °C; <sup>1</sup>H NMR (400 MHz, DMSO-*d*<sub>6</sub>) δ 7.36 (d, *J* = 7.1 Hz, 1H, Ar-H), 7.24 – 7.18 (m, 2H, Ar-H), 7.15 (dd, *J* = 7.5, 4.2 Hz, 1H, Ar-H), 6.88 (d, *J* = 39.4 Hz, 2H, -NH<sub>2</sub>), 4.46 (s, 2H, 2H, -S-CH<sub>2</sub>), 4.06 (d, *J* = 147.7 Hz, 4H, Piperazine-H), 3.66 (d, *J* = 4.2 Hz, 4H, Morpholine-H), 3.61 – 3.56 (m, 4H, -CH<sub>2</sub>-O-CH<sub>2</sub>-), 3.33 (s, 2H, -CH<sub>2</sub>-N-), 2.64 (s, 4H, Piperazine-H), 2.32 (s, 3H, -Ar-CH<sub>3</sub>). <sup>13</sup>C NMR (101 MHz, DMSO-*d*<sub>6</sub>) δ 194.95, 174.08, 167.22, 165.03, 137.33, 133.88, 130.76, 130.67, 128.30, 126.59, 66.40 (2), 63.31 (2), 52.44 (2), 51.33, 50.18, 43.

55, 40.12, 19.34. HRMS (ESI): Calculated for  $C_{21}H_{30}N_7OS_2$   $[M+H]^+$  : 460.19478, found: 460.19312.

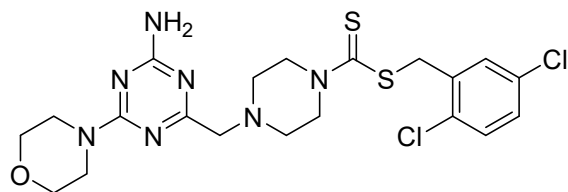

**2,5-dichlorobenzyl-4-((4-amino-6-morpholino-1,3,5-triazin-2-yl)methyl)piperazine-1-carbodithioate (C6):** Yield: 69.37%; white solid; m. p. 138.4-138.7 °C;  $^1H$  NMR (500 MHz,  $DMSO-d_6$ )  $\delta$  7.63 (d,  $J$  = 2.6 Hz, 1H, Ar-H), 7.47 (d,  $J$  = 8.6 Hz, 1H, Ar-H), 7.37 (dd,  $J$  = 8.6, 2.7 Hz, 1H, Ar-H), 6.86 (d,  $J$  = 64.3 Hz, 2H, -NH<sub>2</sub>), 4.56 (s, 2H, -S-CH<sub>2</sub>), 4.02 (d,  $J$  = 172.5 Hz, 4H, Piperazine-H), 3.61 (s, 4H, Morpholine-H), 3.54 (d,  $J$  = 4.8 Hz, 4H, -CH<sub>2</sub>-O-CH<sub>2</sub>-), 3.27 (s, 2H, -CH<sub>2</sub>-N-), 2.59 (s, 4H, Piperazine-H).  $^{13}C$  NMR (126 MHz,  $DMSO-d_6$ )  $\delta$  193.96, 174.16, 167.29, 165.08, 136.71, 132.76, 132.18, 131.61, 131.51, 129.80, 66.45 (2), 63.39 (2), 52.49 (2), 51.82, 50.45, 43.58, 38.67. HRMS (ESI): Calculated for  $C_{20}H_{26}Cl_2N_7OS_2$   $[M+H]^+$  : 514.10118, found: 514.09973.

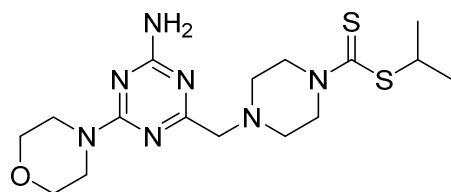

**Isobutyl-4-((4-amino-6-morpholino-1,3,5-triazin-2-yl)methyl)piperazine-1-carbodithioate (C7):** Yield: 76.43%; white solid; m. p. 139.6-139.9 °C;  $^1H$  NMR (500 MHz,  $DMSO-d_6$ )  $\delta$  6.88 (d,  $J$  = 63.6 Hz, 2H, -NH<sub>2</sub>), 4.21 (s, 2H, Pipera

zine-H), 3.95 – 3.89 (m, 1H, -CH(CH<sub>3</sub>)<sub>2</sub>), 3.89 – 3.81 (m, 2H, Piperazine-H), 3.66 (s, 4H, Morpholine-H), 3.60 – 3.57 (m, 4H, -CH<sub>2</sub>-O-CH<sub>2</sub>-), 3.34 (s, 2H, -CH<sub>2</sub>-N-), 2.61 (t, *J* = 5.1 Hz, 4H, Piperazine-H), 1.35 (d, *J* = 6.9 Hz, 6H, -CH(CH<sub>3</sub>)<sub>2</sub>). <sup>13</sup>C NMR (126 MHz, DMSO-*d*<sub>6</sub>) δ 194.97, 174.21, 167.30, 165.10, 66.46 (2), 63.41 (2), 52.49 (2), 50.96, 50.20, 43.61, 42.43, 23.01 (2). HRMS (ESI): Calculated for C<sub>17</sub>H<sub>30</sub>N<sub>7</sub>OS<sub>2</sub> [M+H]<sup>+</sup>: 412.19478, found: 412.19423.

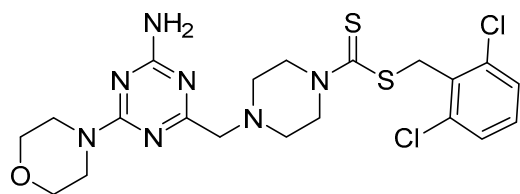

**2,6-dichlorobenzyl-4-((4-amino-6-morpholino-1,3,5-triazin-2-yl)methyl)piperazine-1-carbodithioate (C8):**

Yield: 87.98%; white solid; m. p. 123.0-123.3 °C; <sup>1</sup>H NMR (400 MHz, DMSO-*d*<sub>6</sub>) δ 7.52 (d, *J* = 7.7 Hz, 2H, Ar-H), 7.39 (dd, *J* = 8.7, 7.4 Hz, 1H, Ar-H), 6.88 (d, *J* = 39.5 Hz, 2H, -NH<sub>2</sub>), 4.61 (s, 2H, -S-CH<sub>2</sub>), 4.05 (d, *J* = 157.8 Hz, 4H, Piperazine-H), 3.67 (s, 4H, Morpholine-H), 3.61 – 3.57 (m, 4H, -CH<sub>2</sub>-O-CH<sub>2</sub>-), 3.33 (s, 2H, -CH<sub>2</sub>-N-), 2.64 (d, *J* = 12.9 Hz, 4H, Piperazine-H). <sup>13</sup>C NMR (101 MHz, DMSO-*d*<sub>6</sub>) δ 193.92, 174.13, 167.23, 165.03, 135.87 (2), 131.18, 130.93, 129.25 (2), 66.40 (2), 63.29 (2), 52.36 (2), 51.36, 50.35, 43.56, 38.43. HRMS (ESI): Calculated for C<sub>20</sub>H<sub>26</sub>Cl<sub>2</sub>N<sub>7</sub>OS<sub>2</sub> [M+H]<sup>+</sup>: 514.10118, found: 514.09967.

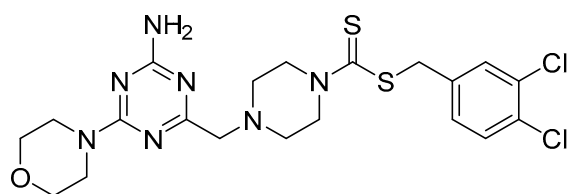

**3,4-dichlorobenzyl-4-((4-amino-6-morpholino-1,3,5-triazin-2-yl)methyl)piperazine-1-carbodithioate (C9):** Yield: 66.19%; white solid; m. p. 94.4-95.1 °C; <sup>1</sup>H NMR (500 MHz, DMSO-*d*<sub>6</sub>) δ 7.66 (d, *J* = 2.2 Hz, 1H, Ar-H), 7.57 (d, *J* = 8.6 Hz, 1H, Ar-H), 7.38 (dd, *J* = 8.1, 2.2 Hz, 1H, Ar-H), 7.04 – 6.72 (m, 2H, -NH<sub>2</sub>), 4.57 (s, 2H, -S-CH<sub>2</sub>), 4.06 (d, *J* = 170.2 Hz, 4H, Piperazine-H), 3.65 (s, 4H, Morpholine-H), 3.58 (d, *J* = 4.7 Hz, 4H, -CH<sub>2</sub>-O-CH<sub>2</sub>-), 3.31 (s, 2H, -CH<sub>2</sub>-N-), 2.63 (s, 4H, Piperazine-H). <sup>13</sup>C NMR (126 MHz, DMSO-*d*<sub>6</sub>) δ 194.36, 174.17, 167.29, 165.09, 138.88, 131.52, 131.35, 131.05, 130.38, 130.02, 66.46 (2), 63.38 (2), 52.50 (2), 51.93, 50.40, 43.60, 39.38. HRMS (ESI): Calculated for C<sub>20</sub>H<sub>26</sub>Cl<sub>2</sub>N<sub>7</sub>OS<sub>2</sub> [M+H]<sup>+</sup>: 514.10118, found: 514.09967.

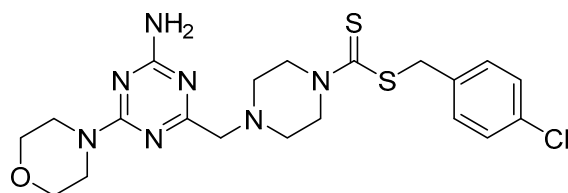

**4-chlorobenzyl-4-((4-amino-6-morpholino-1,3,5-triazin-2-yl)methyl)piperazine-1-carbodithioate (C10):** Yield: 89.44%; white solid; m. p. 75.3-75.6 °C; <sup>1</sup>H NMR (500 MHz, DMSO-*d*<sub>6</sub>) δ 7.41 (d, *J* = 8.6 Hz, 2H, Ar-H), 7.36 (d, *J* = 8.5 Hz, 2H, Ar-H), 6.88 (d, *J* = 58.4 Hz, 2H, -NH<sub>2</sub>), 4.54 (s, 2H, -S-CH<sub>2</sub>), 4.06 (d, *J* = 175.1 Hz, 4H, Piperazine-H), 3.65 (t, *J* = 4.7 Hz, 4H, Morpholine-H), 3.58 (t, *J* = 4.7 Hz, 4H, -CH<sub>2</sub>-O-CH<sub>2</sub>-), 3.31 (s, 2H, -CH<sub>2</sub>-N-), 2.63 (s, 4H, Piperazine-H). <sup>13</sup>C NMR (126 MHz, DMSO-*d*<sub>6</sub>) δ 194.70, 174.17, 167.29, 165.09, 136.29, 132.46, 131.54 (2), 128.92 (2), 66.46 (2), 63.39 (2), 52.50 (2), 51.78, 50.32, 43.60, 40.62. HRMS (ESI): Calculated for C<sub>20</sub>H<sub>27</sub>ClN<sub>7</sub>OS<sub>2</sub> [M+H]<sup>+</sup>: 480.14015, found: 480.13867.



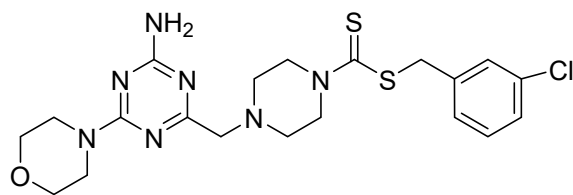

**3-chlorobenzyl-4-((4-amino-6-morpholino-1,3,5-triazin-2-yl)methyl)piperazine-1-carbodithioate (C11):** Yield: 98.15%; white solid; m. p. 113.4-114.0 °C;  $^1\text{H}$  NMR (500 MHz, DMSO- $d_6$ )  $\delta$  7.42 (s, 1H, Ar-H), 7.32 – 7.27 (m, 3H, Ar-H), 6.85 (d,  $J$  = 60.1 Hz, 2H, -NH<sub>2</sub>), 4.52 (s, 2H, -S-CH<sub>2</sub>), 4.03 (d,  $J$  = 172.3 Hz, 4H, Piperazine-H), 3.62 (s, 4H, Morpholine-H), 3.55 (d,  $J$  = 4.8 Hz, 4H, -CH<sub>2</sub>-O-CH<sub>2</sub>-), 3.28 (s, 2H, 2H, -CH<sub>2</sub>-N-), 2.59 (s, 4H, Piperazine-H).  $^{13}\text{C}$  NMR (101 MHz, DMSO- $d_6$ )  $\delta$  195.72, 174.34, 166.93, 164.86, 138.36, 134.30, 129.80, 129.39, 127.70, 127.55, 66.72 (2), 63.60 (2), 52.73 (2), 51.24, 49.73, 43.49, 41.23. HRMS (ESI): Calculated for C<sub>20</sub>H<sub>27</sub>ClN<sub>7</sub>OS<sub>2</sub> [M+H]<sup>+</sup>: 480.14015, found: 480.13855.

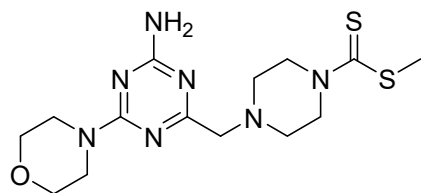

**Methyl-4-((4-amino-6-morpholino-1,3,5-triazin-2-yl)methyl)piperazine-1-carbodithioate (C12):** Yield: 83.12%; white solid; m. p. 174.6-174.9 °C;  $^1\text{H}$  NMR (500 MHz, DMSO- $d_6$ )  $\delta$  6.84 (d,  $J$  = 60.6 Hz, 2H, -NH<sub>2</sub>), 4.02 (d,  $J$  = 167.6 Hz, 4H, Piperazine-H), 3.62 (s, 4H, Morpholine-H), 3.57 – 3.53 (m, 4H, -CH<sub>2</sub>-O-CH<sub>2</sub>-), 3.27 (s, 2H, -CH<sub>2</sub>-N-), 2.59 (t,  $J$  = 5.1 Hz, 4H, Piperazine-H), 2.52 (s, 3H, -S-CH<sub>3</sub>).  $^{13}\text{C}$  NMR (126 MHz, DMSO- $d_6$ )  $\delta$  196.69, 174.19, 167.29, 165.

10, 66.46 (2), 63.45 (2), 52.50 (2), 51.61, 50.14, 43.60, 20.00. HRMS (ESI):

Calculated for  $C_{14}H_{24}N_7OS_2$   $[M+H]^+$ : 370.14783, found: 370.14648.

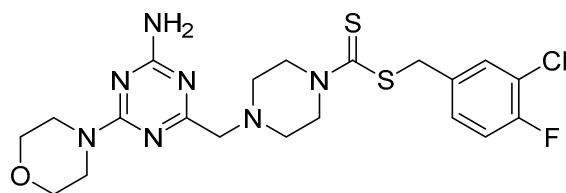

**3-chloro-4-fluorobenzyl-4-((4-amino-6-morpholino-1,3,5-triazin-2-yl)methyl)piperazine-1-carbodithioate (C13):** Yield: 71.11%; white solid; m. p. 115.4-115.8 °

C;  $^1H$  NMR (500 MHz, DMSO- $d_6$ )  $\delta$  7.63 (dd,  $J$  = 7.3, 2.2 Hz, 1H, Ar-H), 7.

42 (ddd,  $J$  = 8.6, 4.8, 2.3 Hz, 1H, Ar-H), 7.36 (t,  $J$  = 8.9 Hz, 1H, Ar-H), 6.9

1 (d,  $J$  = 62.6 Hz, 2H, -NH<sub>2</sub>), 4.56 (s, 2H, -S-CH<sub>2</sub>), 4.07 (d,  $J$  = 173.8 Hz,

4H, Piperazine-H), 3.66 (s, 4H, Morpholine-H), 3.59 (d,  $J$  = 4.4 Hz, 4H, -CH<sub>2</sub>

-O-CH<sub>2</sub>-), 3.32 (s, 2H, -CH<sub>2</sub>-N-), 2.63 (s, 4H, Piperazine-H).  $^{13}C$  NMR (126

MHz, DMSO- $d_6$ )  $\delta$  194.45, 174.17, 167.29, 165.08, 157.93, 155.97, 135.43, 13

5.40, 131.60, 130.44, 130.38, 119.76, 119.62, 117.45, 117.29, 66.45 (2), 63.40

(2), 52.50 (2), 51.83, 50.36, 43.58, 39.44. HRMS (ESI): Calculated for  $C_{20}H_{26}$

$ClFN_7OS_2$   $[M+H]^+$ : 498.13073, found: 498.12903.

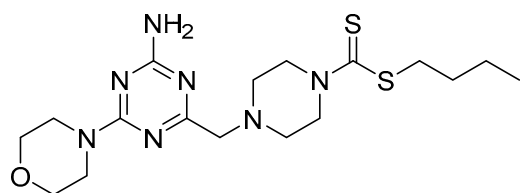

**Butyl-4-((4-amino-6-morpholino-1,3,5-triazin-2-yl)methyl)piperazine-1-carbodit**

**hioate (C14):** Yield: 73.05%; white solid; m. p. 117.6-118.3 °C;  $^1H$  NMR (40

0 MHz, DMSO- $d_6$ )  $\delta$  6.89 (d,  $J$  = 43.8 Hz, 2H, -NH<sub>2</sub>), 4.23 (s, 4H, Piperazin

e-H), 3.66 (d,  $J$  = 3.8 Hz, 4H, Morpholine-H), 3.62 – 3.55 (m, 4H, -CH<sub>2</sub>-O-C

H<sub>2</sub>-), 3.32 (s, 2H, -CH<sub>2</sub>-N-), 3.23 (t, *J* = 7.4 Hz, 2H, -S-CH<sub>2</sub>-), 2.63 (t, *J* = 5.1 Hz, 4H, Piperazine-H), 1.67 – 1.53 (m, 2H, -CH<sub>2</sub>-CH<sub>2</sub>-), 1.37 (h, *J* = 7.3 Hz, 2H, -CH<sub>2</sub>-CH<sub>3</sub>), 0.89 (t, *J* = 7.3 Hz, 3H, -CH<sub>2</sub>-CH<sub>3</sub>). <sup>13</sup>C NMR (101 MHz, DMSO-*d*<sub>6</sub>) δ 195.68, 174.12, 167.22, 165.02, 66.40 (2), 63.35 (2), 52.43 (2), 51.38, 50.13, 43.54, 36.37, 30.90, 21.99, 14.02. HRMS (ESI): Calculated for C<sub>17</sub>H<sub>30</sub>N<sub>7</sub>OS<sub>2</sub> [M+H]<sup>+</sup>: 412.19478, found: 412.09315.

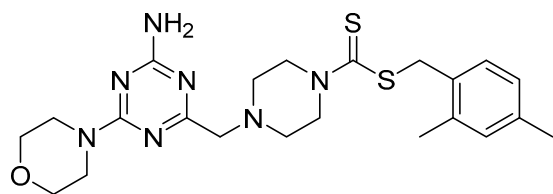

**2,4-dimethylbenzyl 4-((4-amino-6-morpholino-1,3,5-triazin-2-yl)methyl)piperazine-1-carbodithioate (C15):** Yield: 68.19%; white solid; m. p. 110.0-110.7 °C; <sup>1</sup>H NMR (500 MHz, DMSO-*d*<sub>6</sub>) δ 7.13 (d, *J* = 1.8 Hz, 1H, Ar-H), 7.09 – 7.04 (m, 2H, Ar-H), 7.01 – 6.80 (m, 2H, -NH<sub>2</sub>), 4.41 (s, 2H, -S-CH<sub>2</sub>), 4.05 (d, *J* = 185.6 Hz, 4H, Piperazine-H), 3.65 (s, 4H, Morpholine-H), 3.58 (d, *J* = 4.4 Hz, 4H, -CH<sub>2</sub>-O-CH<sub>2</sub>-), 3.36 (s, 2H, -CH<sub>2</sub>-N-), 2.60 (s, 4H, Piperazine-H), 2.17 (s, 6H, Ar-CH<sub>3</sub>). <sup>13</sup>C NMR (126 MHz, DMSO-*d*<sub>6</sub>) δ 195.16, 174.19, 167.29, 165.08, 136.84, 135.95, 133.61, 130.86, 130.09, 127.19, 66.46 (2), 63.43 (2), 52.51 (2), 51.48, 50.20, 43.58, 41.37, 19.87, 19.59. HRMS (ESI): Calculated for C<sub>22</sub>H<sub>32</sub>N<sub>7</sub>OS<sub>2</sub> [M+H]<sup>+</sup>: 474.21043, found: 474.20868.

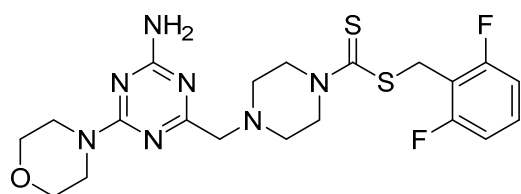

**2,6-difluorobenzyl-4-((4-amino-6-morpholino-1,3,5-triazin-2-yl)methyl)piperazine-1-carbodithioate (C16):** Yield: 62.17%; white solid; m. p. 152.0-152.3 °C; <sup>1</sup>H NMR (500 MHz, DMSO-*d*<sub>6</sub>) δ 7.40 (tt, *J* = 8.5, 6.6 Hz, 1H, Ar-H), 7.10 (t, *J* = 8.0 Hz, 2H, Ar-H), 6.84 (d, *J* = 61.3 Hz, 2H, -NH<sub>2</sub>), 4.43 (s, 2H, -S-CH<sub>2</sub>), 4.19 (s, 4H, Piperazine-H), 3.61 (d, *J* = 4.5 Hz, 4H, Morpholine-H), 3.55 (d, *J* = 5.0 Hz, 4H, -CH<sub>2</sub>-O-CH<sub>2</sub>-), 3.28 (s, 2H, -CH<sub>2</sub>-N-), 2.65 – 2.55 (m, 4H, Piperazine-H). <sup>13</sup>C NMR (126 MHz, DMSO-*d*<sub>6</sub>) δ 193.85, 174.20, 167.30, 165.09, 162.41, 162.35, 160.43, 160.37, 131.20, 131.12, 131.04, 112.43, 112.40, 112.27, 112.24, 111.70, 111.55, 111.39, 66.45 (2), 63.33 (2), 52.42 (2), 51.53, 50.34, 43.61, 29.16. HRMS (ESI): Calculated for C<sub>20</sub>H<sub>26</sub>F<sub>2</sub>N<sub>7</sub>OS<sub>2</sub> [M+H]<sup>+</sup>: 482.16028, found: 482.15860.

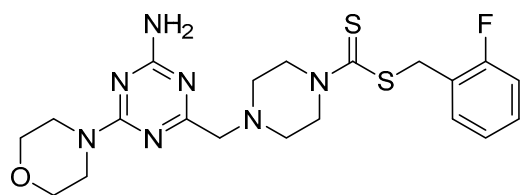

**2-fluorobenzyl-4-((4-amino-6-morpholino-1,3,5-triazin-2-yl)methyl)piperazine-1-carbodithioate (C17):** Yield: 77.18%; white solid; m. p. 115.4-115.9 °C; <sup>1</sup>H NMR (500 MHz, DMSO-*d*<sub>6</sub>) δ 7.47 (td, *J* = 7.8, 1.9 Hz, 1H, Ar-H), 7.30 (tdd, *J* = 7.6, 5.4, 1.8 Hz, 1H, Ar-H), 7.18 – 7.10 (m, 2H, Ar-H), 6.86 (d, *J* = 66.7 Hz, 2H, -NH<sub>2</sub>), 4.48 (s, 2H, -S-CH<sub>2</sub>), 4.19 (s, 4H, Piperazine-H), 3.61 (s, 4H, Morpholine-H), 3.54 (d, *J* = 4.8 Hz, 4H, -CH<sub>2</sub>-O-CH<sub>2</sub>-), 3.27 (s, 2H, -CH<sub>2</sub>-N-), 2.58 (s, 4H, Piperazine-H). <sup>13</sup>C NMR (126 MHz, DMSO-*d*<sub>6</sub>) δ 194.39, 174.19, 167.29, 165.08, 161.99, 160.03, 132.11, 132.08, 130.38, 130.31, 125.08, 125.05, 123.62, 123.50, 116.01, 115.84, 66.45 (2), 63.40 (2), 52.49 (2), 51.64, 5

0.31, 43.59, 34.74. HRMS (ESI): Calculated for C<sub>20</sub>H<sub>27</sub>N<sub>7</sub>OS<sub>2</sub> [M+H]<sup>+</sup>: 464.16970, found: 464.16809.

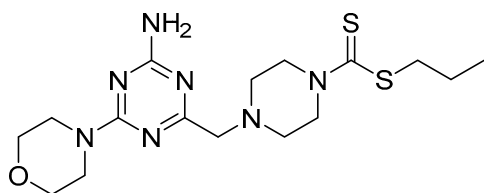

**Propyl-4-((4-amino-6-morpholino-1,3,5-triazin-2-yl)methyl)piperazine-1-carbodithioate (C18)** : Yield: 52.79%; white solid; m. p. 106.2-106.4 °C; <sup>1</sup>H NMR (400 MHz, DMSO-*d*<sub>6</sub>) δ 6.89 (d, *J* = 39.1 Hz, 2H, -NH<sub>2</sub>), 4.07 (d, *J* = 129.5 Hz, 4H, Piperazine-H), 3.66 (s, 4H, Morpholine-H), 3.60 (d, *J* = 4.8 Hz, 4H, -CH<sub>2</sub>-O-CH<sub>2</sub>-), 3.32 (s, 2H, -CH<sub>2</sub>-N-), 3.21 (t, *J* = 6.4 Hz, 2H, -S-CH<sub>2</sub>-), 2.63 (s, 4H, Piperazine-H), 1.64 (q, *J* = 7.3 Hz, 2H, -CH<sub>2</sub>-CH<sub>3</sub>), 0.95 (t, *J* = 7.4 Hz, 3H, -CH<sub>2</sub>-CH<sub>3</sub>). <sup>13</sup>C NMR (101 MHz, DMSO-*d*<sub>6</sub>) δ 195.68, 174.13, 167.22, 165.02, 66.40 (2), 63.35 (2), 52.44 (2), 51.41, 50.15, 43.55, 38.52, 22.29, 13.80. HRMS (ESI): Calculated for C<sub>16</sub>H<sub>28</sub>N<sub>7</sub>OS<sub>2</sub> [M+H]<sup>+</sup>: 398.17913, found: 398.17749.

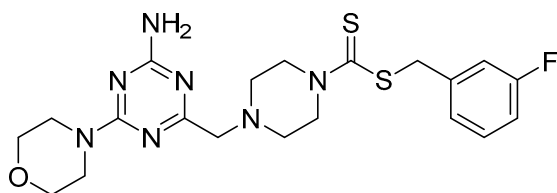

**3-fluorobenzyl 4-((4-amino-6-morpholino-1,3,5-triazin-2-yl)methyl)piperazine-1-carbodithioate (C19)** : Yield: 73.24%; white solid; m. p. 121.4-121.7 °C; <sup>1</sup>H NMR (500 MHz, DMSO-*d*<sub>6</sub>) δ 7.35 (q, *J* = 7.5 Hz, 1H, Ar-H), 7.23 (d, *J* = 7.4 Hz, 2H, Ar-H), 7.12 – 7.07 (m, 1H, Ar-H), 6.90 (d, *J* = 64.9 Hz, 2H, -NH<sub>2</sub>), 4.56 (s, 2H, -S-CH<sub>2</sub>), 4.07 (d, *J* = 174.7 Hz, 4H, Piperazine-H), 3.65 (s,

4H, Morpholine-H), 3.58 (d,  $J = 4.5$  Hz, 4H, -CH<sub>2</sub>-O-CH<sub>2</sub>-), 3.31 (s, 2H, -CH<sub>2</sub>-N-), 2.63 (s, 4H, Piperazine-H). <sup>13</sup>C NMR (126 MHz, CDCl<sub>3</sub>)  $\delta$  195.79, 174.33, 166.91, 164.84, 138.79, 138.72, 130.06, 129.97, 125.01, 124.98, 116.34, 116.12, 114.58, 114.37, 66.71 (2), 63.58 (2), 52.72 (2), 51.21, 49.71, 41.34, 41.32. HRMS (ESI): Calculated for C<sub>20</sub>H<sub>27</sub>N<sub>7</sub>OS<sub>2</sub> [M+H]<sup>+</sup>: 464.16970, found: 464.16812.

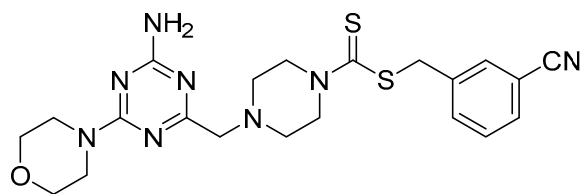

**3-cyanobenzyl-4-((4-amino-6-morpholino-1,3,5-triazin-2-yl)methyl)piperazine-1-carbodithioate (C20):** Yield: 68.12%; white solid; m. p. 112.4-112.8 °C; <sup>1</sup>H NMR (500 MHz, DMSO-*d*<sub>6</sub>)  $\delta$  7.85 (s, 1H, Ar-H), 7.73 (d,  $J = 10.8$  Hz, 2H, Ar-H), 7.53 (t,  $J = 7.8$  Hz, 1H, Ar-H), 6.90 (d,  $J = 63.7$  Hz, 2H, -NH<sub>2</sub>), 4.61 (s, 2H, -S-CH<sub>2</sub>), 4.06 (d,  $J = 169.6$  Hz, 4H, Piperazine-H), 3.65 (s, 4H, Morpholine-H), 3.58 (s, 4H, -CH<sub>2</sub>-O-CH<sub>2</sub>-), 3.31 (s, 2H, -CH<sub>2</sub>-N-), 2.62 (s, 4H, Piperazine-H). <sup>13</sup>C NMR (126 MHz, CDCl<sub>3</sub>)  $\delta$  195.04, 174.30, 166.92, 164.85, 138.55, 133.81, 132.77, 131.04, 129.26, 118.69, 112.56, 66.71 (2), 63.57 (2), 52.71 (2), 51.48, 49.80, 43.48, 40.44. HRMS (ESI): Calculated for C<sub>21</sub>H<sub>27</sub>N<sub>8</sub>OS<sub>2</sub> [M+H]<sup>+</sup>: 471.17438, found: 471.17239.

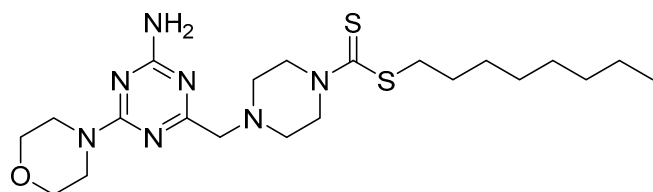

**Octyl-4-((4-amino-6-morpholino-1,3,5-triazin-2-yl)methyl)piperazine-1-carbodi**

**thioate (C21):** Yield:62.87%; white solid; m. p. 68.1-68.4 °C; <sup>1</sup>H NMR (400 MHz, CDCl<sub>3</sub>) δ 5.33 – 4.98 (m, 2H, -NH<sub>2</sub>), 4.22 (d, *J* = 164.6 Hz, 4H, Piperazine-H), 3.79 (s, 4H, Morpholine-H), 3.71 (dd, *J* = 5.6, 3.8 Hz, 4H, -CH<sub>2</sub>-O-CH<sub>2</sub>-), 3.44 (s, 2H, -S-CH<sub>2</sub>), 3.32 – 3.27 (m, 2H, -CH<sub>2</sub>-N-), 2.69 (t, *J* = 5.1 Hz, 4H, Piperazine-H), 1.69 (s, 2H, -S-CH<sub>2</sub>-CH<sub>2</sub>-), 1.42 (td, *J* = 8.7, 5.0 Hz, 2H, -CH<sub>2</sub>-(CH<sub>2</sub>)<sub>4</sub>-CH<sub>3</sub>), 1.32 – 1.25 (m, 8H, -(CH<sub>2</sub>)<sub>4</sub>-CH<sub>3</sub>), 0.90 – 0.85 (m, 3H, -CH<sub>2</sub>-CH<sub>3</sub>). <sup>13</sup>C NMR (101 MHz, CDCl<sub>3</sub>) δ 197.35, 174.37, 166.87, 164.83, 77.39, 77.07, 76.76, 66.72 (2), 63.60 (2), 52.76 (2), 37.33, 31.82, 29.73, 29.19 (2), 29.07, 28.63, 22.67, 14.15. HRMS (ESI): Calculated for C<sub>21</sub>H<sub>38</sub>N<sub>7</sub>OS<sub>2</sub> [M+H]<sup>+</sup>: 468.25738, found: 468.25558.

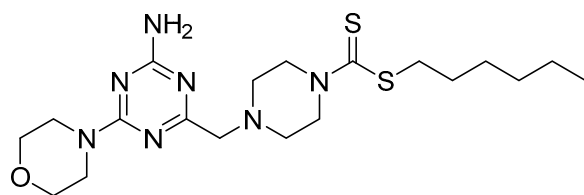

**Hexyl-4-((4-amino-6-morpholino-1,3,5-triazin-2-yl)methyl)piperazine-1-carbodi**

**thioate (C22):** Yield:55.26%; white solid; m. p. 68.1-68.4 °C; <sup>1</sup>H NMR (500 MHz, CDCl<sub>3</sub>) δ 5.21 (s, 2H, -NH<sub>2</sub>), 4.19 (d, *J* = 206.8 Hz, 4H, Piperazine-H), 3.76 (s, 4H, Morpholine-H), 3.69 – 3.66 (m, 4H, -CH<sub>2</sub>-O-CH<sub>2</sub>-), 3.40 (s, 2H, -S-CH<sub>2</sub>), 3.28 – 3.24 (m, 2H, -CH<sub>2</sub>-N-), 2.66 (s, 4H, Piperazine-H), 1.66 (p, *J* = 7.5 Hz, 2H, -S-CH<sub>2</sub>-CH<sub>2</sub>-), 1.40 (d, *J* = 6.9 Hz, 2H, -CH<sub>2</sub>-(CH<sub>2</sub>)<sub>2</sub>-CH<sub>3</sub>), 1.30 – 1.24 (m, 4H, -(CH<sub>2</sub>)<sub>2</sub>-CH<sub>3</sub>), 0.88 – 0.84 (m, 3H, -CH<sub>2</sub>-CH<sub>3</sub>). <sup>13</sup>C NMR (126 MHz, CDCl<sub>3</sub>) δ 197.42, 174.44, 166.97, 164.91, 66.79 (2), 63.67 (2), 52.83

(2), 50.90, 49.62, 43.54, 37.39, 31.46, 28.80, 28.66, 22.62, 14.14. HRMS (ESI): Calculated for  $C_{21}H_{34}N_7OS_2$   $[M+H]^+$ : 440.22608, found: 440.22421.

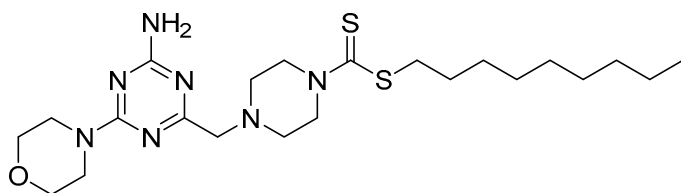

**Dodecyl-4-((4-amino-6-morpholino-1,3,5-triazin-2-yl)methyl)piperazine-1-carbodithioate (C23):** Yield: 48.11%; white solid; m. p. 67.2-67.5 °C;  $^1H$  NMR (500 MHz,  $CDCl_3$ )  $\delta$  5.26 (s, 2H,  $-NH_2$ ), 4.43 (s, 4H, Piperazine-H), 3.79 (s, 4H, Morpholine-H), 3.71 (t,  $J = 4.5$  Hz, 4H,  $-CH_2-O-CH_2-$ ), 3.44 (s, 2H,  $-S-CH_2$ ), 3.29 (t,  $J = 7.5$  Hz, 2H,  $-CH_2-N-$ ), 2.70 (s, 4H, Piperazine-H), 1.70 (p,  $J = 7.6$  Hz, 2H,  $-S-CH_2-\underline{CH_2}-$ ), 1.40 (q,  $J = 7.4$  Hz, 2H,  $-\underline{CH_2}-(CH_2)_5-CH_3$ ), 1.28 (dd,  $J = 12.7, 5.6$  Hz, 10H,  $-(\underline{CH_2})_5-CH_3$ ), 0.90 – 0.86 (m, 3H,  $-CH_2-\underline{CH_3}$ ).  $^{13}C$  NMR (126 MHz,  $CDCl_3$ )  $\delta$  197.42, 174.45, 166.99, 164.92, 66.79 (2), 63.68 (2), 50.91 (2), 49.62, 43.54, 37.39, 31.95, 29.54, 29.34, 29.29, 29.13, 28.70, 2.76, 14.22. HRMS (ESI): Calculated for  $C_{22}H_{40}N_7OS_2$   $[M+H]^+$ : 482.27303, found: 482.27127.

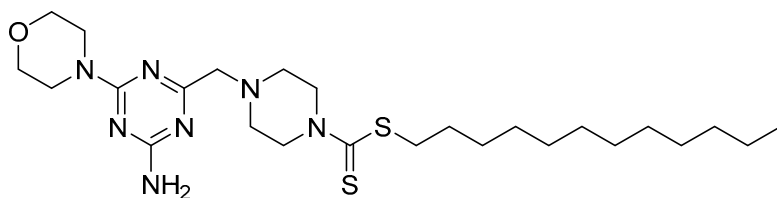

**Dodecyl-4-((4-amino-6-morpholino-1,3,5-triazin-2-yl)methyl)piperazine-1-carbodithioate (C24):** Yield: 44.94%; white solid; m. p. 70.8-71.3 °C;  $^1H$  NMR (500 MHz,  $CDCl_3$ )  $\delta$  5.23 (s, 2H,  $-NH_2$ ), 4.19 (d,  $J = 207.5$  Hz, 4H, Piperazine-



H), 3.75 (s, 4H, Morpholine-H), 3.67 (d,  $J = 4.3$  Hz, 4H, -CH<sub>2</sub>-O-CH<sub>2</sub>-), 3.40 (s, 2H, -S-CH<sub>2</sub>), 3.25 (t,  $J = 7.5$  Hz, 2H, -CH<sub>2</sub>-N-), 2.66 (s, 4H, Piperazine-H), 1.66 (t,  $J = 7.5$  Hz, 2H, -S-CH<sub>2</sub>-CH<sub>2</sub>-), 1.37 (t,  $J = 7.7$  Hz, 2H, -CH<sub>2</sub>-(CH<sub>2</sub>)<sub>8</sub>-CH<sub>3</sub>), 1.22 (s, 16H, -(CH<sub>2</sub>)<sub>8</sub>-CH<sub>3</sub>), 0.84 (t,  $J = 6.8$  Hz, 3H, -CH<sub>2</sub>-CH<sub>3</sub>). <sup>13</sup>C NMR (126 MHz, CDCl<sub>3</sub>)  $\delta$  197.42, 174.42, 166.95, 164.90, 66.79 (2), 63.66 (2), 52.83 (2), 50.90, 49.61, 43.55, 37.39, 32.00, 29.74, 29.72, 29.59, 29.44, 29.30, 29.14, 28.70, 22.78, 14.24. HRMS (ESI): Calculated for C<sub>25</sub>H<sub>46</sub>N<sub>7</sub>OS<sub>2</sub> [M+H]<sup>+</sup>: 524.31998, found: 524.31848.

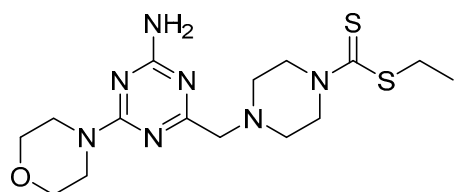

**Ethyl-4-((4-amino-6-morpholino-1,3,5-triazin-2-yl)methyl)piperazine-1-carbodithioate (C25):** Yield: 62.33%; white solid; m. p. 114.1-114.7 °C; <sup>1</sup>H NMR (500 MHz, DMSO-*d*<sub>6</sub>)  $\delta$  6.90 (d,  $J = 66.0$  Hz, 2H, -NH<sub>2</sub>), 4.06 (d,  $J = 172.4$  Hz, 4H, Piperazine-H), 3.68 – 3.64 (m, 4H, Morpholine-H), 3.61 – 3.58 (m, 4H, -CH<sub>2</sub>-O-CH<sub>2</sub>-), 3.31 (s, 2H, -S-CH<sub>2</sub>), 3.21 (d,  $J = 7.3$  Hz, 2H, -CH<sub>2</sub>-N-), 2.63 (t,  $J = 5.2$  Hz, 4H, Piperazine-H), 1.25 (t,  $J = 7.4$  Hz, 3H, -CH<sub>2</sub>-CH<sub>3</sub>). <sup>13</sup>C NMR (126 MHz, DMSO-*d*<sub>6</sub>)  $\delta$  195.57, 174.19, 167.29, 165.09, 66.46 (2), 63.44 (2), 52.50 (2), 51.32, 50.16, 43.58, 31.02, 14.40. HRMS (ESI): Calculated for C<sub>15</sub>H<sub>26</sub>N<sub>7</sub>OS<sub>2</sub> [M+H]<sup>+</sup>: 384.16348, found: 384.16171.

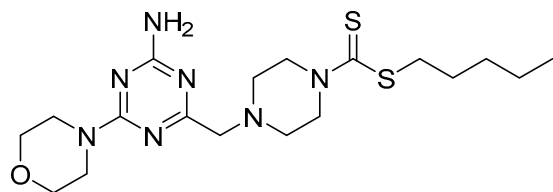

**Pentyl-4-((4-amino-6-morpholino-1,3,5-triazin-2-yl)methyl)piperazine-1-carbodithioate (C26):** Yield: 55.17%; white solid; m. p. 84.1-84.9 °C; <sup>1</sup>H NMR (500 MHz, CDCl<sub>3</sub>) δ 5.15 (s, 2H, -NH<sub>2</sub>), 4.19 (d, *J* = 207.6 Hz, 4H, Piperazine-H), 3.76 (s, 4H, Morpholine-H), 3.70 – 3.67 (m, 4H, -CH<sub>2</sub>-O-CH<sub>2</sub>-), 3.41 (s, 2H, -S-CH<sub>2</sub>), 3.29 – 3.24 (m, 2H, -CH<sub>2</sub>-N-), 2.66 (s, 4H, Piperazine-H), 1.67 (p, *J* = 7.4 Hz, 2H, -S-CH<sub>2</sub>-CH<sub>2</sub>-), 1.40 – 1.28 (m, 4H, -(CH<sub>2</sub>)<sub>2</sub>-CH<sub>3</sub>), 0.87 (t, *J* = 7.2 Hz, 3H, -CH<sub>2</sub>-CH<sub>3</sub>). <sup>13</sup>C NMR (126 MHz, CDCl<sub>3</sub>) δ 197.41, 174.49, 167.00, 164.92, 66.80 (2), 63.70 (2), 52.84 (2), 50.92, 49.62, 43.54, 37.35, 31.27, 28.41, 22.39, 14.09. HRMS (ESI): Calculated for C<sub>18</sub>H<sub>32</sub>N<sub>7</sub>OS<sub>2</sub> [M+H]<sup>+</sup>: 426.21043, found: 426.20877.

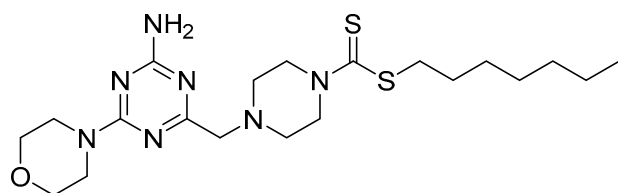

**Heptyl-4-((4-amino-6-morpholino-1,3,5-triazin-2-yl)methyl)piperazine-1-carbodithioate (C27):** Yield: 64.05%; white solid; m. p. 69.6-69.9 °C; <sup>1</sup>H NMR (500 MHz, CDCl<sub>3</sub>) δ 5.15 (s, 2H, -NH<sub>2</sub>), 4.20 (d, *J* = 207.4 Hz, 4H, Piperazine-H), 3.76 (s, 4H, Morpholine-H), 3.69 (dd, *J* = 5.7, 3.8 Hz, 4H, -CH<sub>2</sub>-O-CH<sub>2</sub>-), 3.41 (s, 2H, -S-CH<sub>2</sub>), 3.31 – 3.23 (m, 2H, -CH<sub>2</sub>-N-), 2.67 (s, 4H, Piperazine-H), 1.71 – 1.63 (m, 2H, -S-CH<sub>2</sub>-CH<sub>2</sub>-), 1.44 – 1.33 (m, 2H, -CH<sub>2</sub>-(CH<sub>2</sub>)<sub>3</sub>-CH<sub>3</sub>), 1.32 – 1.22 (m, 6H, -(CH<sub>2</sub>)<sub>3</sub>-CH<sub>3</sub>), 0.85 (t, *J* = 6.9 Hz, 3H, -CH<sub>2</sub>-CH<sub>3</sub>). <sup>13</sup>C NMR (126 MHz, CDCl<sub>3</sub>) δ 197.43, 174.47, 166.97, 164.92, 66.80 (2), 63.69 (2), 52.84 (2), 50.92, 49.62, 43.56, 37.40, 31.79, 29.09, 28.97, 28.71, 22.69, 14.20.

HRMS (ESI): Calculated for  $C_{20}H_{36}N_7OS_2$   $[M+H]^+$ : 454.24173, found: 454.239

93.

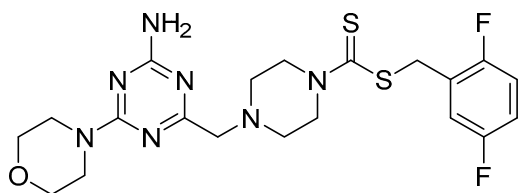

**2,5-difluorobenzyl-4-((4-amino-6-morpholino-1,3,5-triazin-2-yl)methyl)piperazin**

**e-1-carbodithioate (C28):** Yield: 67.28%; white solid; m. p. 94.4-95.0 °C;  $^1H$  NMR (500 MHz,  $CDCl_3$ )  $\delta$  7.25 – 7.20 (m, 1H, Ar-H), 6.87 (t,  $J$  = 7.8 Hz, 2H, Ar-H), 5.23 (s, 2H, -NH<sub>2</sub>), 4.54 (s, 2H, -S-CH<sub>2</sub>), 4.16 (d,  $J$  = 239.9 Hz, 4H, Piperazine-H), 3.75 (s, 4H, Morpholine-H), 3.68 (dd,  $J$  = 5.6, 3.9 Hz, 4H, -CH<sub>2</sub>-O-CH<sub>2</sub>-), 3.40 (s, 2H, -CH<sub>2</sub>-N-), 2.66 (s, 4H, Piperazine-H).  $^{13}C$  NMR (126 MHz,  $CDCl_3$ )  $\delta$  195.75, 174.31, 166.87, 164.86, 129.70, 129.62, 111.59, 111.55, 111.43, 111.39, 111.34, 66.77 (2), 63.55 (2), 52.72 (2), 50.92, 49.74, 29.54. HRMS (ESI): Calculated for  $C_{18}H_{32}N_7OS_2$   $[M+H]^+$ : 426.21043, found: 426.20877.

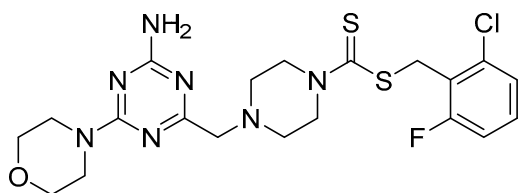

**3-chlorobenzyl-4-((4-amino-6-morpholino-1,3,5-triazin-2-yl)methyl)piperazine-1-**

**carbodithioate (C29):** Yield: 67.84%; white solid; m. p. 136.0-136.3 °C;  $^1H$  NMR (500 MHz,  $DMSO-d_6$ )  $\delta$  7.41 – 7.32 (m, 2H, Ar-H), 7.24 (dt,  $J$  = 11.3, 5.4 Hz, 1H, Ar-H), 6.85 (d,  $J$  = 64.5 Hz, 2H, -NH<sub>2</sub>), 4.48 (d,  $J$  = 3.6 Hz, 2H, -S-CH<sub>2</sub>), 3.99 (d,  $J$  = 197.0 Hz, 4H, Piperazine-H), 3.61 (s, 4H, Morpholine-H), 3.54 (d,  $J$  = 5.6 Hz, 4H, -CH<sub>2</sub>-O-

CH<sub>2</sub>-), 3.27 (d, *J* = 3.4 Hz, 2H, -CH<sub>2</sub>-N-), 2.59 (d, *J* = 20.8 Hz, 4H, Piperazine-H). <sup>13</sup>C NMR (126 MHz, DMSO-*d*<sub>6</sub>) δ 193.90, 174.21, 167.30, 165.09, 162.56, 160.58, 135.44, 135.40, 131.39, 131.32, 126.30, 126.27, 121.38, 121.23, 115.37, 115.19, 66.46 (2), 63.35 (2), 52.42 (2), 51.47, 50.36, 43.60, 33.46. HRMS (ESI): Calculated for C<sub>20</sub>H<sub>26</sub>ClFN<sub>7</sub>OS<sub>2</sub> [M+H]<sup>+</sup>: 498.13073, found: 498.12888.

C<sub>20</sub>H<sub>27</sub>ClN<sub>7</sub>OS<sub>2</sub>

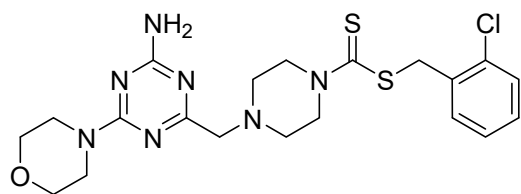

**2-chlorobenzyl-4-((4-amino-6-morpholino-1,3,5-triazin-2-yl)methyl)piperazine-1-carbodithioate (C30):** Yield: 61.28%; white solid; m. p. 121.3-121.6 °C; <sup>1</sup>H NMR (500 MHz, DMSO-*d*<sub>6</sub>) δ 7.42 (s, 1H, Ar-H), 7.34 – 7.24 (m, 3H, Ar-H), 6.84 (d, *J* = 61.0 Hz, 2H, -NH<sub>2</sub>), 4.52 (s, 2H, -S-CH<sub>2</sub>), 4.02 (d, *J* = 172.5 Hz, 4H, Piperazine-H), 3.61 (s, 4H, Morpholine-H), 3.54 (d, *J* = 5.1 Hz, 4H, -CH<sub>2</sub>-O-CH<sub>2</sub>-), 3.27 (s, 2H, -CH<sub>2</sub>-N-), 2.59 (s, 4H, Piperazine-H). <sup>13</sup>C NMR (126 MHz, DMSO-*d*<sub>6</sub>) δ 194.59, 174.18, 167.30, 165.09, 139.90, 133.44, 130.82, 129.42, 128.43, 127.80, 66.46 (2), 63.40 (2), 52.51 (2), 51.85, 50.36, 43.60, 40.46. HRMS (ESI): Calculated for C<sub>20</sub>H<sub>27</sub>ClN<sub>7</sub>OS<sub>2</sub> [M+H]<sup>+</sup>: 480.14015, found: 480.13837.

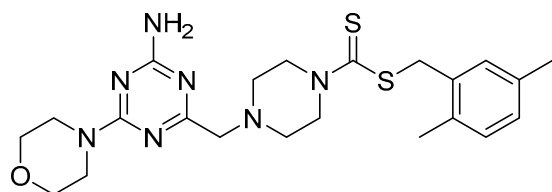

**2,5-dimethylbenzyl-4-((4-amino-6-morpholino-1,3,5-triazin-2-yl)methyl)piperazine-1-carbodithioate (C31):** Yield: 79.64%; white solid; m. p. 192.2-193.0 °C; <sup>1</sup>H NMR (500 MHz, DMSO-*d*<sub>6</sub>) δ 7.05 (dd, *J* = 8.4, 6.4 Hz, 1H, Ar-H), 6.99 (d, *J* = 7.4 Hz, 2H, Ar-H), 6.86 (d, *J* = 67.9 Hz, 2H, -NH<sub>2</sub>), 4.33 (s, 2H, -S-CH<sub>2</sub>), 4.00 (d, *J* = 201.2 Hz, 4H, Piperazine-H), 3.64 – 3.59 (m, 4H, Morpholine-H), 3.56 – 3.53 (m, 4H, -CH<sub>2</sub>-O-CH<sub>2</sub>-), 3.27 (s, 2H, -CH<sub>2</sub>-N-), 2.58 (d, *J* = 27.3 Hz, 4H, Piperazine-H), 2.26 (s, 6H, Ar-CH<sub>3</sub>). <sup>13</sup>C NMR (126 MHz, DMSO-*d*<sub>6</sub>) δ 195.25, 174.20, 167.29, 165.09, 137.98 (2), 131.35, 128.66 (2), 128.24, 66.46 (2), 63.44 (2), 52.49 (2), 51.18, 50.22, 43.60, 37.78, 19.89 (2). HRMS (ESI): Calculated for C<sub>22</sub>H<sub>32</sub>N<sub>7</sub>OS<sub>2</sub> [M+H]<sup>+</sup>: 474.21043, found: 474.20853.

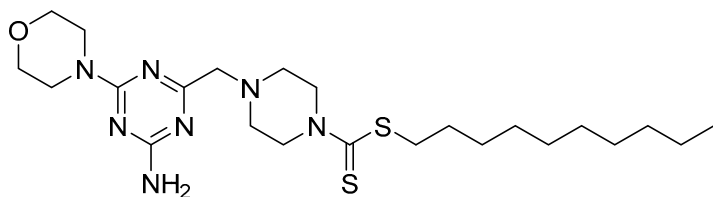

**Decyl-4-((4-amino-6-morpholino-1,3,5-triazin-2-yl)methyl)piperazine-1-carbodithioate (32):** Yield: 47.51%; white solid; m. p. 83.2-84.1 °C; <sup>1</sup>H NMR (500 MHz, CDCl<sub>3</sub>) δ 5.15 (d, *J* = 84.3 Hz, 2H, -NH<sub>2</sub>), 4.20 (d, *J* = 206.8 Hz, 4H, Piperazine-H), 3.77 (s, 4H, Morpholine-H), 3.69 (dd, *J* = 5.7, 3.8 Hz, 4H, -CH<sub>2</sub>-O-CH<sub>2</sub>-), 3.41 (d, *J* = 1.0 Hz, 2H, -S-CH<sub>2</sub>), 3.26 (dd, *J* = 8.1, 6.9 Hz, 2H, -CH<sub>2</sub>-N-), 2.67 (s, 4H, Piperazine-H), 1.69 – 1.63 (m, 2H, -S-CH<sub>2</sub>-CH<sub>2</sub>-), 1.38 (t, *J* = 7.7 Hz, 2H, -CH<sub>2</sub>-(CH<sub>2</sub>)<sub>6</sub>-), 1.24 (d, *J* = 6.2 Hz, 12H, -(CH<sub>2</sub>)<sub>6</sub>-CH<sub>3</sub>), 0.86 – 0.83 (m, 3H, -CH<sub>2</sub>-CH<sub>3</sub>). <sup>13</sup>C NMR (126 MHz, CDCl<sub>3</sub>) δ 197.44, 174.26, 166.73, 164.81, 66.78 (2), 63.57 (2), 52.83 (2), 50.89, 49.59, 43.58, 37.40, 31.

98, 29.63, 29.59, 29.40, 29.30, 29.14, 28.70, 22.77, 14.23. HRMS (ESI): Calculated for  $C_{23}H_{42}N_7OS_2$   $[M+H]^+$ : 496.28868, found: 496.28705.

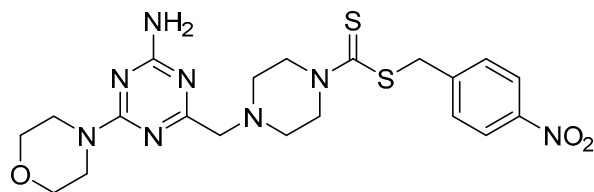

**4-nitrobenzyl-4-((4-amino-6-morpholino-1,3,5-triazin-2-yl)methyl)piperazine-1-carbodithioate (C33):** Yield: 85.74%; white solid; m. p. 149.8-150.4 °C;  $^1H$  NMR (500 MHz, DMSO- $d_6$ )  $\delta$  8.18 (d,  $J$  = 8.6 Hz, 2H, Ar-H), 7.66 (d,  $J$  = 8.6 Hz, 2H, Ar-H), 6.91 (d,  $J$  = 61.4 Hz, 2H, -NH<sub>2</sub>), 4.73 (s, 2H, -S-CH<sub>2</sub>), 4.08 (d,  $J$  = 164.0 Hz, 4H, Piperazine-H), 3.66 (s, 4H, Morpholine-H), 3.59 (s, 4H, -CH<sub>2</sub>-O-CH<sub>2</sub>-), 3.32 (s, 2H, -CH<sub>2</sub>-N-), 2.64 (s, 4H, Piperazine-H). HRMS (ESI): Calculated for  $C_{20}H_{27}N_8O_3S_2$   $[M+H]^+$ : 491.16420, found: 491.16257.  $^{13}C$  NMR (126 MHz, CDCl<sub>3</sub>)  $\delta$  194.98, 174.30, 166.95, 164.88, 147.19, 144.78, 130.22 (2), 123.79 (2), 66.77 (2), 63.59 (2), 52.77 (2), 51.63, 49.89, 43.55, 40.57. HRMS (ESI): Calculated for  $C_{23}H_{42}N_7OS_2$   $[M+H]^+$ : 496.28868, found: 496.28705.

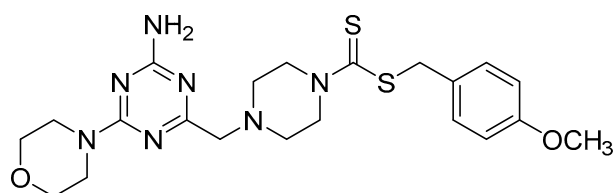

**4-methoxybenzyl-4-((4-amino-6-morpholino-1,3,5-triazin-2-yl)methyl)piperazine-1-carbodithioate (C34):** Yield: 61.32%; white solid; m. p. 113.4-114.2 °C;  $^1H$  NMR (500 MHz, DMSO- $d_6$ )  $\delta$  7.29 – 7.23 (m, 2H, Ar-H), 6.84 – 6.81 (m, 2

H, Ar-H), 4.40 (d,  $J = 3.6$  Hz, 2H, -NH<sub>2</sub>), 4.19 (s, 4H, Piperazine-H), 3.68 (d,  $J = 3.5$  Hz, 2H -S-CH<sub>2</sub>), 3.61 (s, 4H, Morpholine-H), 3.54 (d,  $J = 5.3$  Hz, 4 H, -CH<sub>2</sub>-O-CH<sub>2</sub>-), 3.28 (s, 2H, -CH<sub>2</sub>-N-), 2.59 (s, 4H, Piperazine-H). <sup>13</sup>C NMR (126 MHz, DMSO-*d*<sub>6</sub>)  $\delta$  195.25, 174.10, 167.25, 165.06, 159.15, 131.00 (2), 128.21, 114.45 (2), 66.45 (2), 63.28 (2), 55.62 (2), 52.48, 51.34, 50.19, 43.59, 41.02. HRMS (ESI): Calculated for C<sub>21</sub>H<sub>30</sub>N<sub>7</sub>O<sub>2</sub>S<sub>2</sub> [M+H]<sup>+</sup>: 476.18969, found: 476.18790.

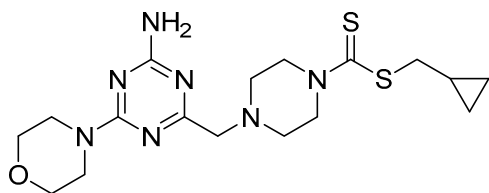

**Cyclopropylmethyl-4-((4-amino-6-morpholino-1,3,5-triazin-2-yl)methyl)piperazine-1-carbodithioate (C35):** Yield: 71.40%; white solid; m. p. 104.2-105.1 °C; <sup>1</sup>H NMR (500 MHz, DMSO-*d*<sub>6</sub>)  $\delta$  6.91 (d,  $J = 65.6$  Hz, 2H, -NH<sub>2</sub>), 4.07 (d,  $J = 160.5$  Hz, 4H, Piperazine-H), 3.66 (s, 4H, Morpholine-H), 3.60 (d,  $J = 4.8$  Hz, 4H, -CH<sub>2</sub>-O-CH<sub>2</sub>-), 3.32 (s, 2H, -S-CH<sub>2</sub>), 3.18 (d,  $J = 7.3$  Hz, 2H, -CH<sub>2</sub>-N-), 2.66 – 2.61 (m, 4H, Piperazine-H), 1.11 (s, 1H, -CH-(CH<sub>2</sub>)<sub>2</sub>), 0.55 – 0.51 (m, 2H, -CH<sub>2</sub>-CH<sub>2</sub>-), 0.31 – 0.27 (m, 2H, -CH<sub>2</sub>-CH<sub>2</sub>-). <sup>13</sup>C NMR (126 MHz, DMSO)  $\delta$  195.80, 174.11, 167.21, 165.01, 66.3 (2), 63.37 (2), 52.46 (2), 51.25, 50.13, 43.53, 42.85, 10.19, 6.10. HRMS (ESI): Calculated for C<sub>17</sub>H<sub>28</sub>N<sub>7</sub>OS<sub>2</sub> [M+H]<sup>+</sup>: 410.17913, found: 410.17749.

# 1. $^1\text{H}$ , $^{13}\text{C}$ , $^{19}\text{F}$ NMR, HRMS data

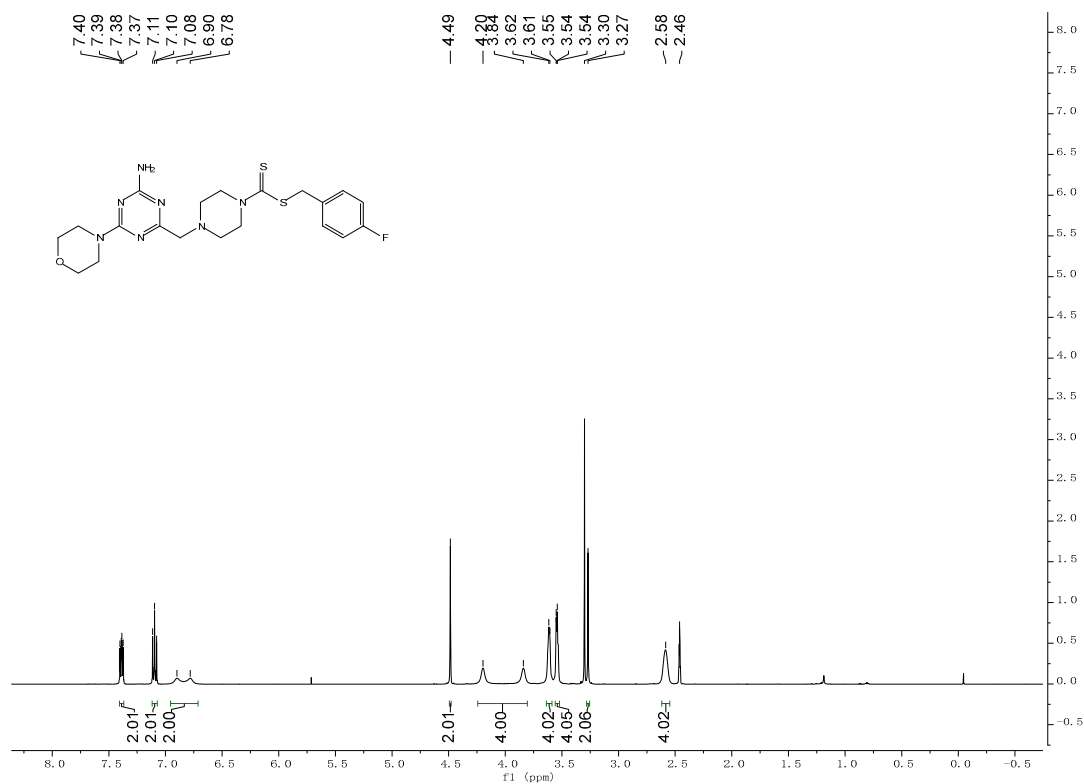

Figure S1.  $^1\text{H}$  NMR (500 MHz,  $\text{DMSO}-d_6$ ) spectrum of compound C1.

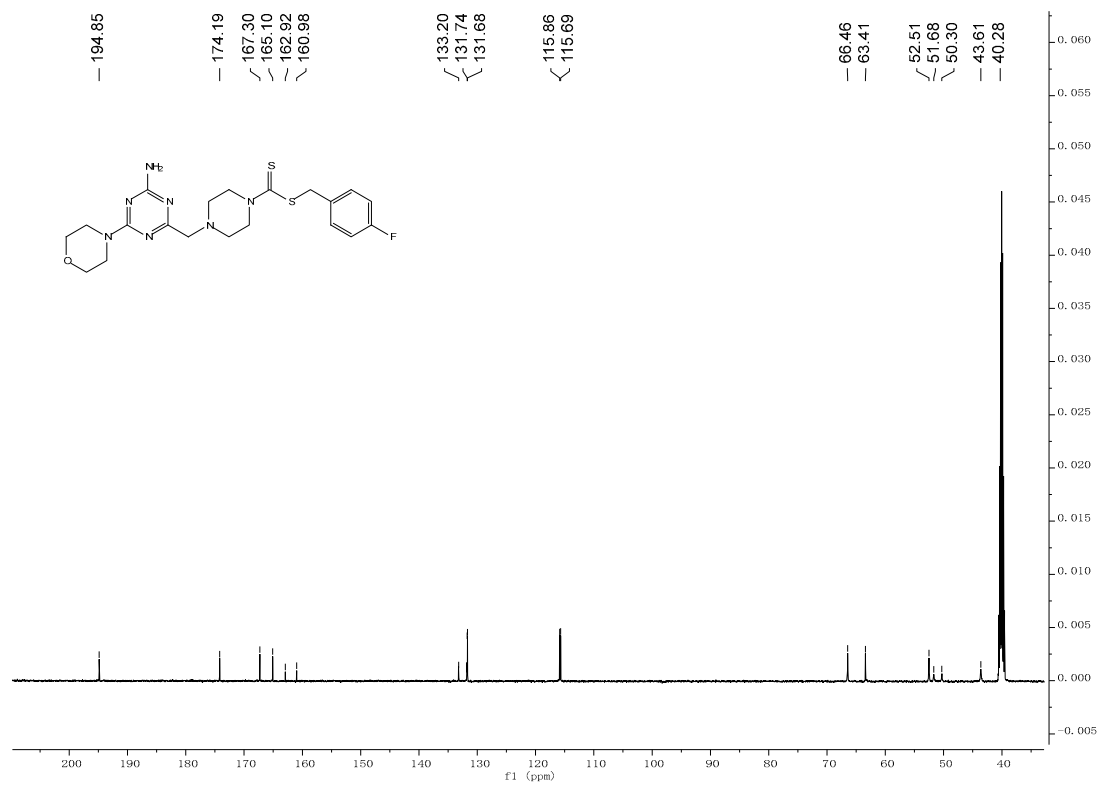

Figure S2.  $^{13}\text{C}$  NMR (126 MHz,  $\text{DMSO}-d_6$ ) spectrum of compound C1.



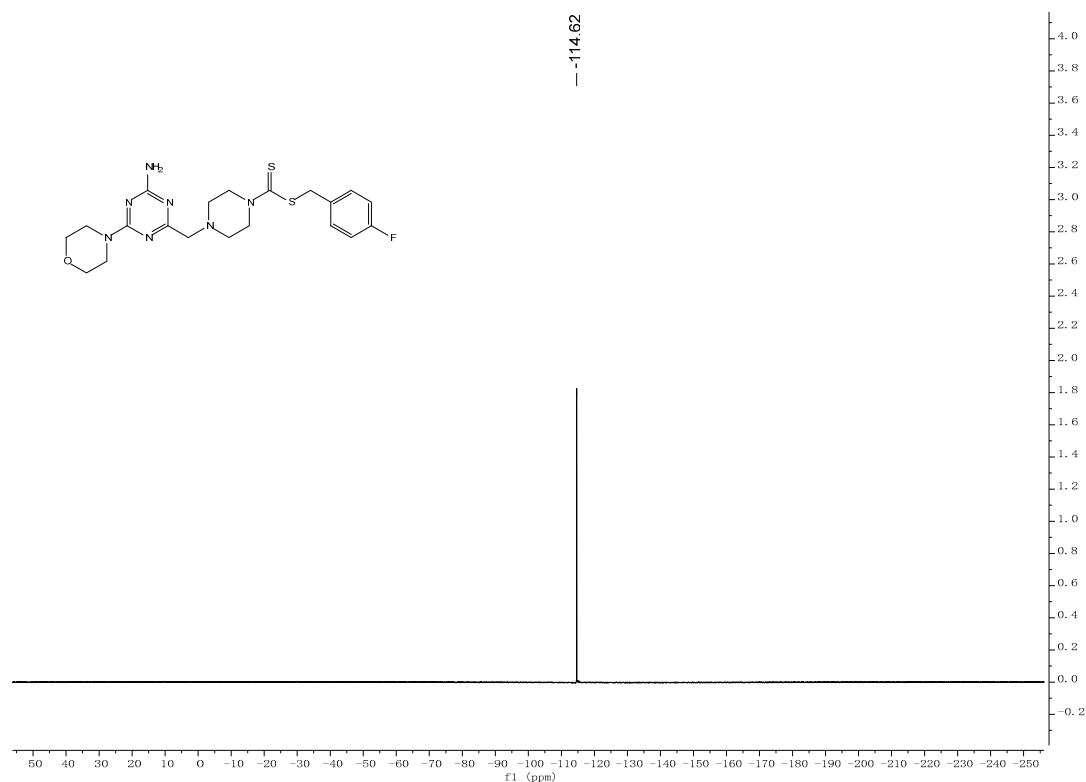

**Figure S3.**  $^{19}\text{F}$  NMR (471 MHz,  $\text{CDCl}_3$ ) spectrum of compound C1

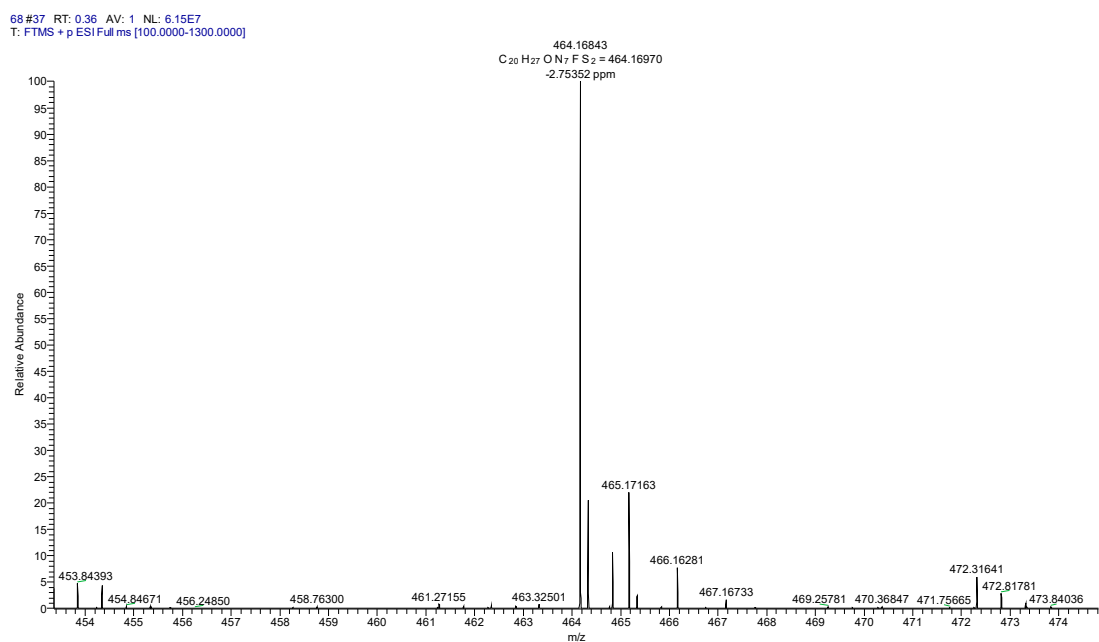

**Figure S4.** HRMS of compound C1.

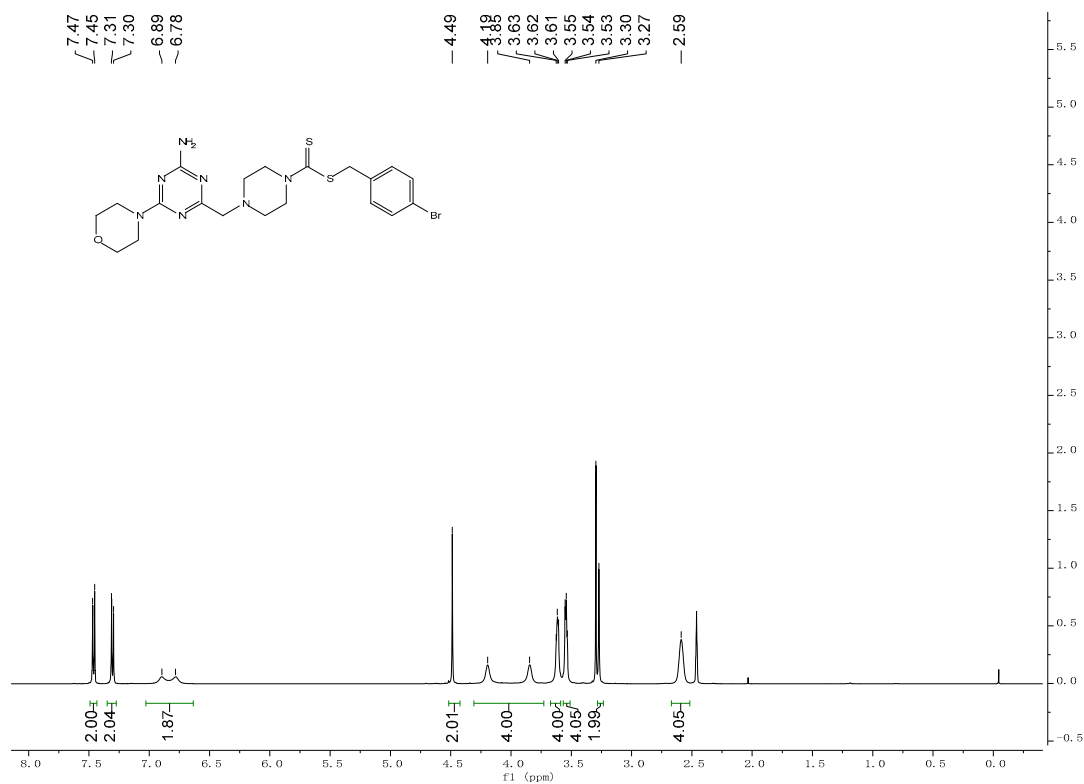

**Figure S5.** <sup>1</sup>H NMR (500 MHz, DMSO-*d*<sub>6</sub>) spectrum of compound C2.

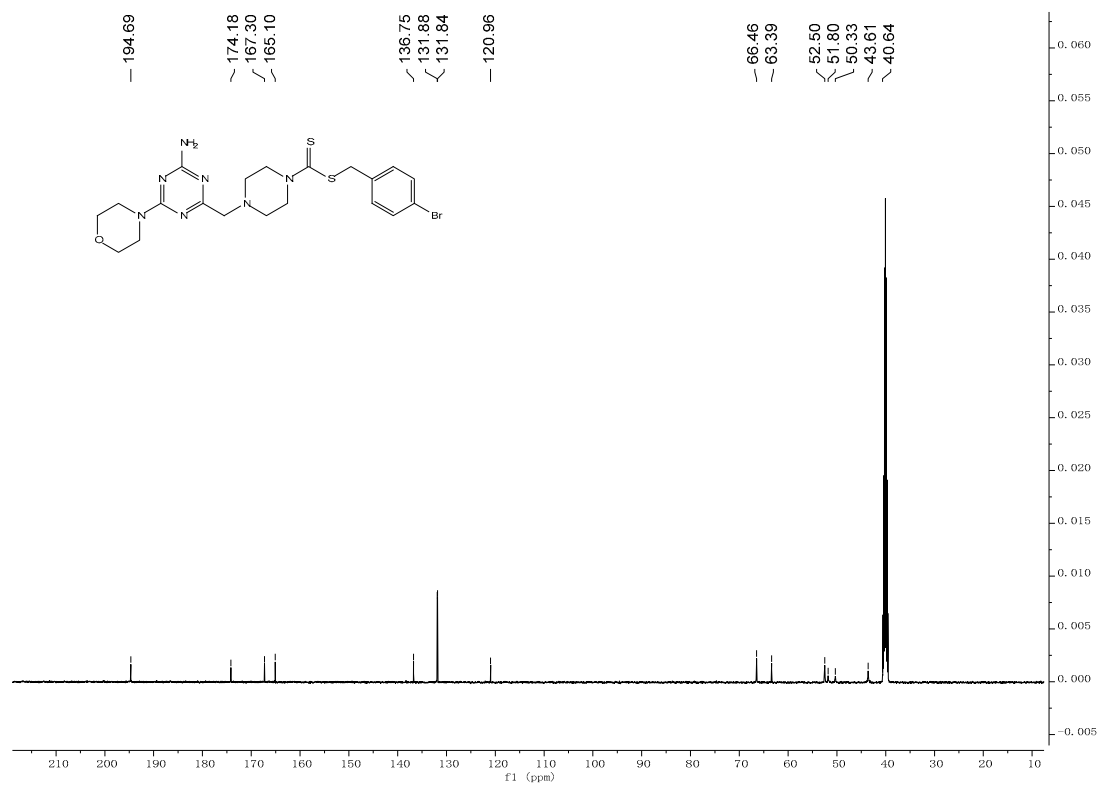

**Figure S6.** <sup>13</sup>C NMR (126 MHz, DMSO-*d*<sub>6</sub>) spectrum of compound C2.

69 #63 RT: 0.60 AV: 1 NL: 8.25E7  
T: FTMS + p ESI Full ms [100.0000-1300.0000]

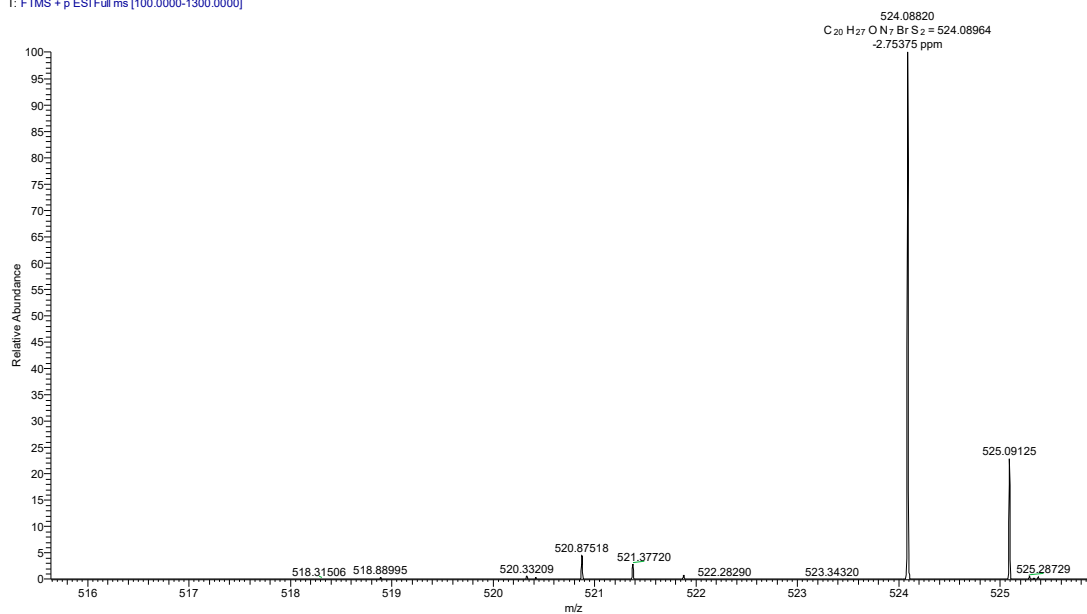

Figure S7. HRMS of compound C2.

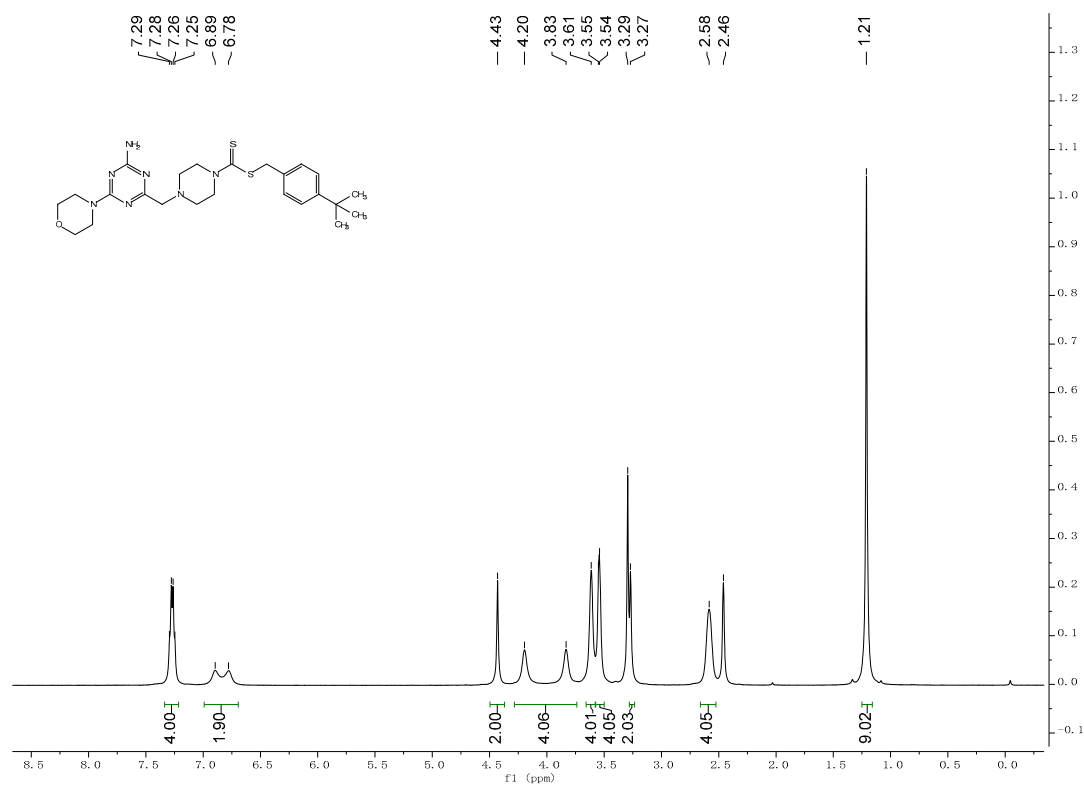

Figure S8. <sup>1</sup>H NMR (500 MHz, DMSO-*d*<sub>6</sub>) spectrum of compound C3.

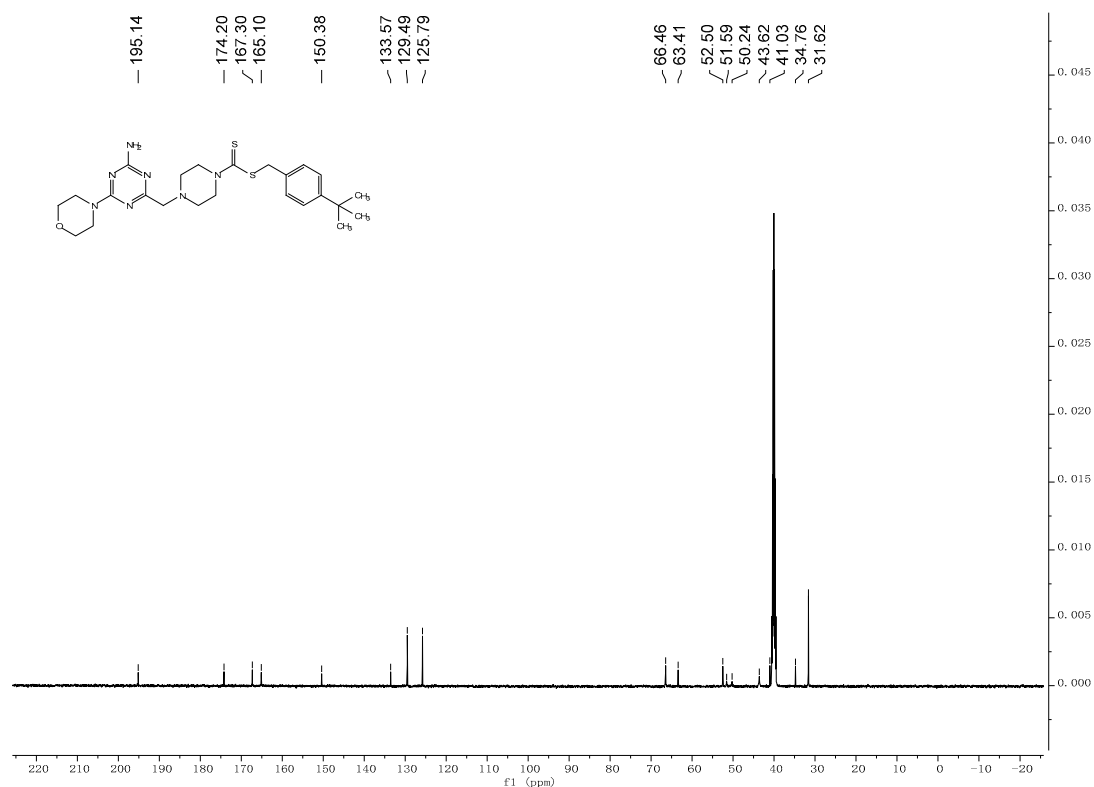

**Figure S9.** <sup>13</sup>C NMR (126 MHz, DMSO-*d*<sub>6</sub>) spectrum of compound C3.

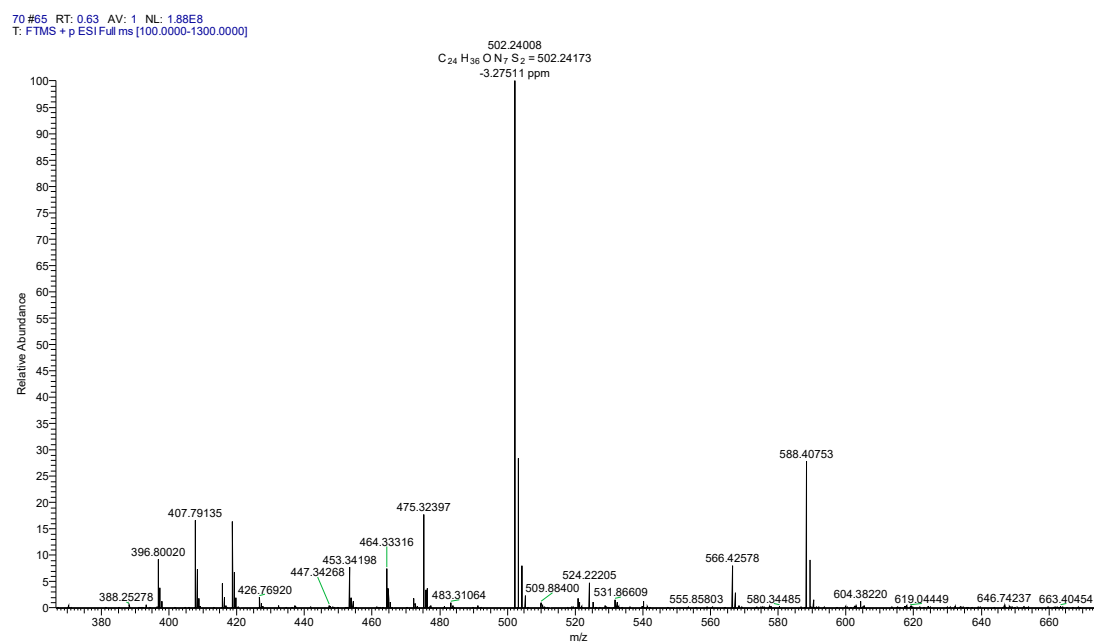

**Figure S10.** HRMS of compound C3.

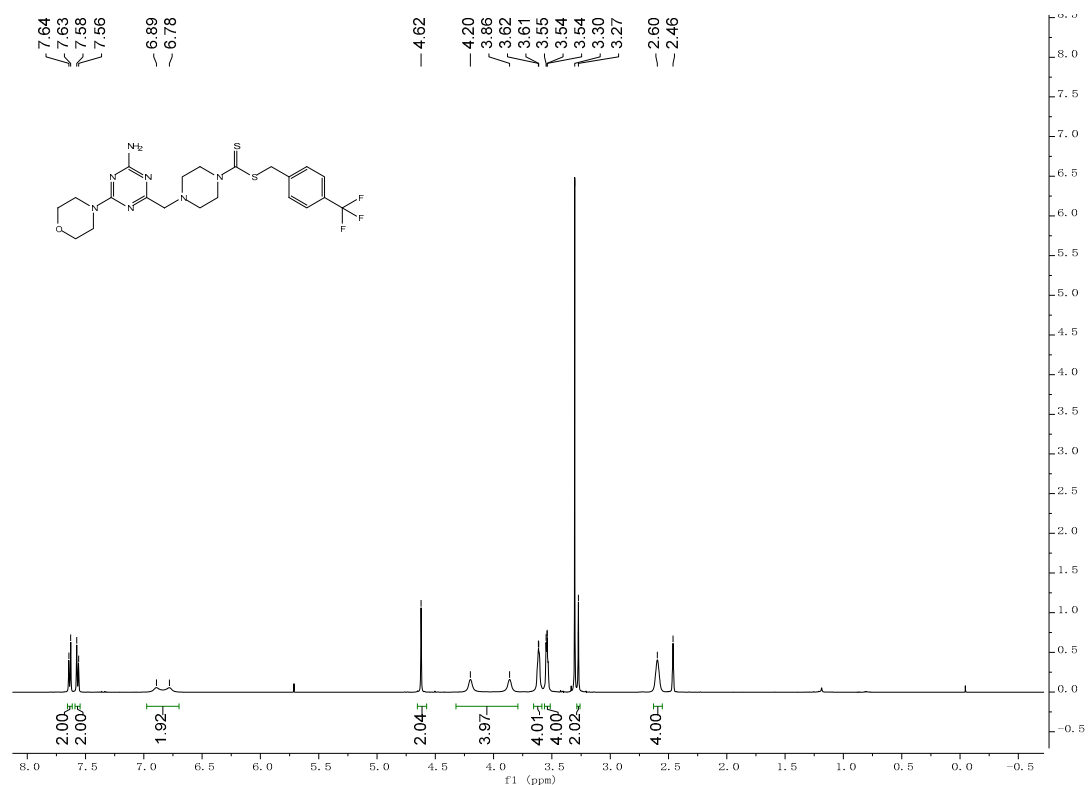

**Figure S11.** <sup>1</sup>H NMR (500 MHz, DMSO-*d*<sub>6</sub>) spectrum of compound C4.

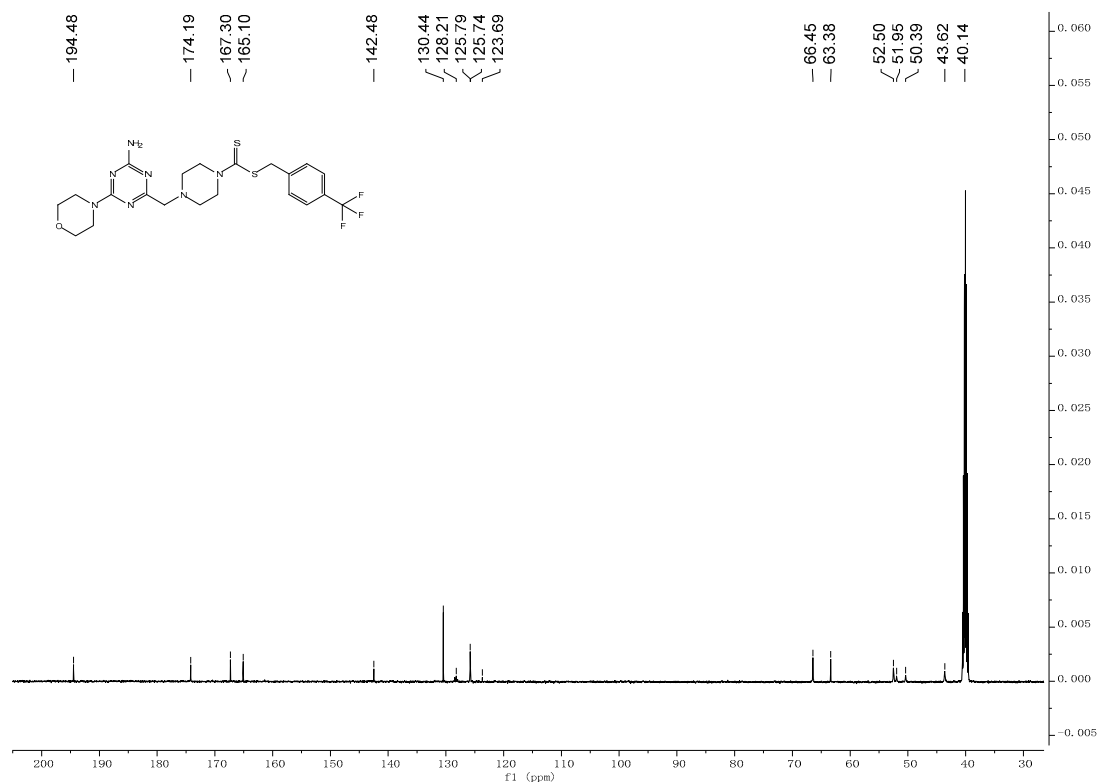

**Figure S12.** <sup>13</sup>C NMR (126 MHz, DMSO-*d*<sub>6</sub>) spectrum of compound C4.

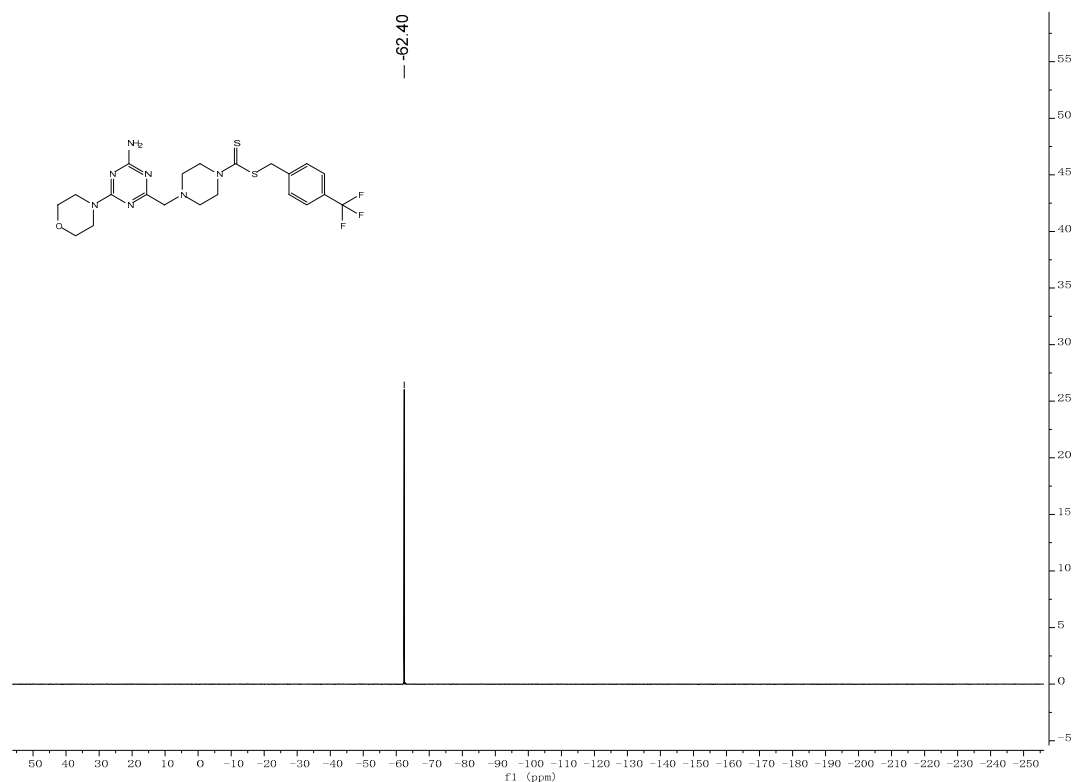

**Figure S13.**  $^{19}\text{F}$  NMR (471 MHz,  $\text{CDCl}_3$ ) spectrum of compound C4.

71 #43 RT: 0.42 AV: 1 NL: 3.54E8  
T: FTMS + p ESI Full ms [100.0000-1300.0000]

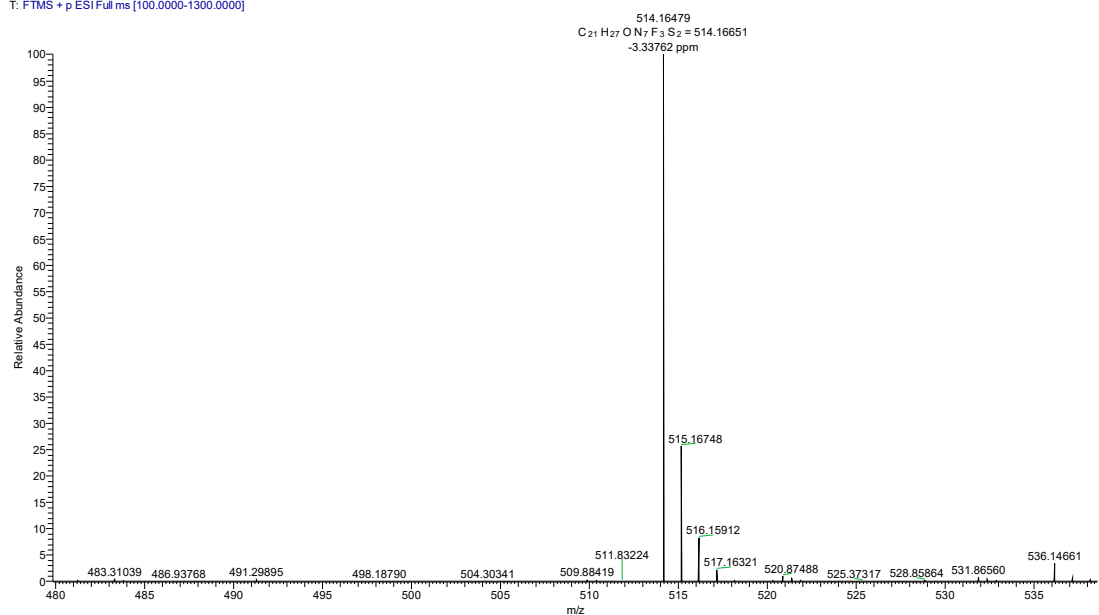

**Figure S14.** HRMS of compound C4.

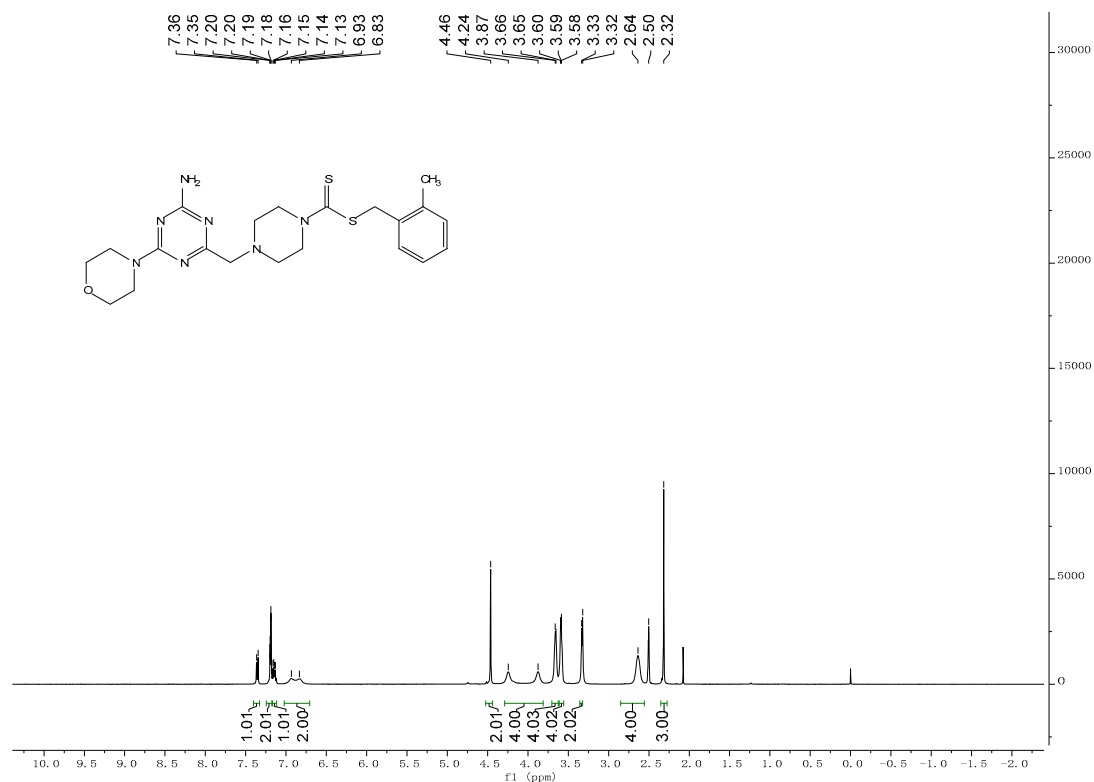

**Figure S15.** <sup>1</sup>H NMR (500 MHz, DMSO-*d*<sub>6</sub>) spectrum of compound C5.

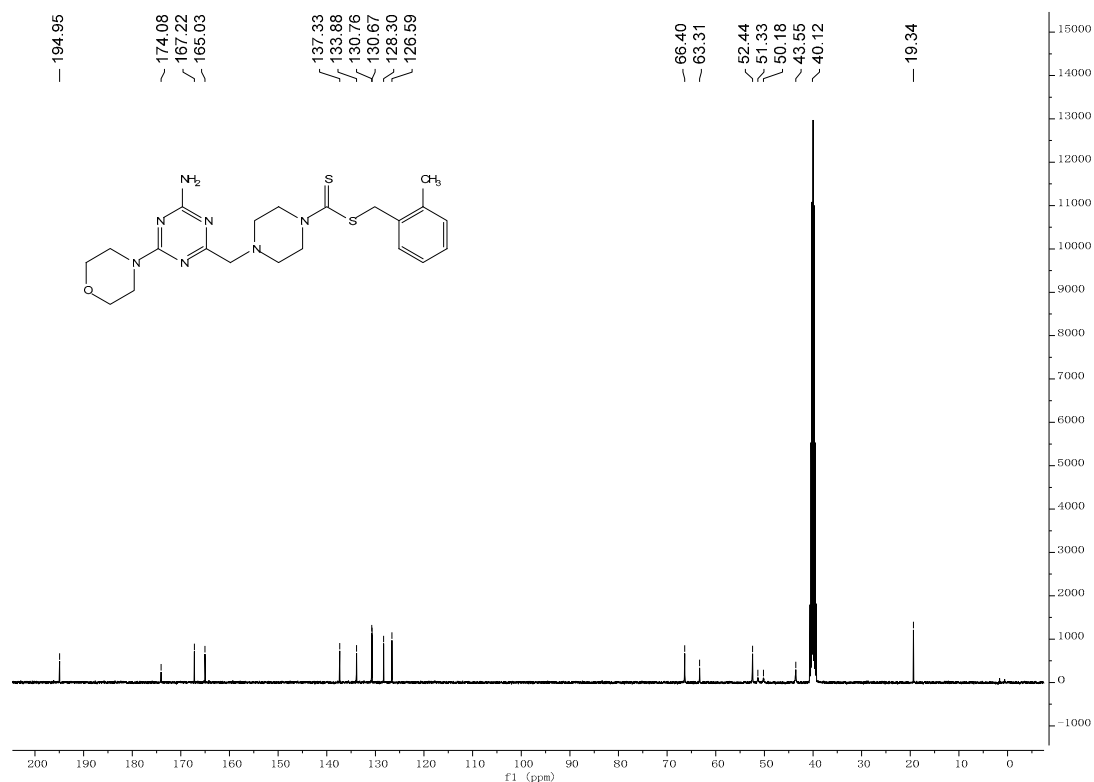

**Figure S16.** <sup>13</sup>C NMR (101 MHz, DMSO-*d*<sub>6</sub>) spectrum of compound C5.

72 #49 RT: 0.47 AV: 1 NL: 3.72E8  
T: FTMS + p ESI Full ms [100.0000-1300.0000]

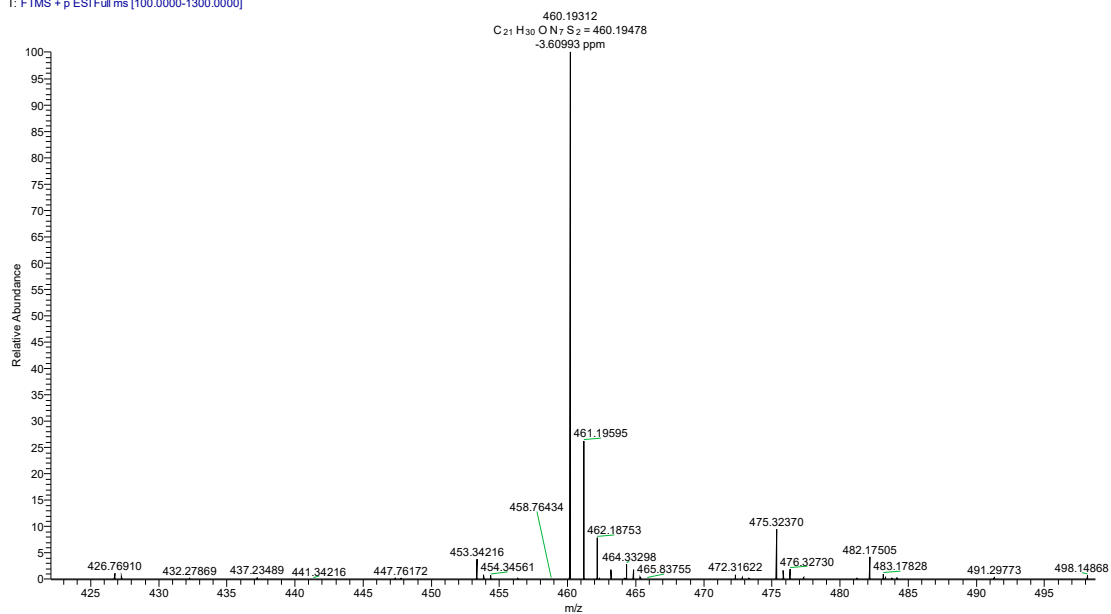

Figure S17. HRMS of compound C5.

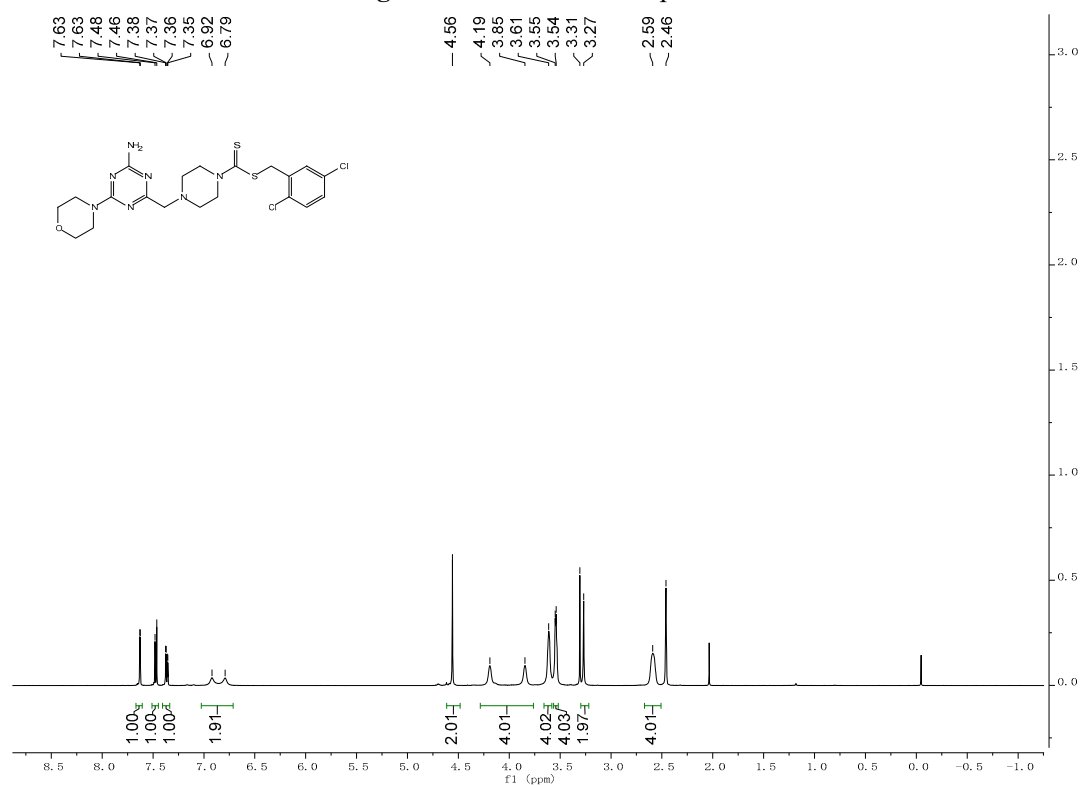

Figure S18. <sup>1</sup>H NMR (500 MHz, DMSO-*d*<sub>6</sub>) spectrum of compound C6.



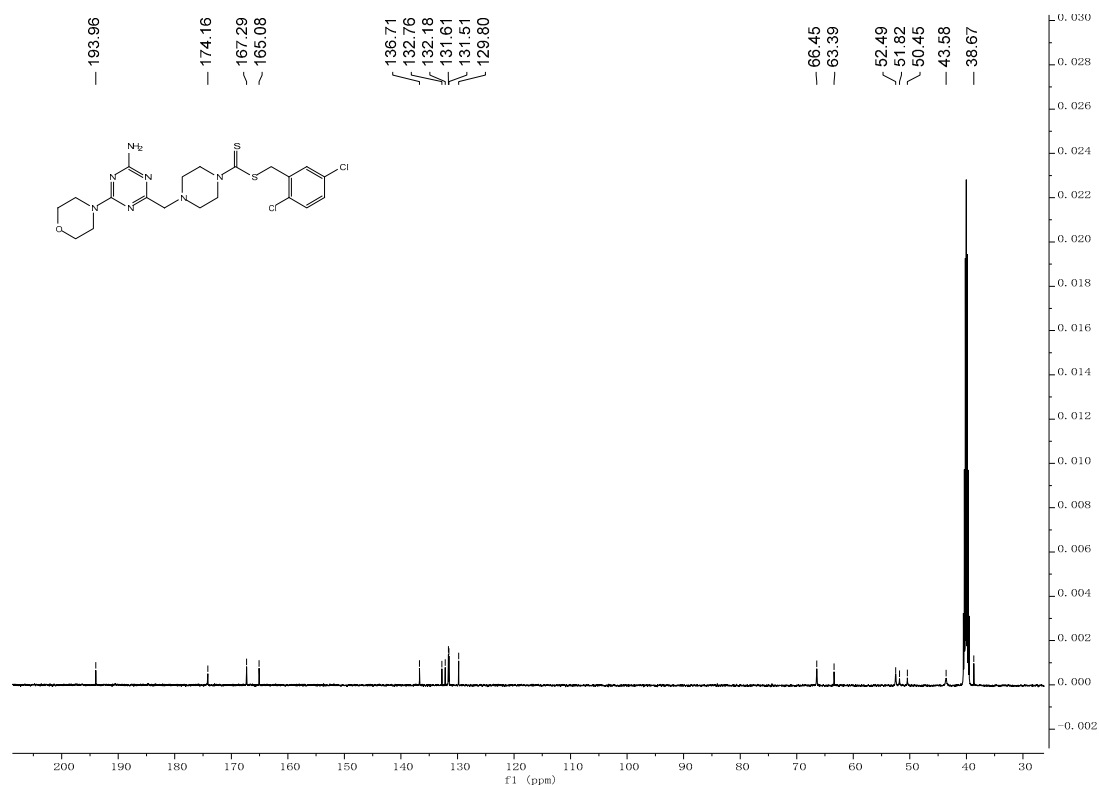

**Figure S19.** <sup>13</sup>C NMR (126 MHz, DMSO-*d*<sub>6</sub>) spectrum of compound C6.

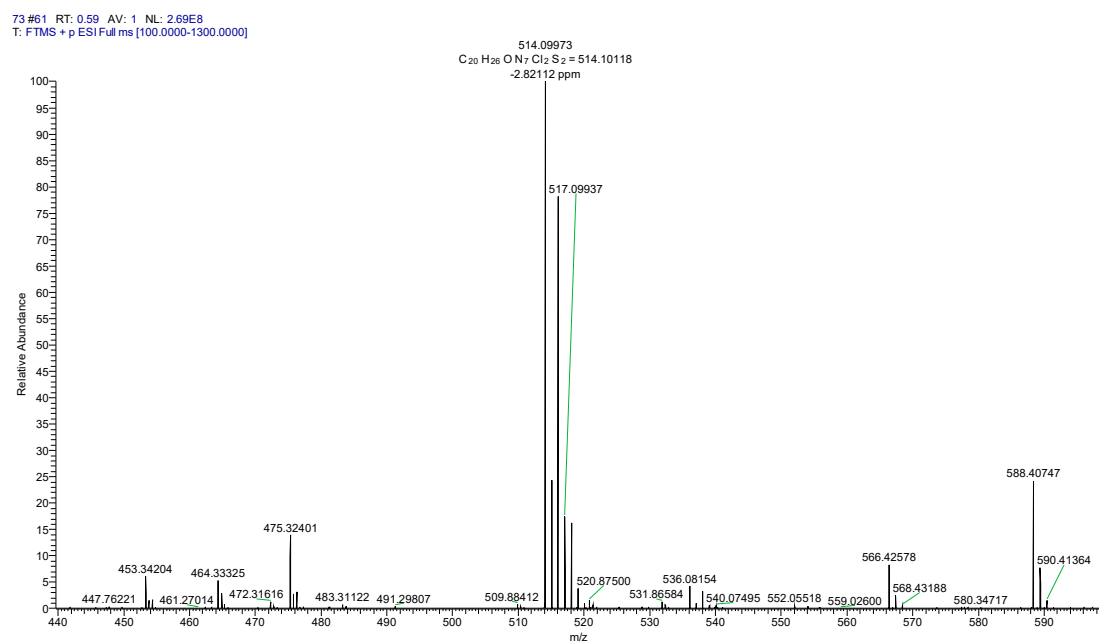

**Figure S20.** HRMS of compound C6.

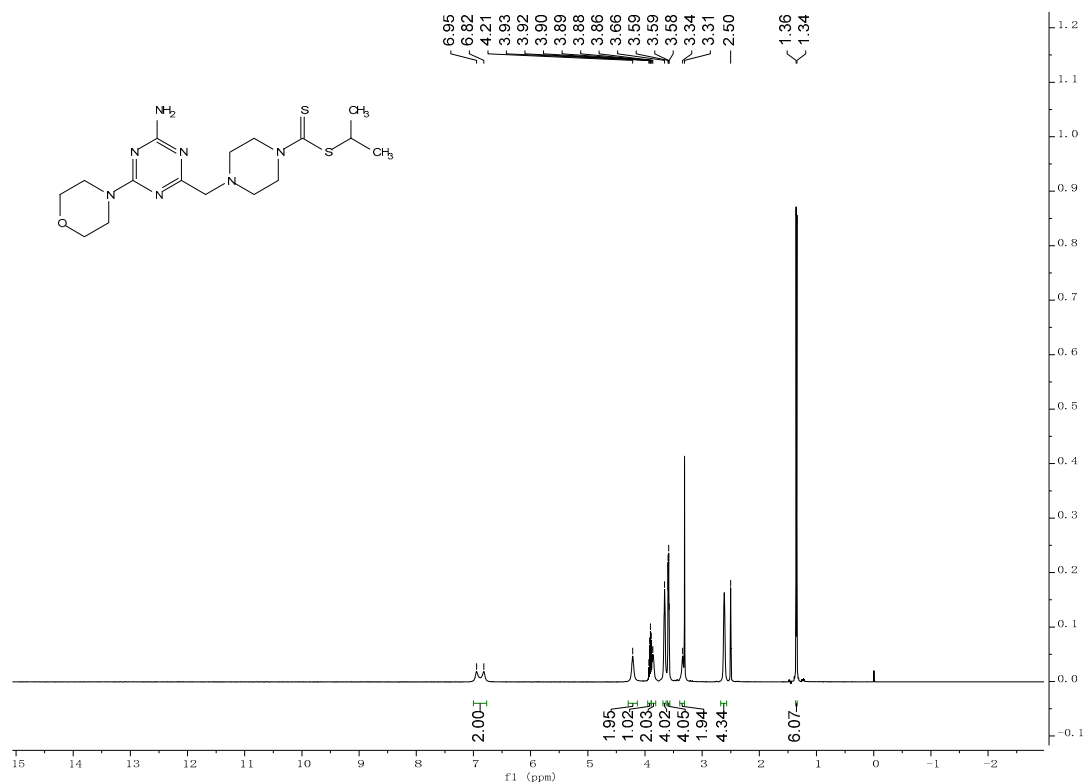

**Figure S21.** <sup>1</sup>H NMR (500 MHz, DMSO-*d*<sub>6</sub>) spectrum of compound C7.

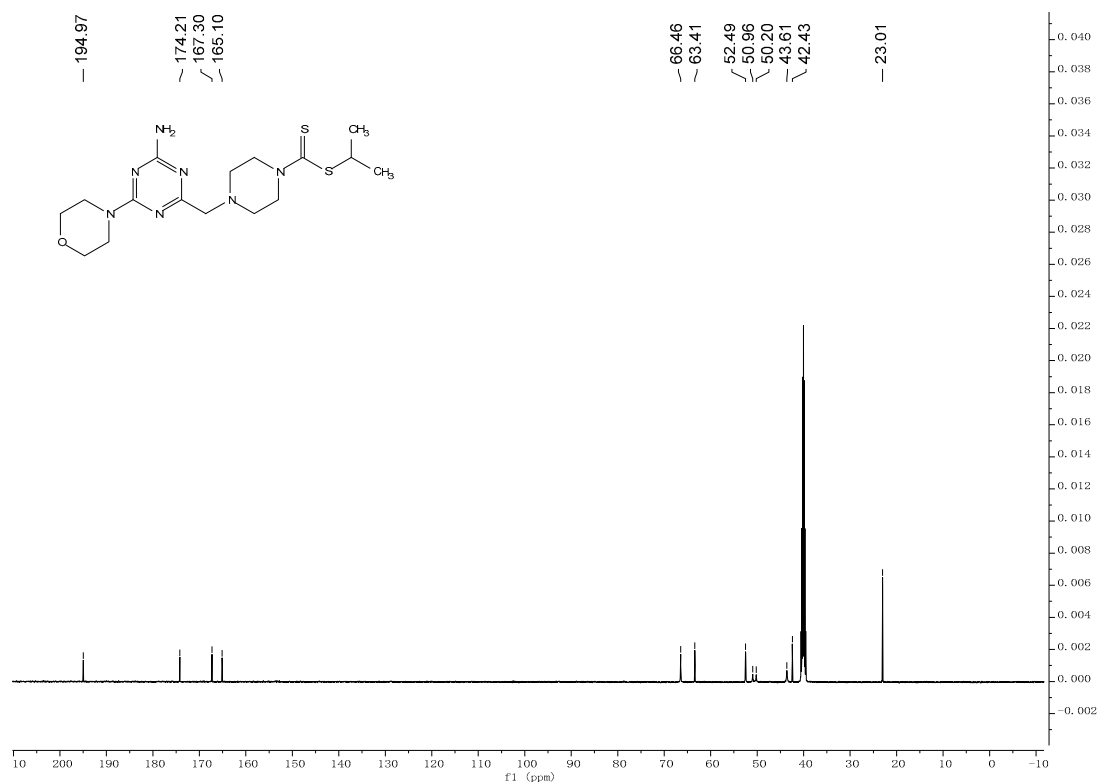

**Figure S22.** <sup>13</sup>C NMR (126 MHz, DMSO-*d*<sub>6</sub>) spectrum of compound C7.

190 #45-88 RT: 0.43-0.84 AV: 22 NL: 9.90E8  
T: FTMS + p ESI Full ms [100.0000-1300.0000]

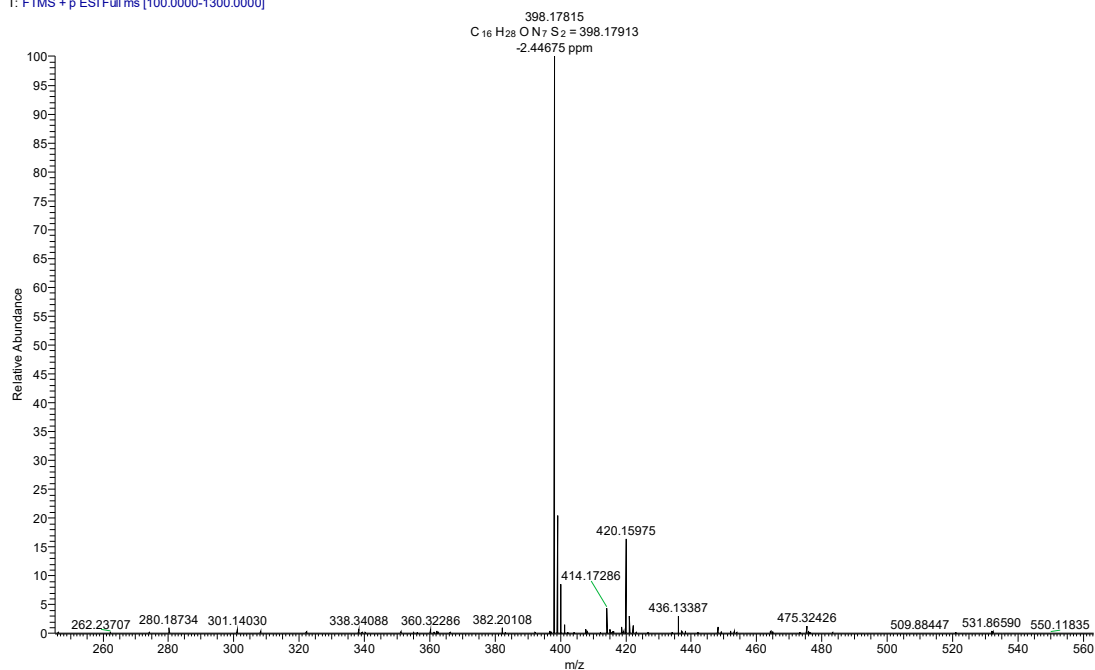

Figure S23. HRMS of compound C7.

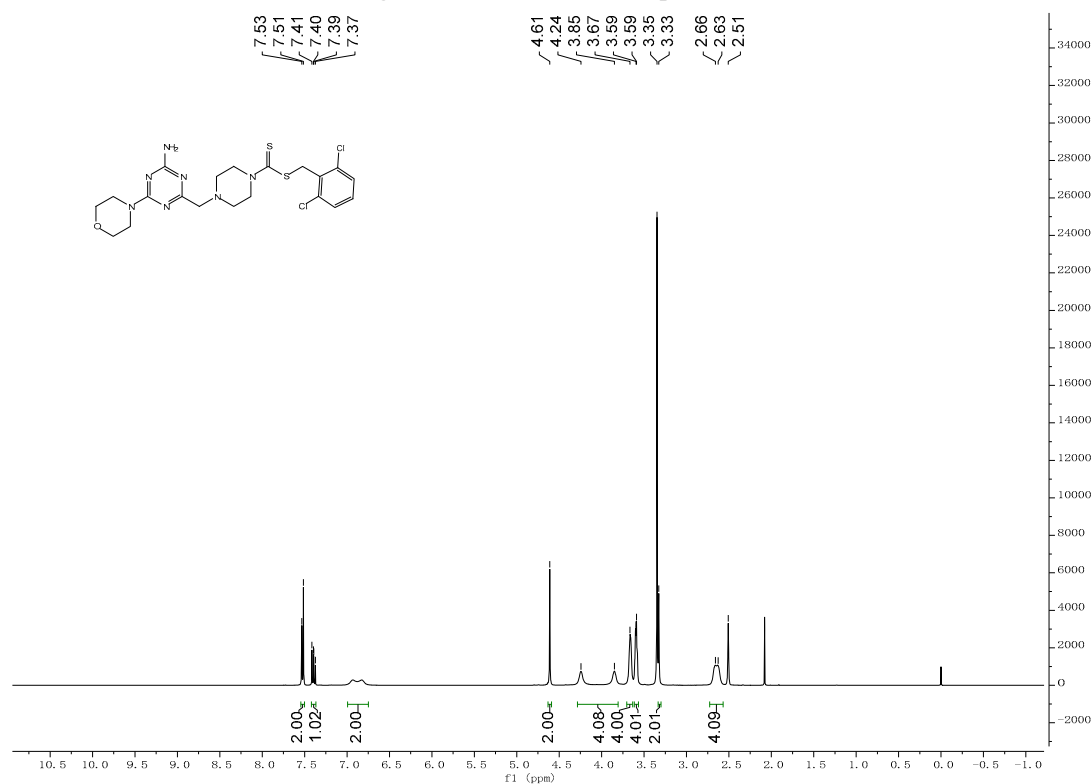

Figure S24. <sup>1</sup>H NMR (500 MHz, DMSO-*d*<sub>6</sub>) spectrum of compound C8.

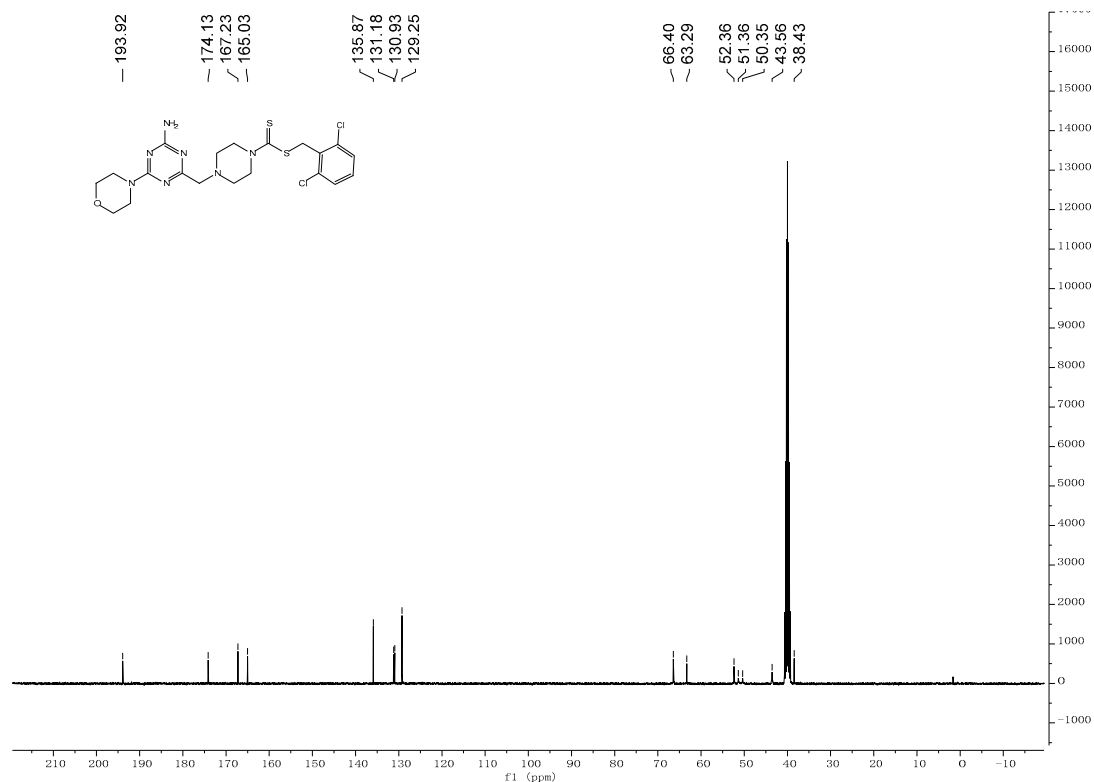

**Figure S25.** <sup>13</sup>C NMR (101 MHz, DMSO-*d*<sub>6</sub>) spectrum of compound C8.

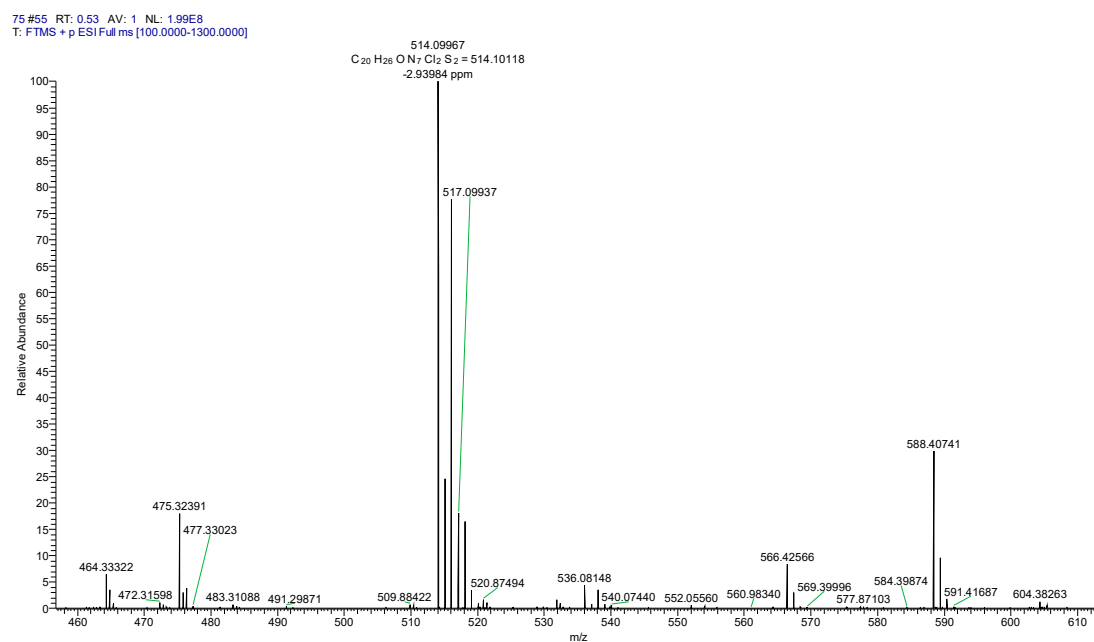

**Figure S26.** HRMS of compound C8.

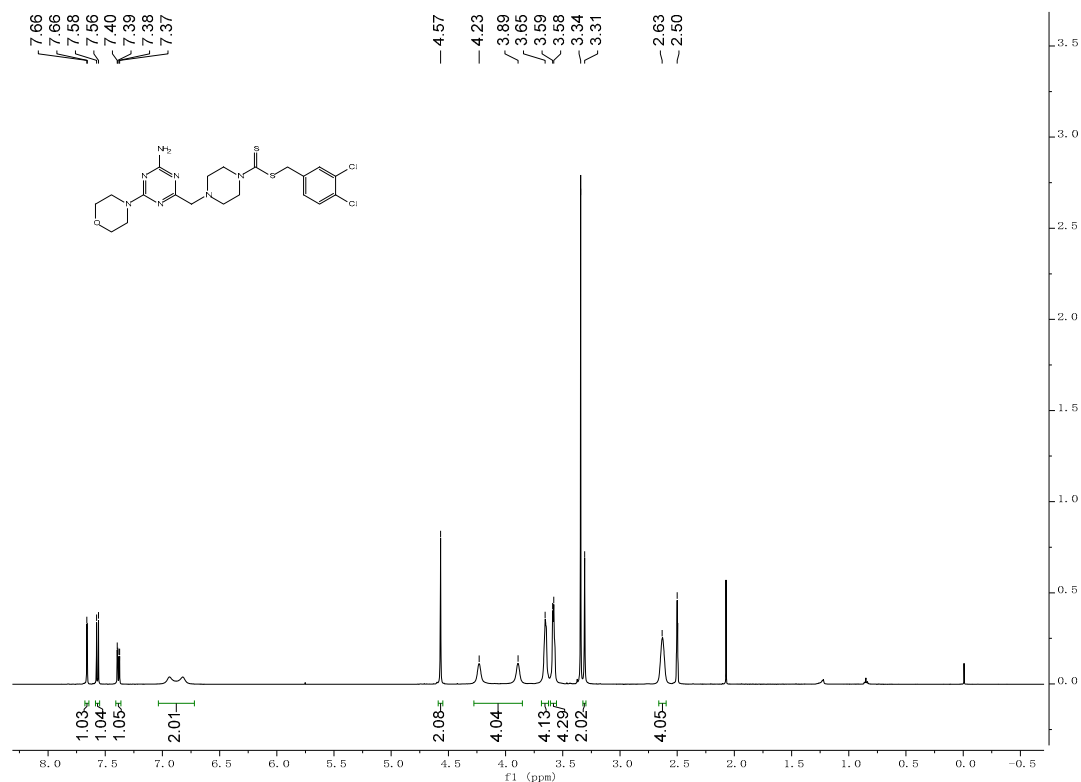

**Figure S27.** <sup>1</sup>H NMR (500 MHz, DMSO-*d*<sub>6</sub>) spectrum of compound C9.

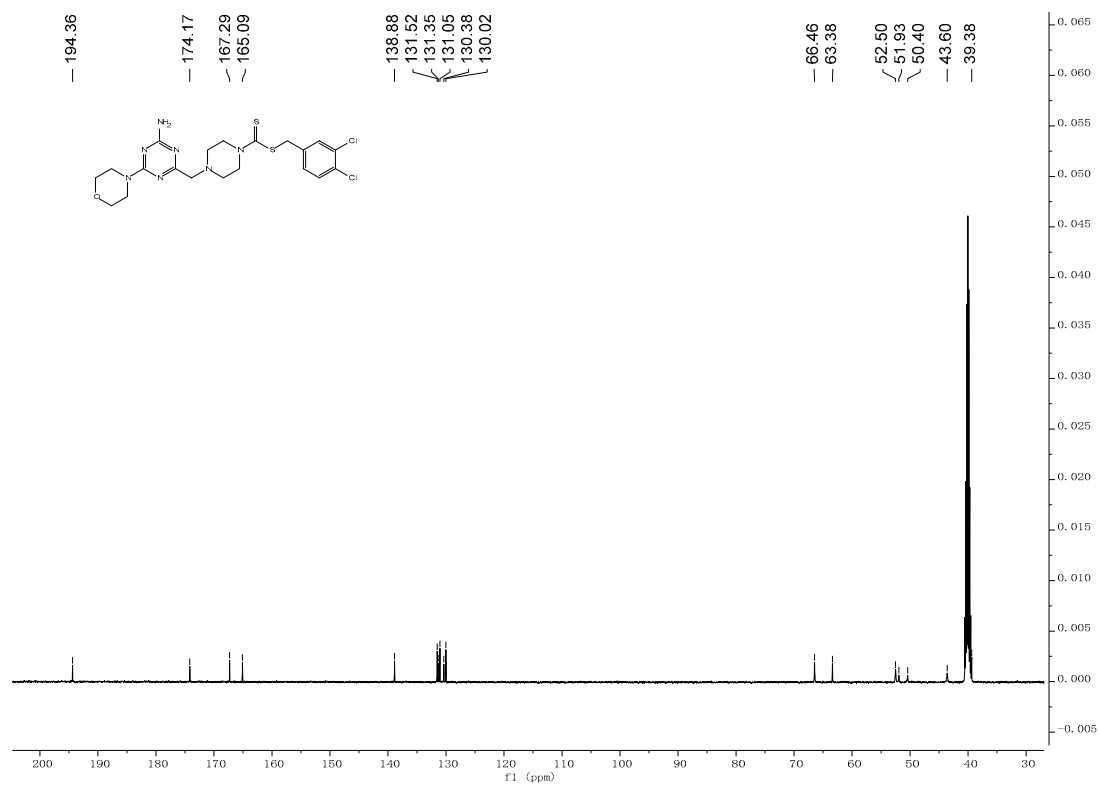

**Figure S28.** <sup>13</sup>C NMR (126 MHz, DMSO-*d*<sub>6</sub>) spectrum of compound C9.

76 #57 RT: 0.55 AV: 1 NL: 2.63E8  
T: FTMS + p ESI Full ms [100.0000-1300.0000]

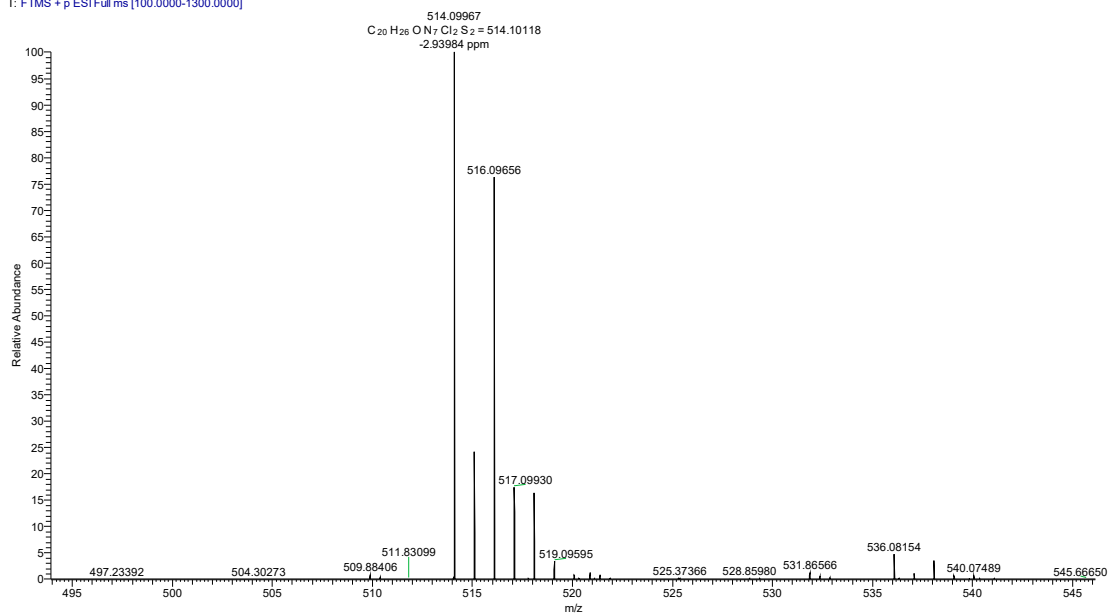

Figure S29. HRMS of compound C9.

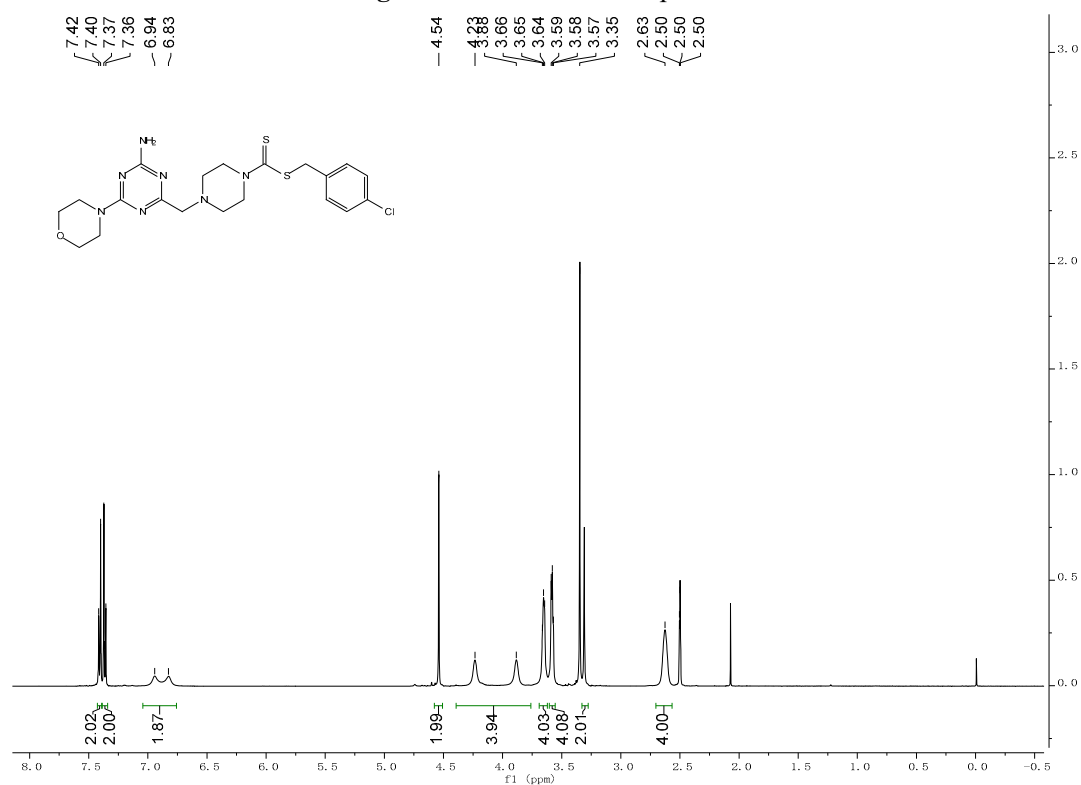

Figure S30. <sup>1</sup>H NMR (500 MHz, DMSO-*d*<sub>6</sub>) spectrum of compound C10.

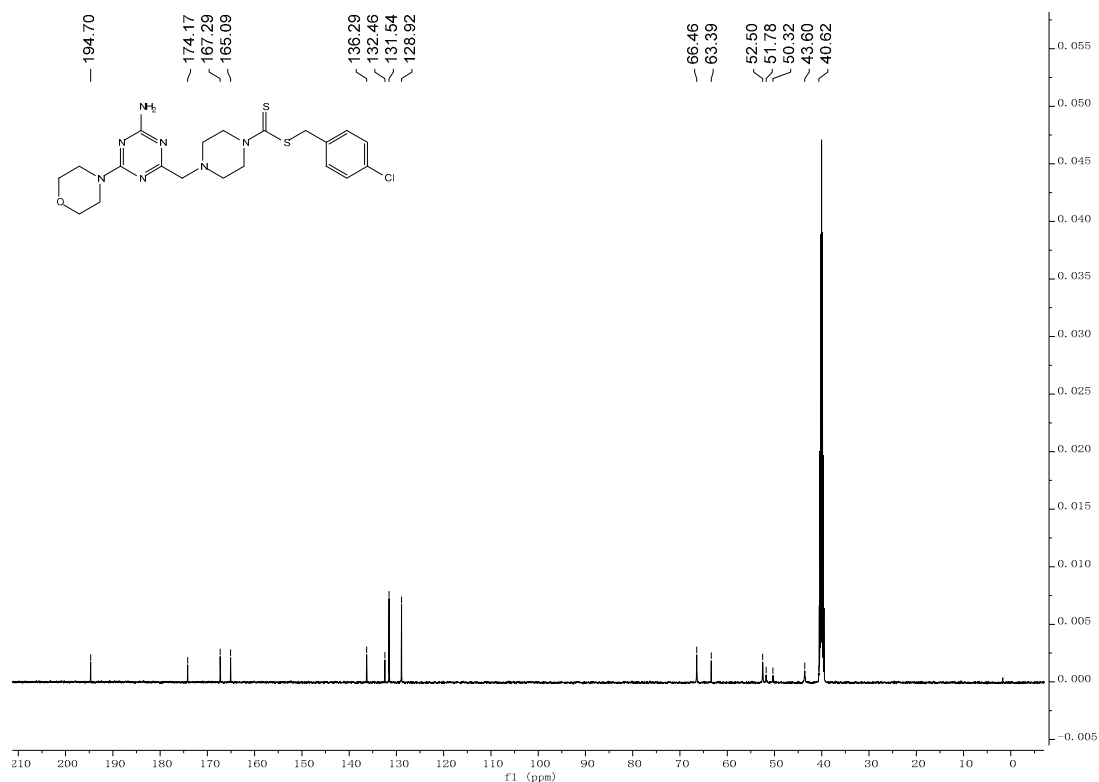

**Figure S31.** <sup>13</sup>C NMR (126 MHz, DMSO-*d*<sub>6</sub>) spectrum of compound C10.

77 #51 RT: 0.49 AV: 1 NL: 3.49E8

T: FTMS + p ESI Full ms [100.0000-1300.0000]

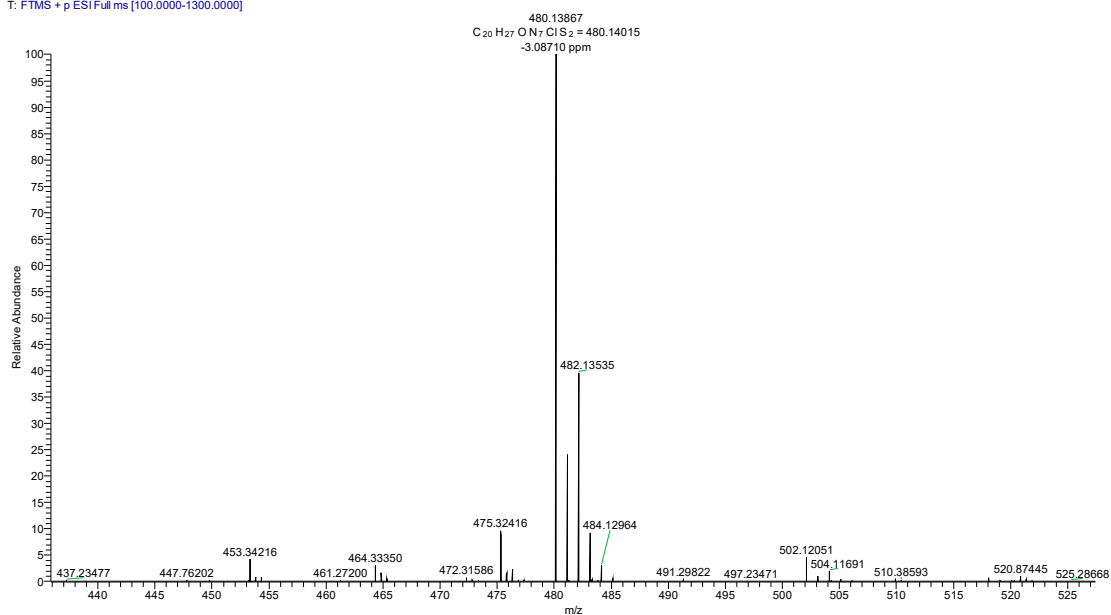

**Figure S32.** HRMS of compound C10.

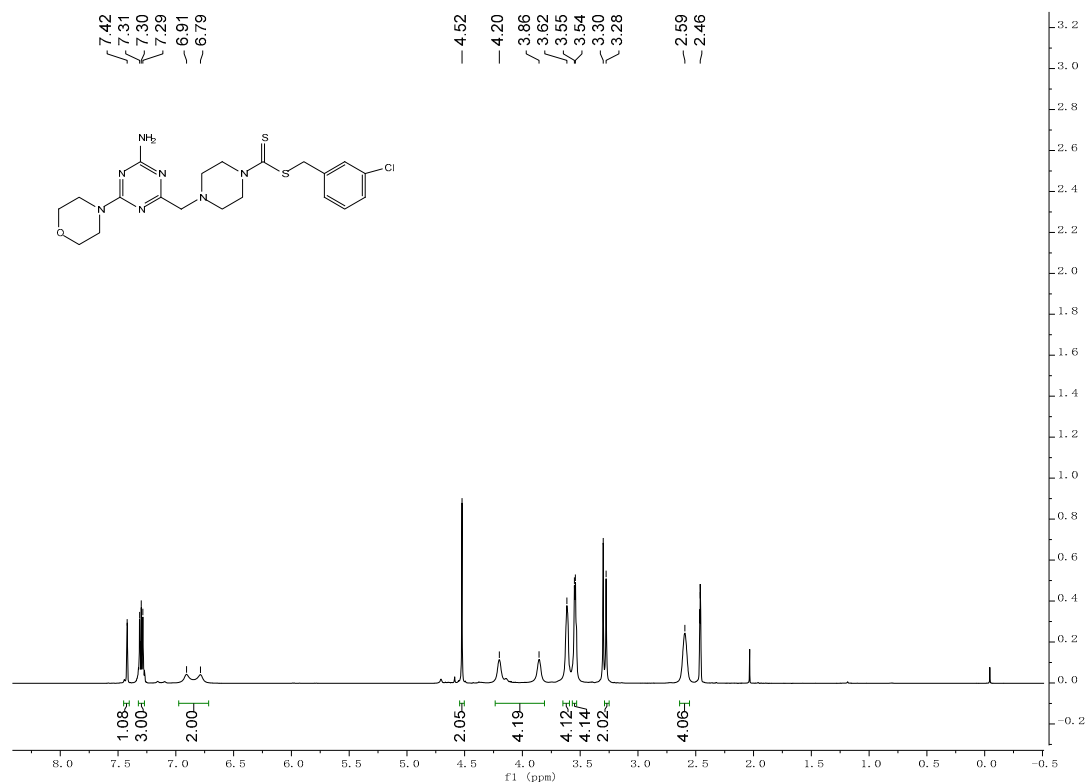

**Figure S33.** <sup>1</sup>H NMR (500 MHz, DMSO-*d*<sub>6</sub>) spectrum of compound C11.

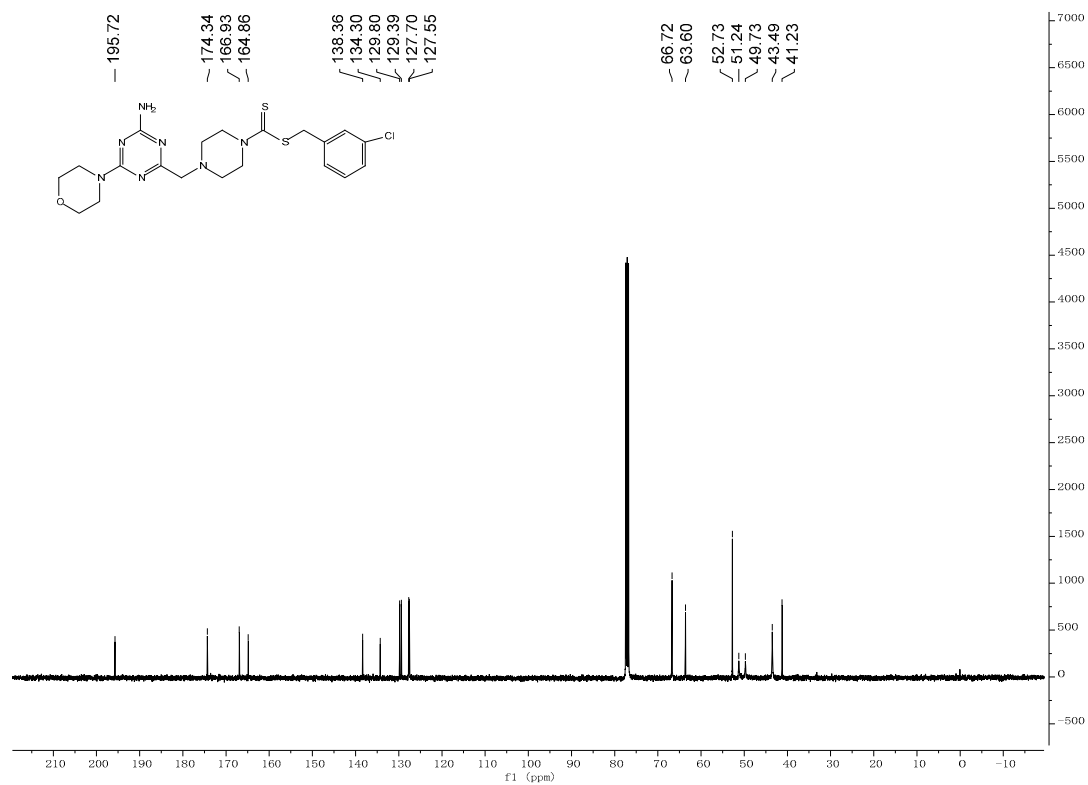

**Figure S34.** <sup>13</sup>C NMR (101 MHz, DMSO-*d*<sub>6</sub>) spectrum of compound C11.



78 #47 RT: 0.46 AV: 1 NL: 6.70E8  
T: FTMS + p ESI Full ms [100.0000-1300.0000]

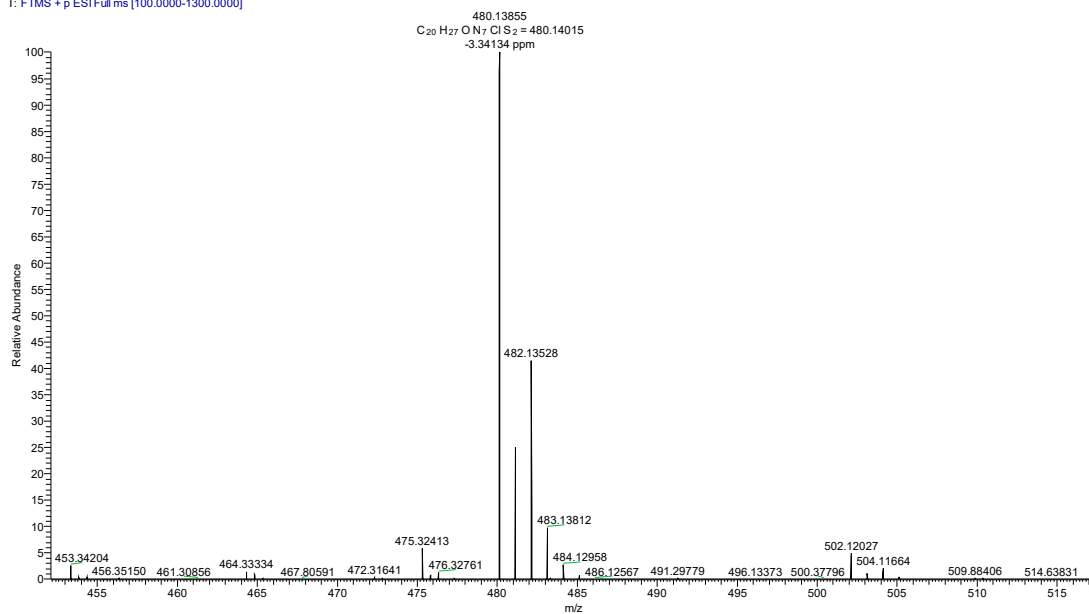

Figure S35. HRMS of compound C11.

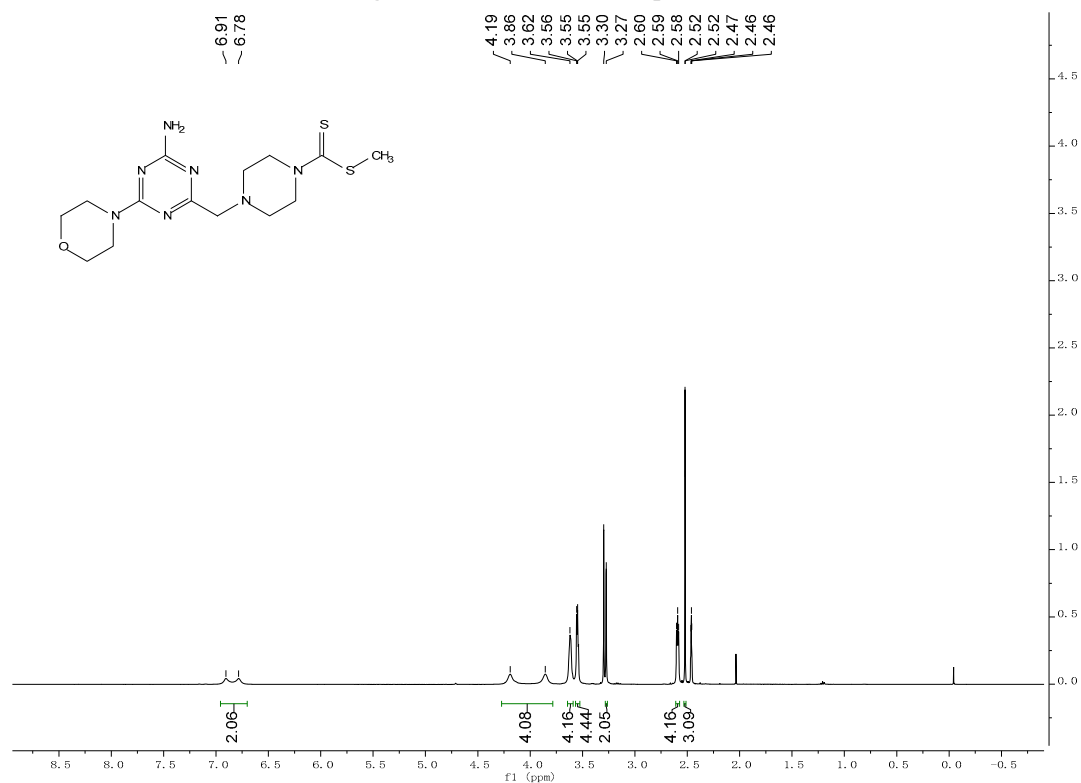

Figure S36. <sup>1</sup>H NMR (500 MHz, DMSO-*d*<sub>6</sub>) spectrum of compound C12.

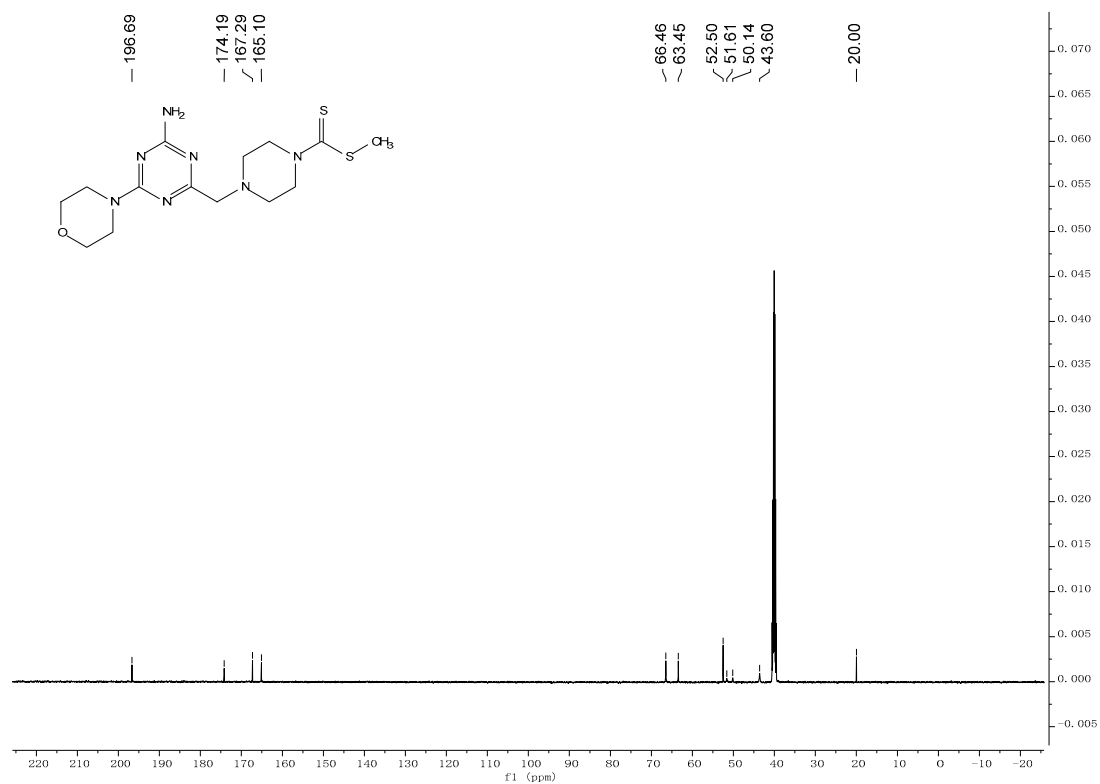

**Figure S37.** <sup>13</sup>C NMR (126 MHz, DMSO-*d*<sub>6</sub>) spectrum of compound C12.

79 #37 RT: 0.36 AV: 1 NL: 1.01E9  
T: FTMS + p ESI Full ms [100.0000-1300.0000]

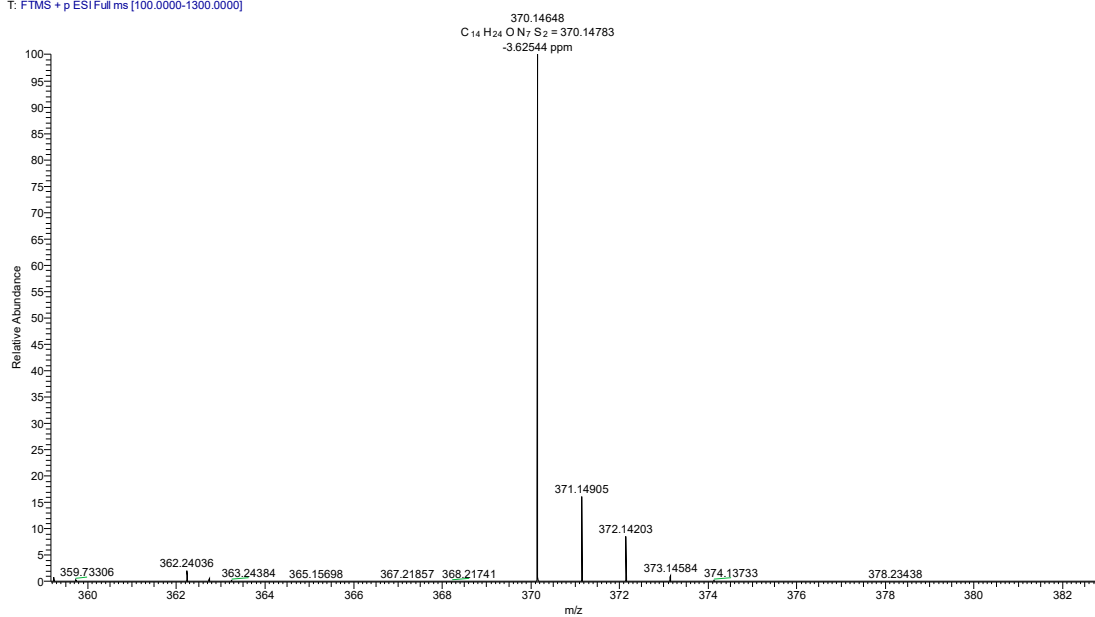

**Figure S38.** HRMS of compound C12.

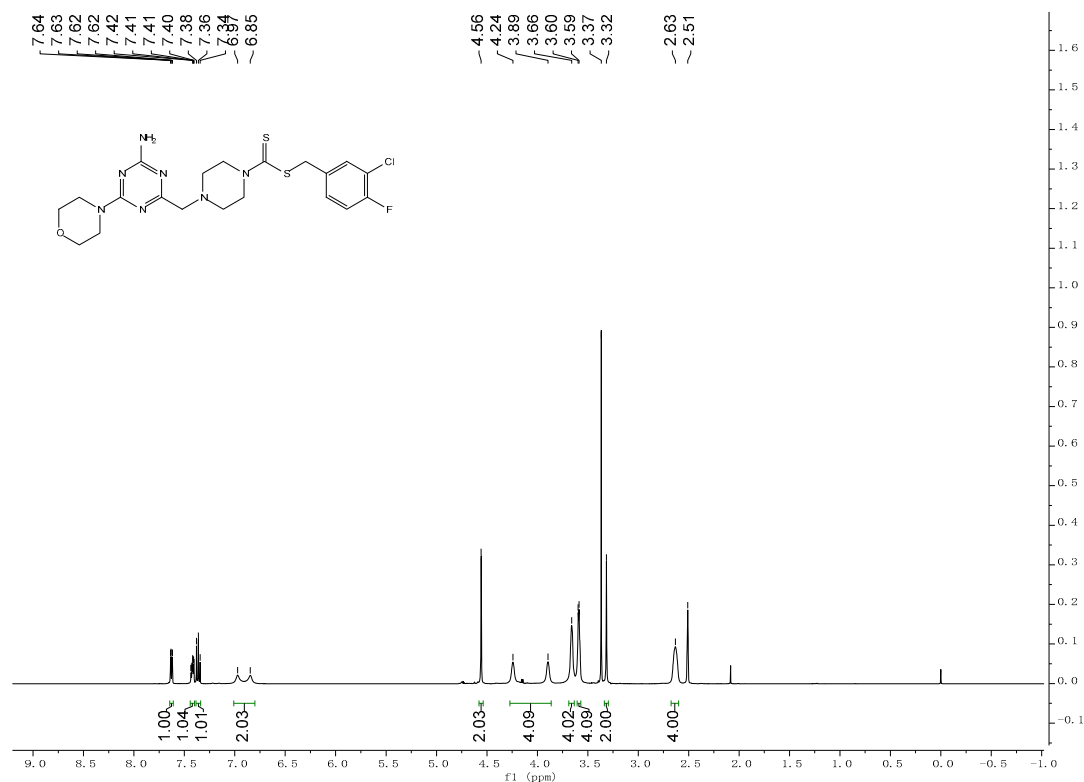

Figure S39. <sup>1</sup>H NMR (500 MHz, DMSO-*d*<sub>6</sub>) spectrum of compound C13.

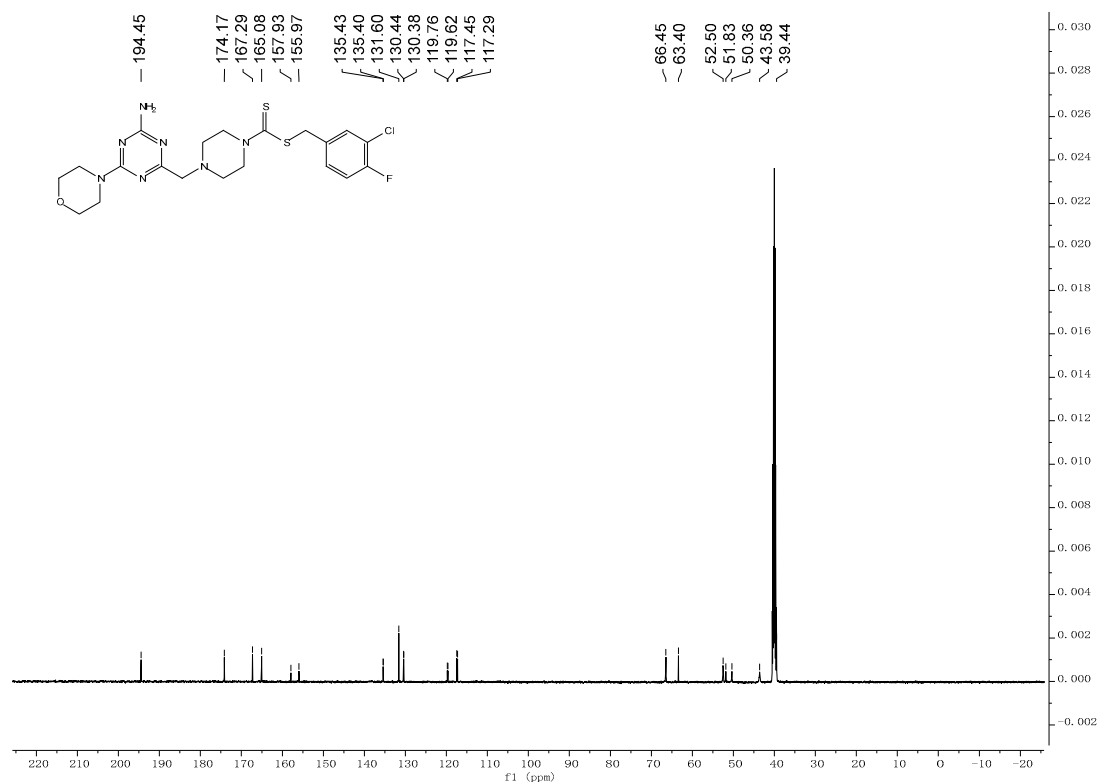

Figure S40. <sup>13</sup>C NMR (126 MHz, DMSO-*d*<sub>6</sub>) spectrum of compound C13.

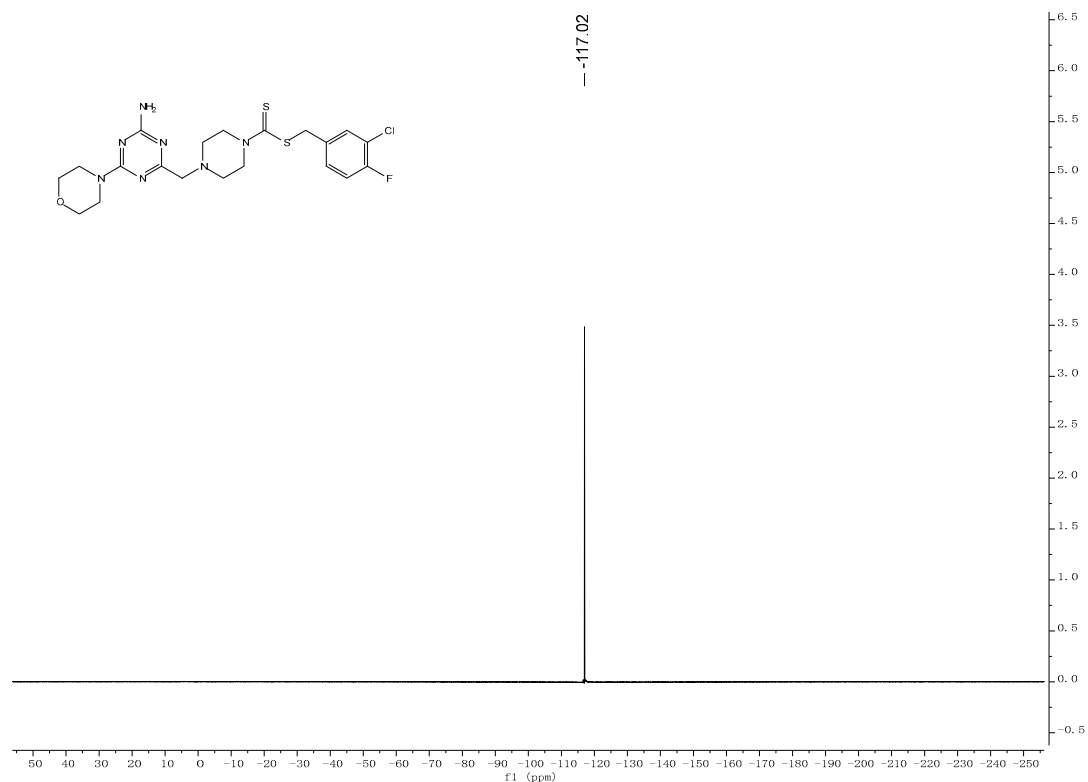

**Figure S41.**  $^{19}\text{F}$  NMR (471 MHz,  $\text{CDCl}_3$ ) spectrum of compound C13.

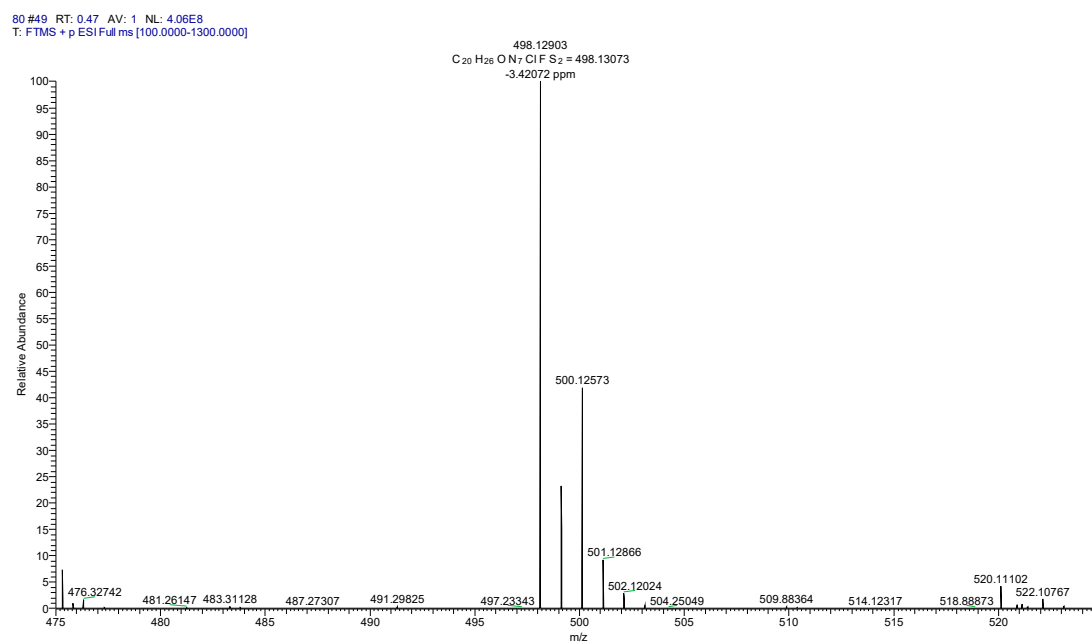

**Figure S42.** HRMS of compound C13.

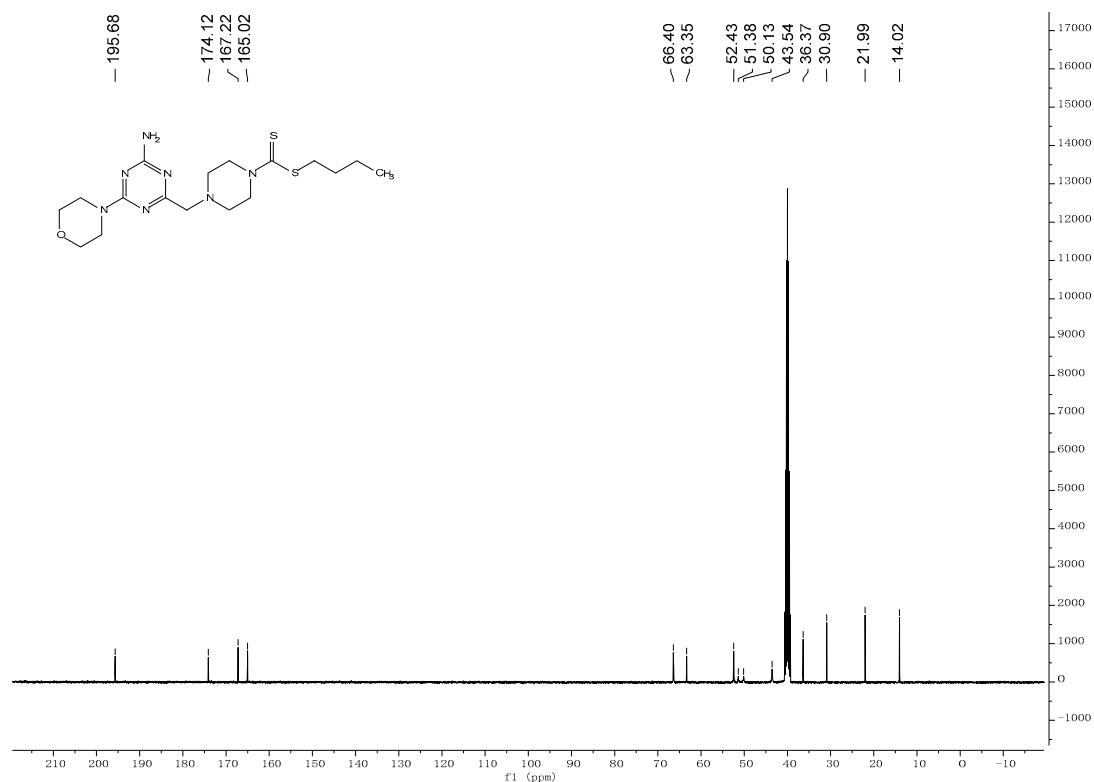

**Figure S43.** <sup>1</sup>H NMR (500 MHz, DMSO-*d*<sub>6</sub>) spectrum of compound C14.

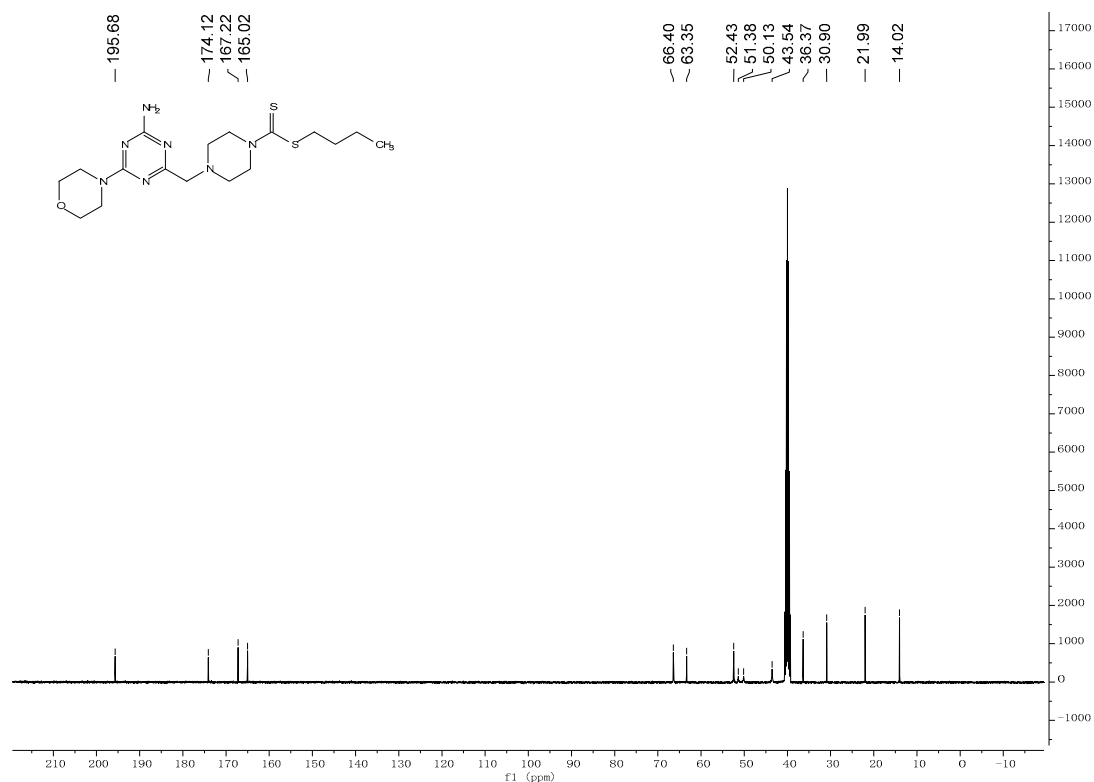

**Figure S44.** <sup>13</sup>C NMR (101 MHz, DMSO-*d*<sub>6</sub>) spectrum of compound C14.

Relative Abundance

412.19315  
C<sub>17</sub>H<sub>30</sub>ON<sub>7</sub>S<sub>2</sub> = 412.19478  
-3.95627 ppm

413.19553  
414.18832  
415.19226  
416.27478  
417.28024  
418.78143  
419.78360

407.79184  
408.79495  
410.17645  
411.07382

m/z

Chemical structure of compound 10: Cc1ccc(cc1)SC(=S)N2CCN(CC2)CN3C=NC(=N3)N4CCOCC4

<sup>1</sup>H NMR spectrum (CDCl<sub>3</sub>) of compound 10. The x-axis represents the chemical shift in ppm, ranging from -1.0 to 2.0. The y-axis represents the intensity. The spectrum shows several peaks, with integration values indicated below the baseline and chemical shifts listed at the top.

Chemical shifts (ppm): 7.13, 7.13, 7.09, 7.09, 7.08, 7.07, 7.06, 7.05, 6.97, 6.84, 4.41, 4.23, 3.86, 3.65, 3.59, 3.58, 3.36, 3.30, 2.60, 2.50, 2.50, 2.17.

Integration values: 1.00, 2.04, 2.00, 2.01, 4.00, 4.00, 4.00, 2.00, 4.01, 6.00.

46

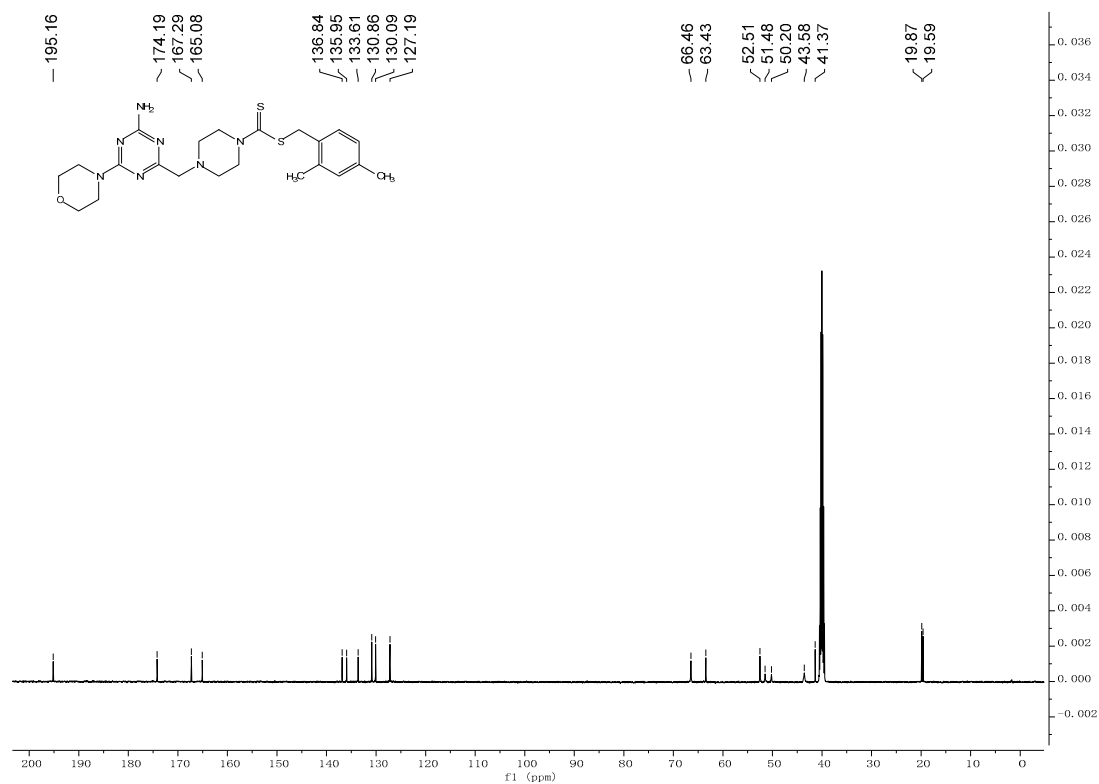

**Figure S47.** <sup>13</sup>C NMR (126 MHz, DMSO-*d*<sub>6</sub>) spectrum of compound C15.

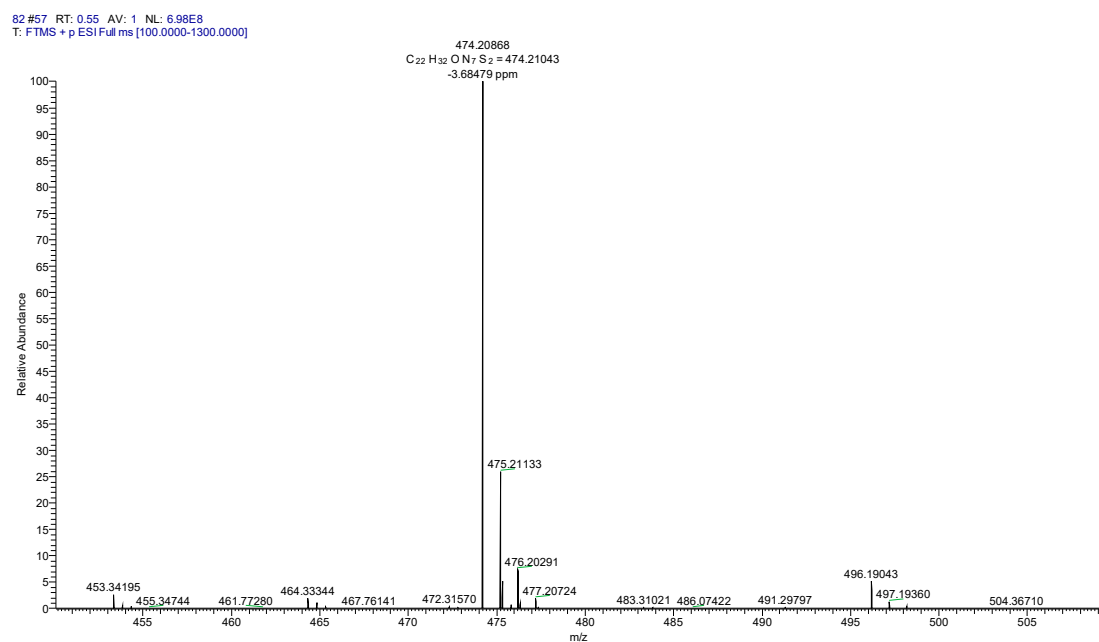

**Figure S48.** HRMS of compound C15.

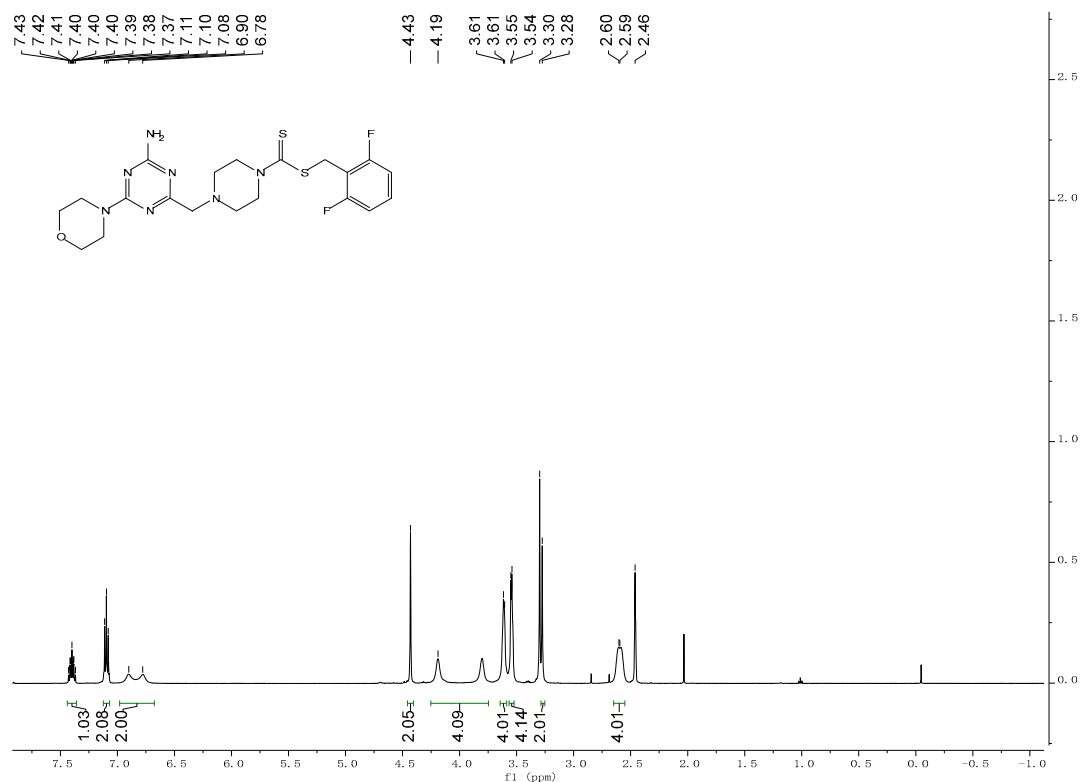

**Figure S49.** <sup>1</sup>H NMR (500 MHz, DMSO-*d*<sub>6</sub>) spectrum of compound C16.

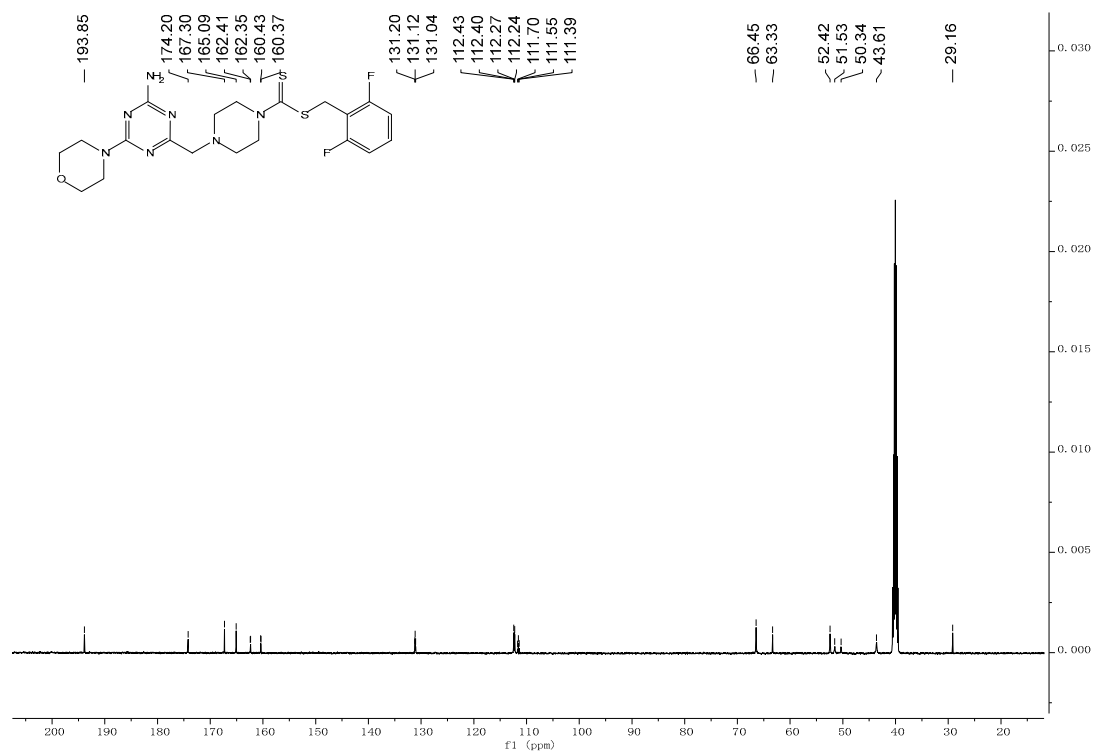

**Figure S50.** <sup>13</sup>C NMR (126 MHz, DMSO-*d*<sub>6</sub>) spectrum of compound C16.



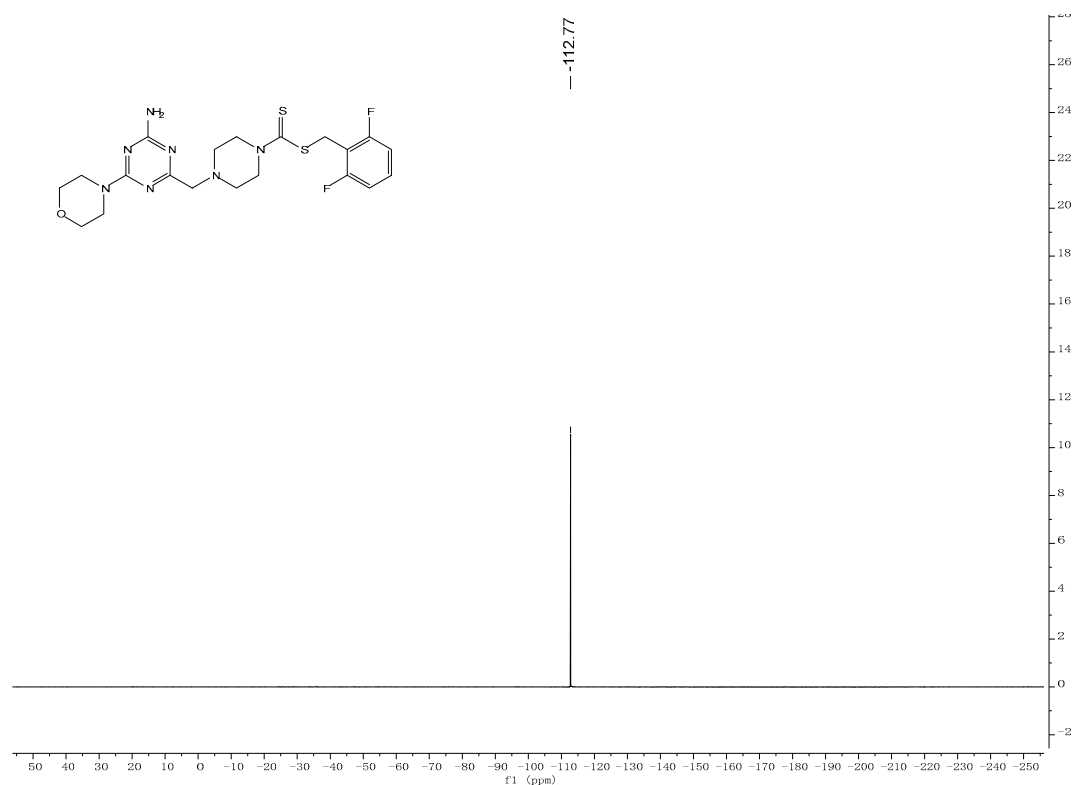

**Figure S51.**  $^{19}\text{F}$  NMR (471 MHz,  $\text{CDCl}_3$ ) spectrum of compound C16.

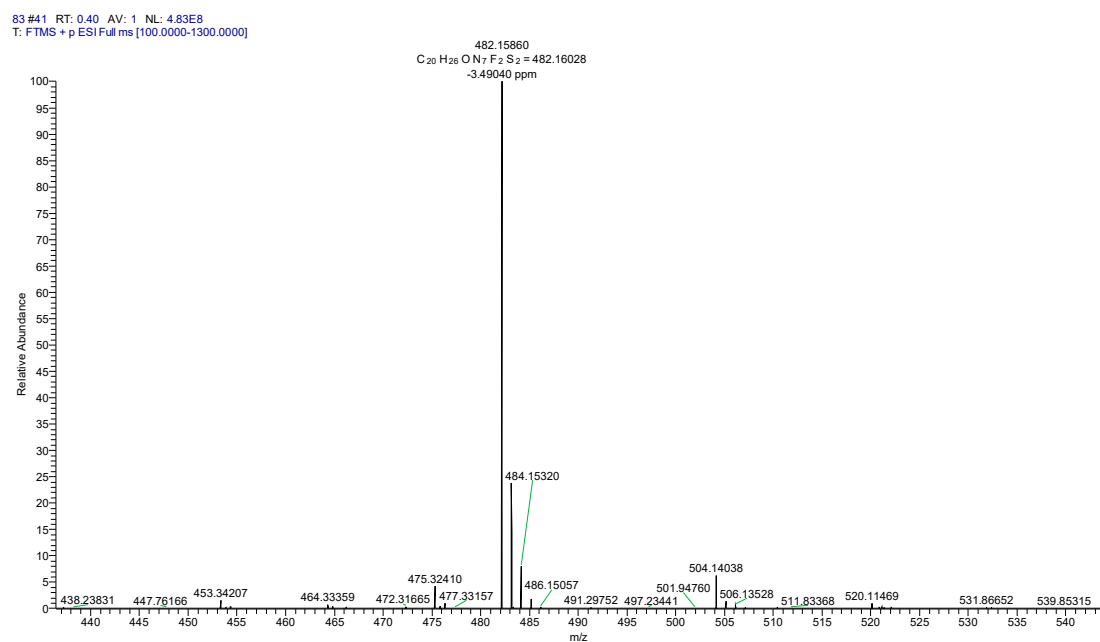

**Figure S52.** HRMS of compound C16.

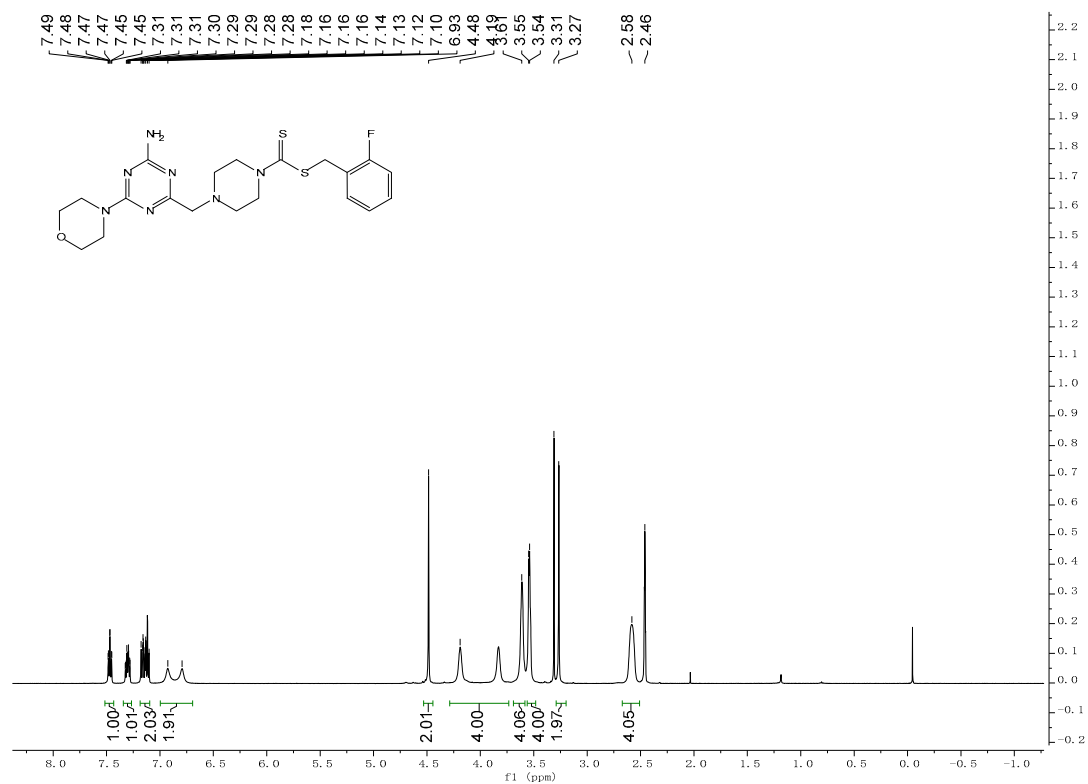

Figure S53. <sup>1</sup>H NMR (500 MHz, DMSO-*d*<sub>6</sub>) spectrum of compound C17.

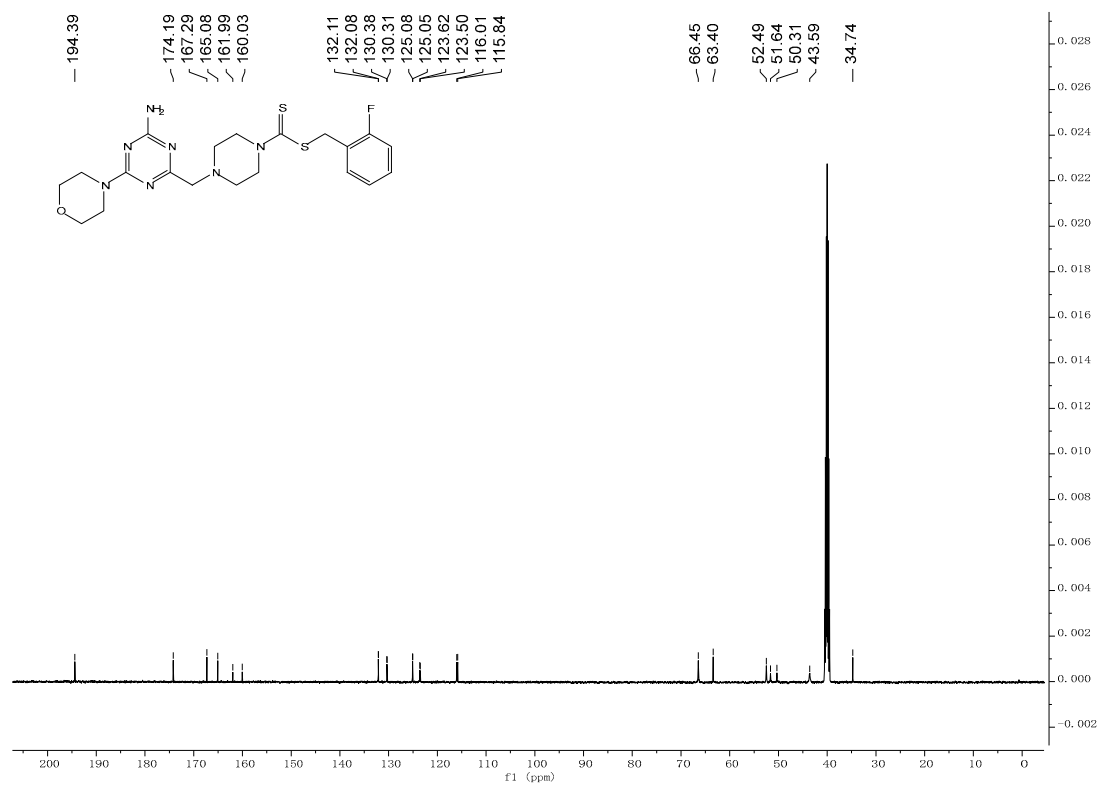

Figure S54. <sup>13</sup>C NMR (126 MHz, DMSO-*d*<sub>6</sub>) spectrum of compound C17.



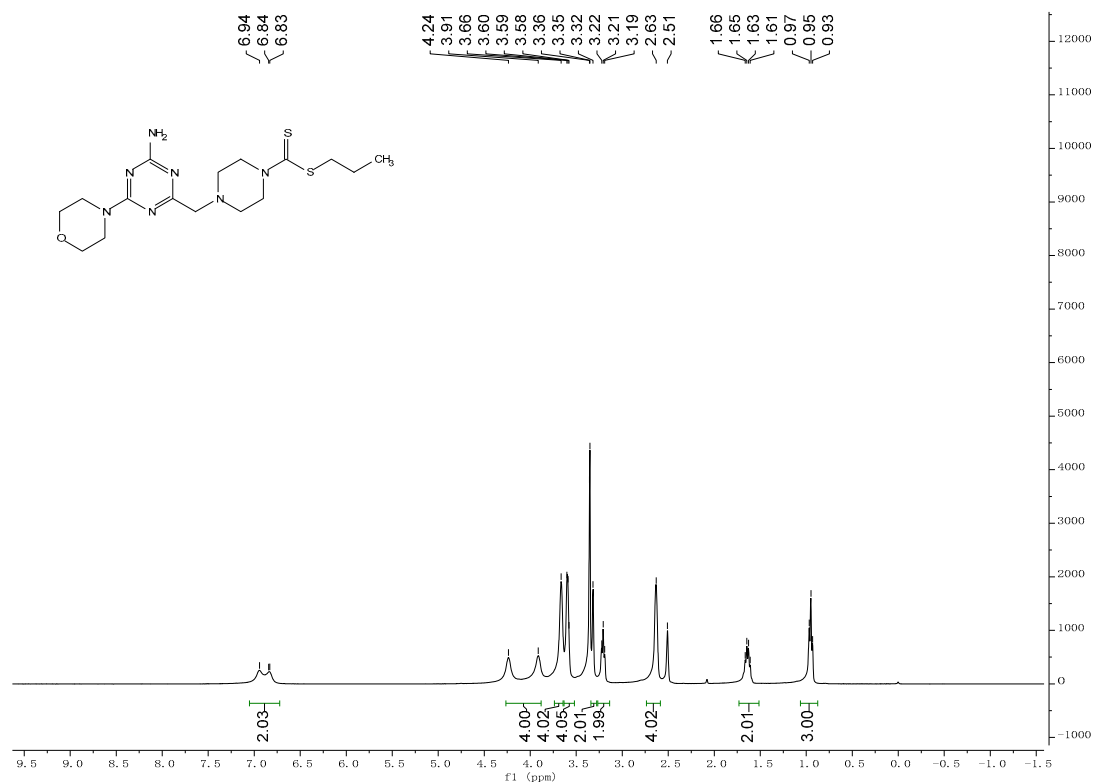

**Figure S57.** <sup>1</sup>H NMR (500 MHz, DMSO-*d*<sub>6</sub>) spectrum of compound C18.

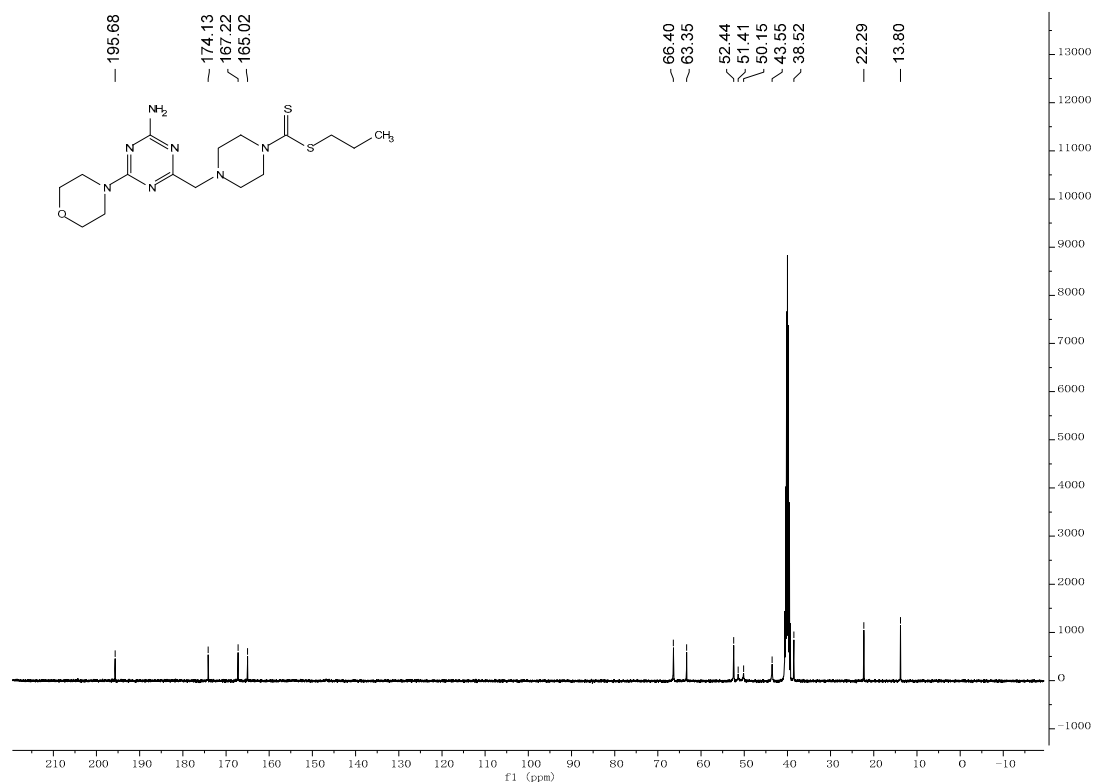

**Figure S58.** <sup>13</sup>C NMR (126 MHz, DMSO-*d*<sub>6</sub>) spectrum of compound C18.

85 #43 RT: 0.42 AV: 1 NL: 1.42E9  
T: FTMS + p ESI Full ms [100.0000-1300.0000]

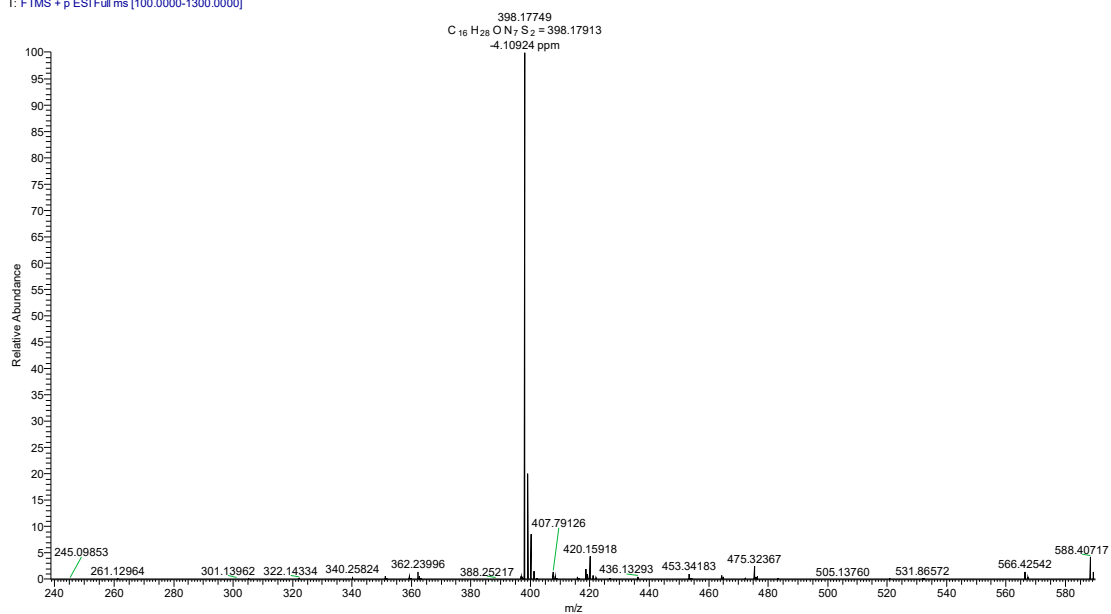

Figure S59. HRMS of compound C18.

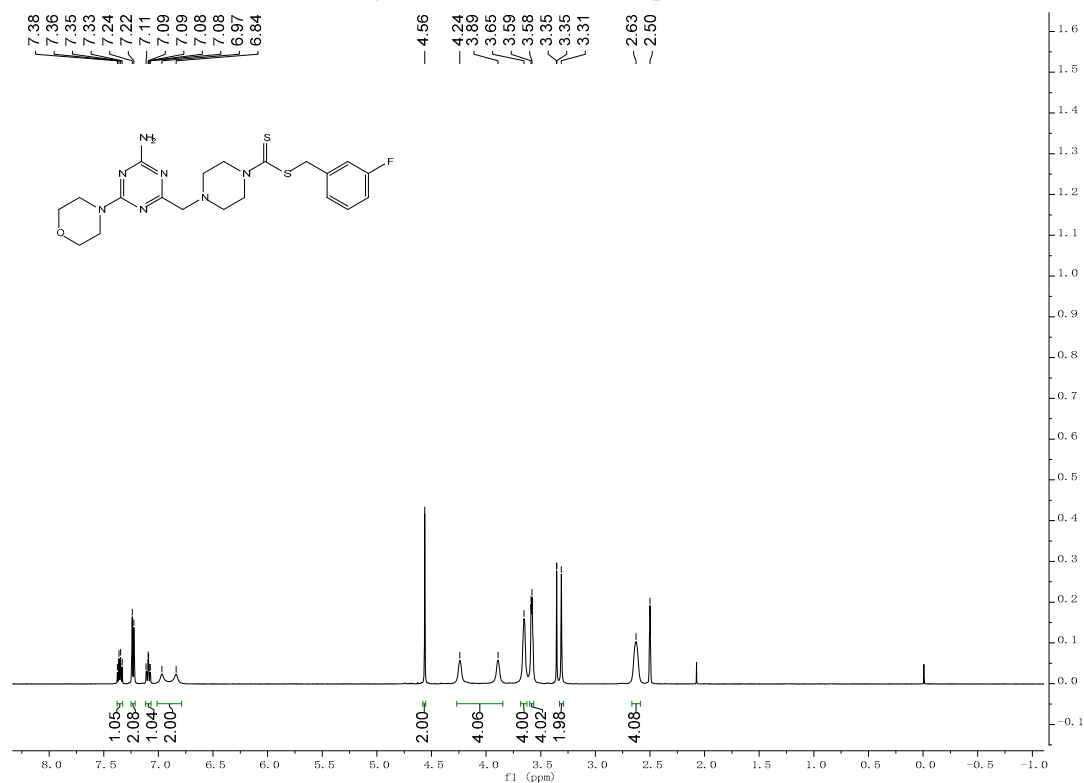

Figure S60. <sup>1</sup>H NMR (500 MHz, DMSO-*d*<sub>6</sub>) spectrum of compound C19.

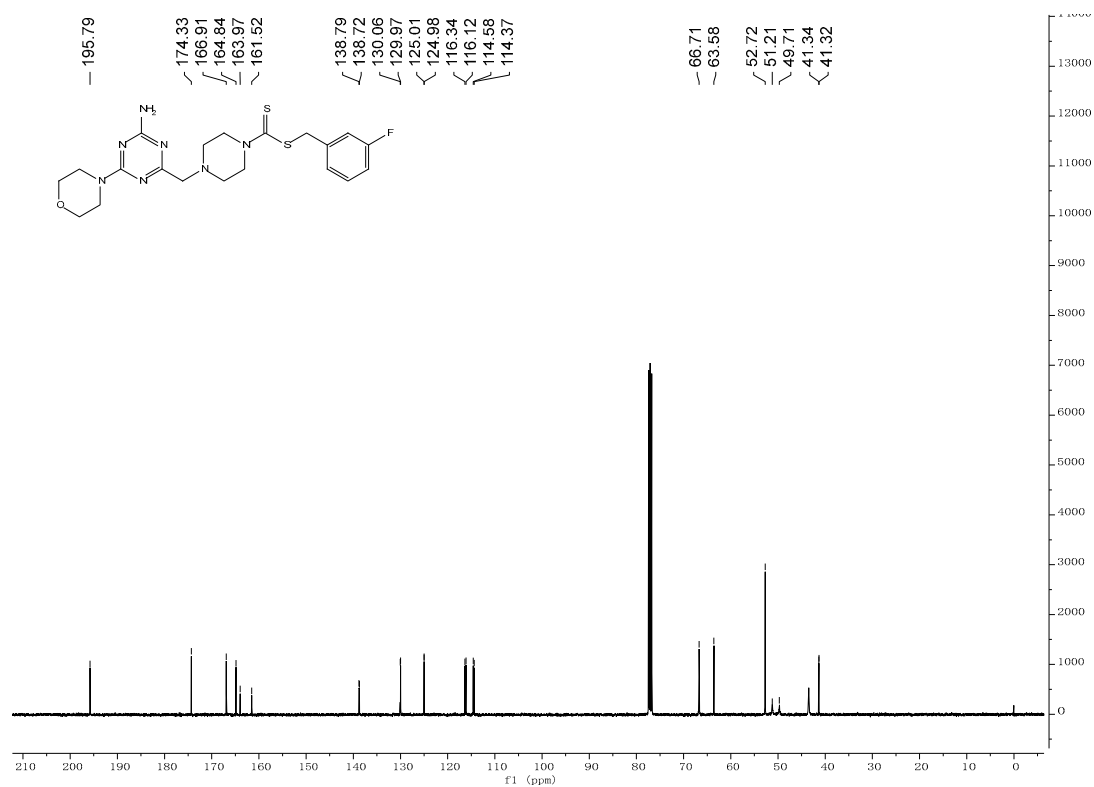

**Figure S61.** <sup>13</sup>C NMR (126 MHz, DMSO-*d*<sub>6</sub>) spectrum of compound C19.

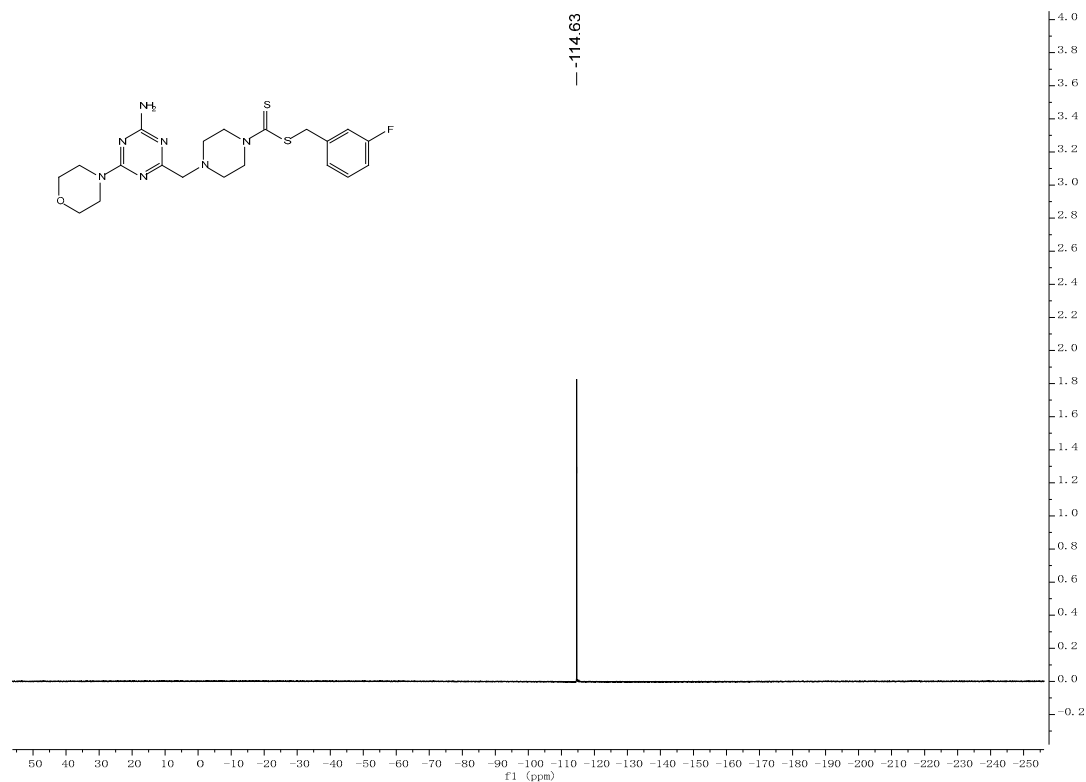

**Figure S62.** <sup>19</sup>F NMR (471 MHz, CDCl<sub>3</sub>) spectrum of compound C19.

86 #41 RT: 0.40 AV: 1 NL: 6.95E8  
T: FTMS + p ESI Full ms [100.0000-1300.0000]

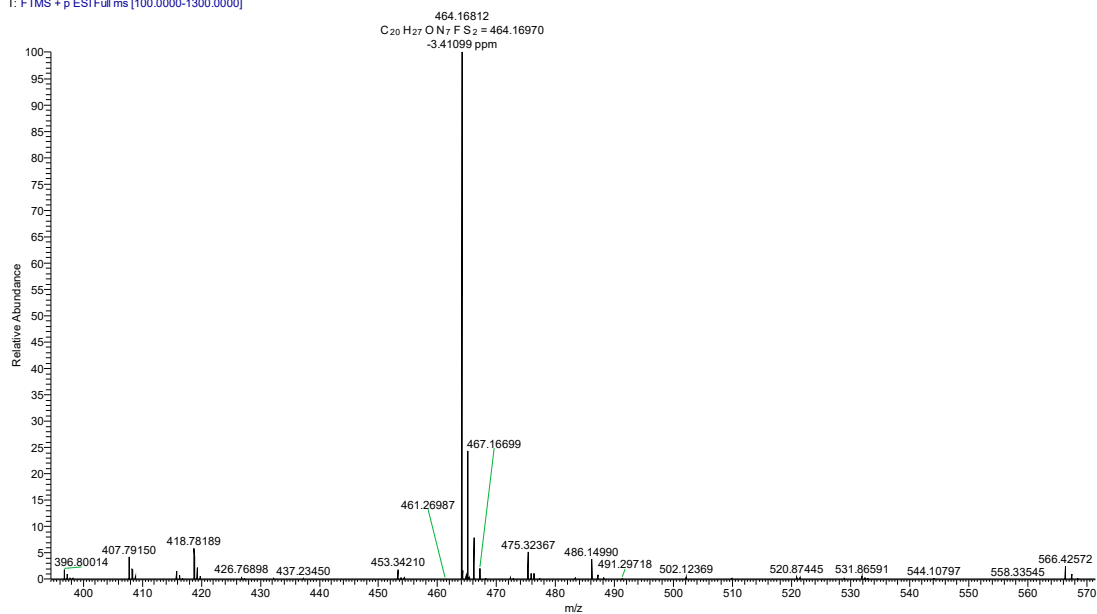

Figure S63. HRMS of compound C19.

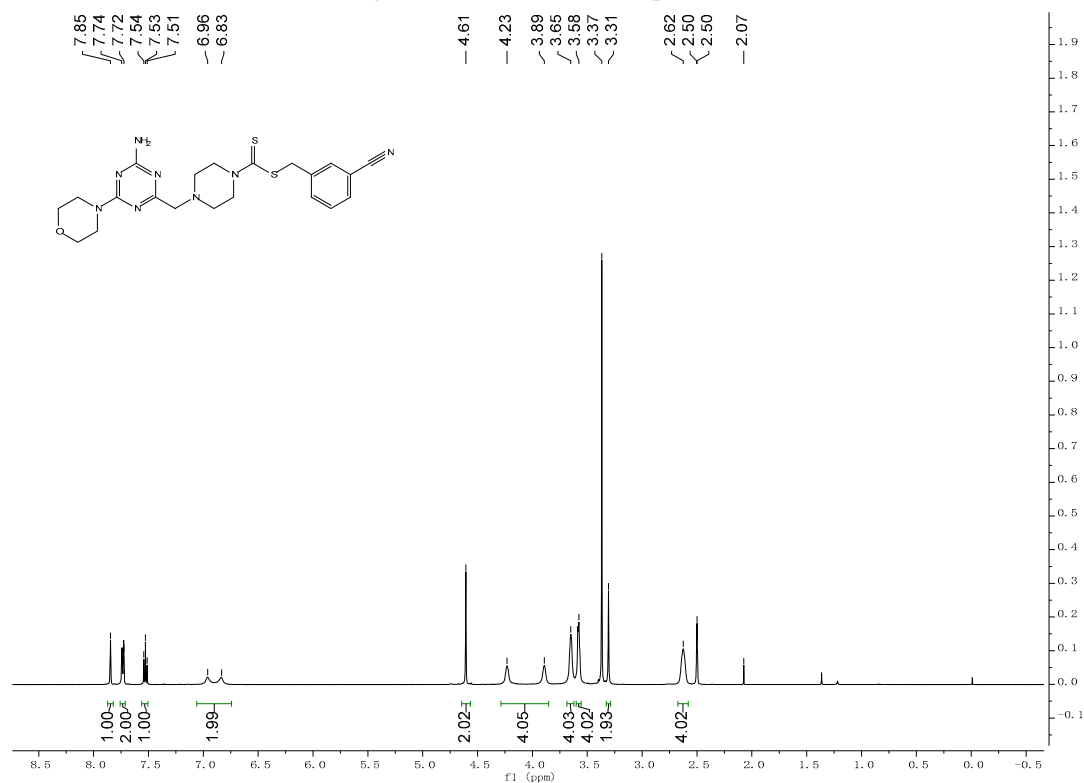

Figure S64. <sup>1</sup>H NMR (500 MHz, DMSO-d<sub>6</sub>) spectrum of compound C20.

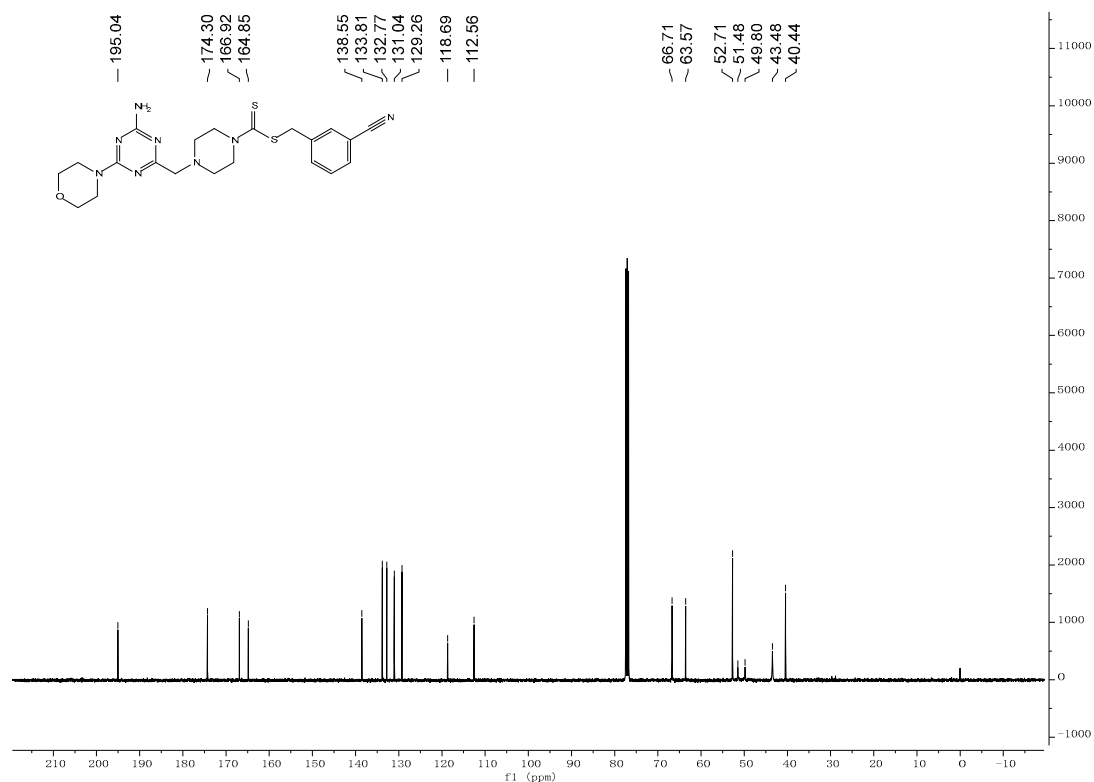

**Figure S65.** <sup>13</sup>C NMR (126 MHz, DMSO-*d*<sub>6</sub>) spectrum of compound C20.

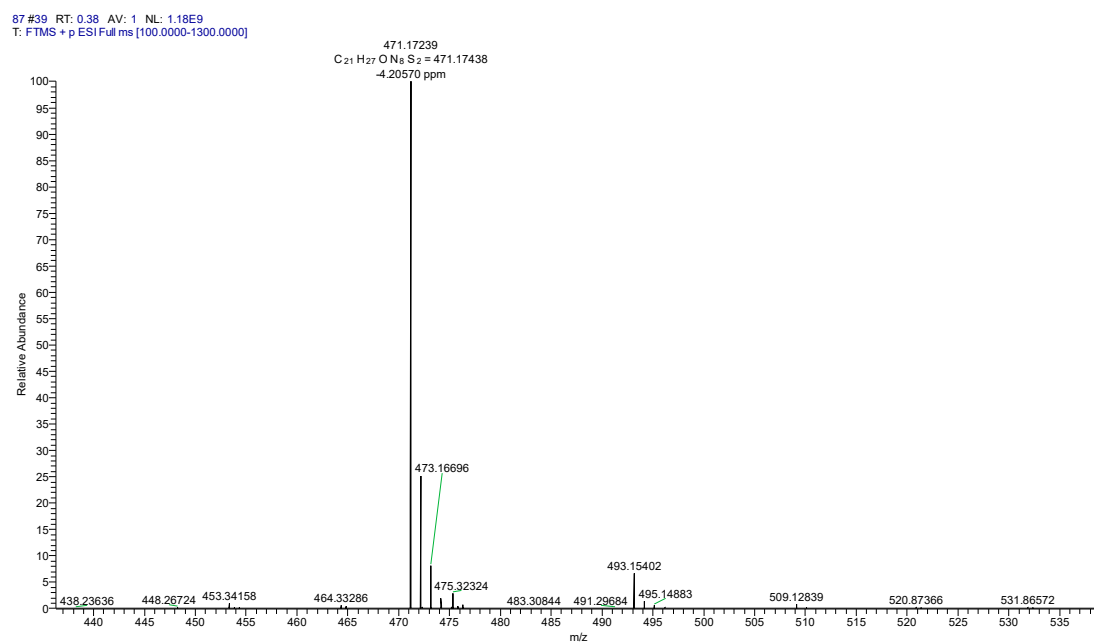

**Figure S66.** HRMS of compound C20.



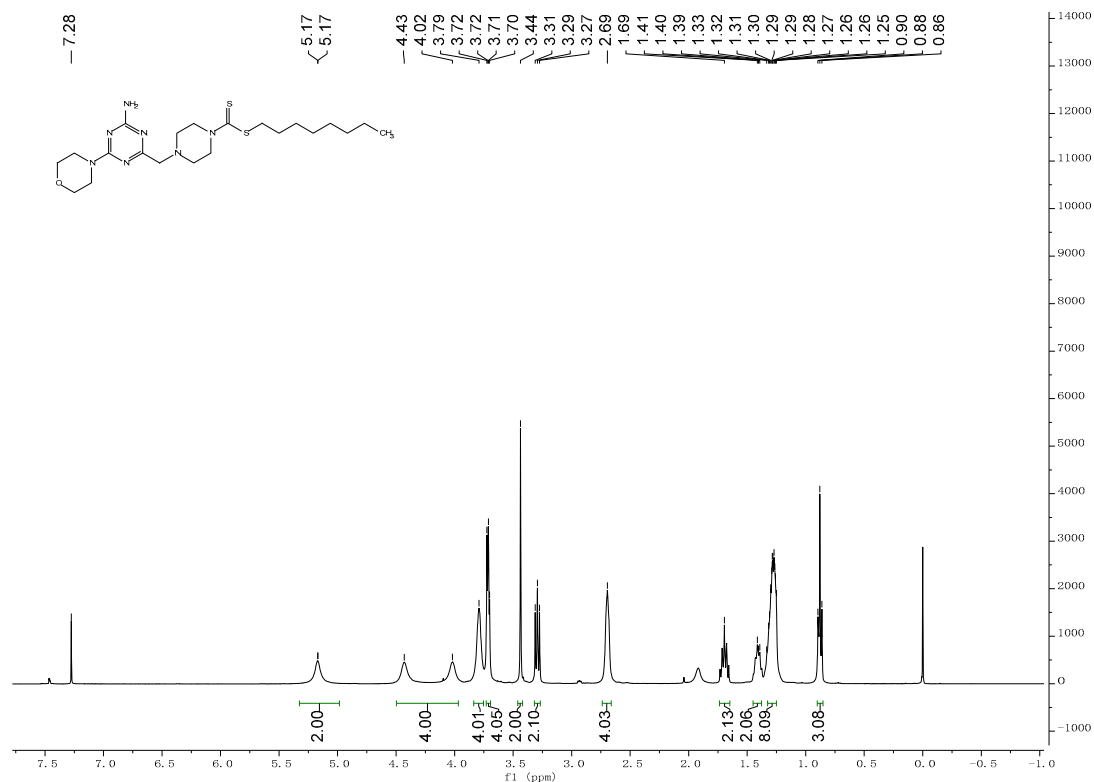

Figure S67. <sup>1</sup>H NMR (500 MHz, DMSO-*d*<sub>6</sub>) spectrum of compound C21.

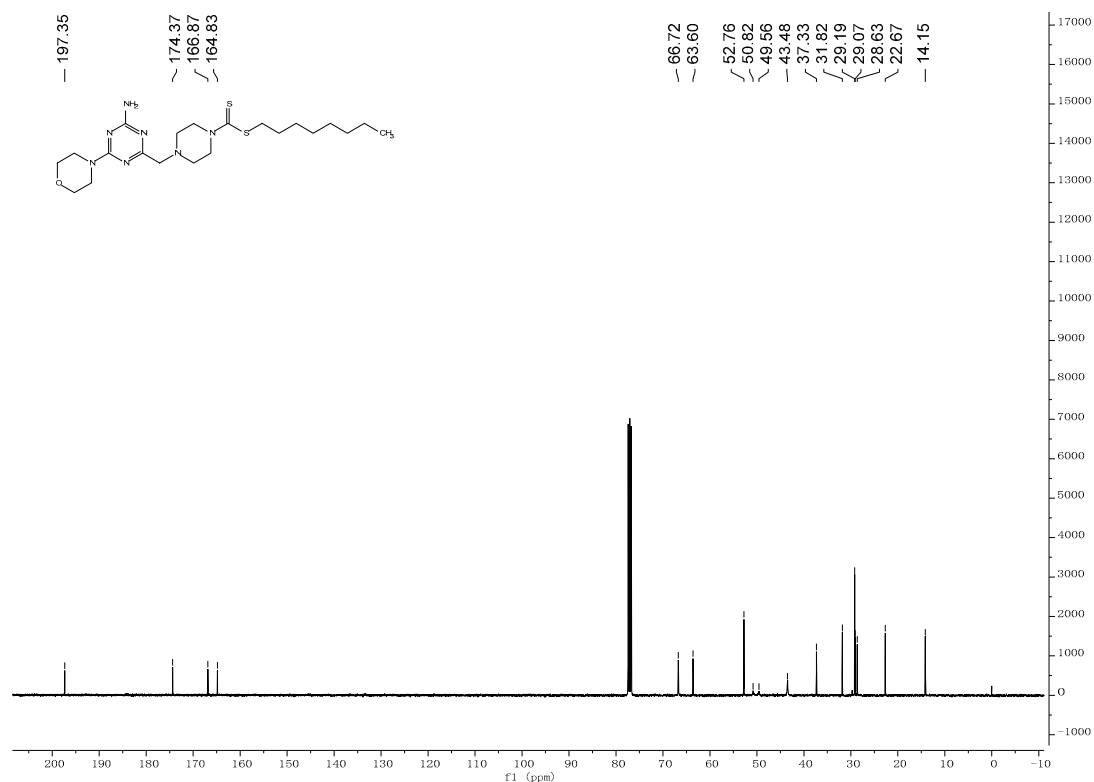

Figure S68. <sup>13</sup>C NMR (101 MHz, CDCl<sub>3</sub>) spectrum of compound C21.

88 #85 RT: 0.82 AV: 1 NL: 7.78E8  
T: FTMS + p ESI Full ms [100.0000-1300.0000]

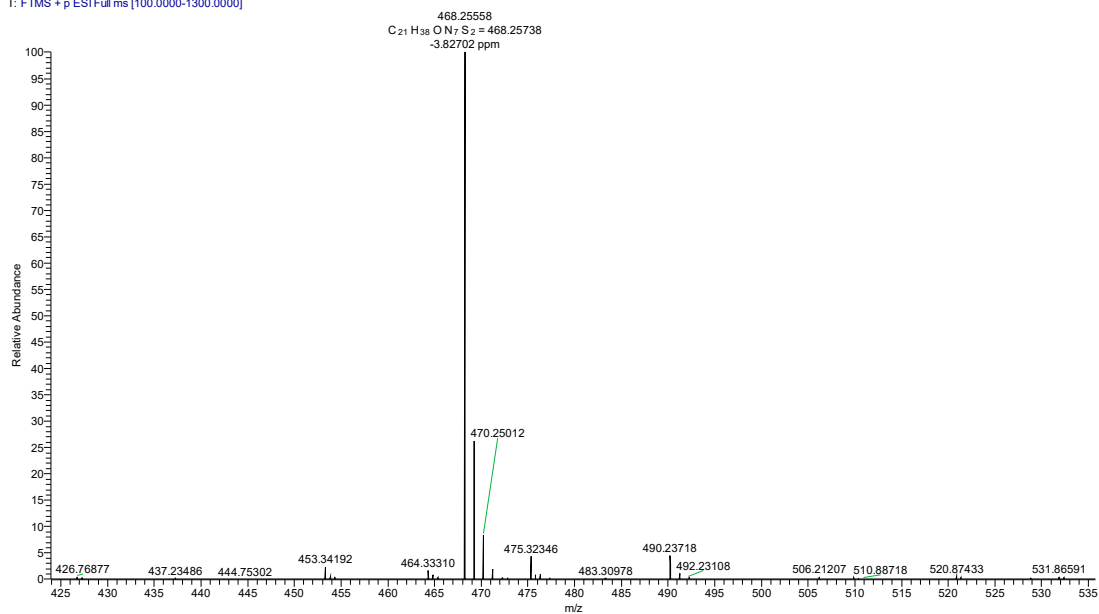

Figure S69. HRMS of compound C21.

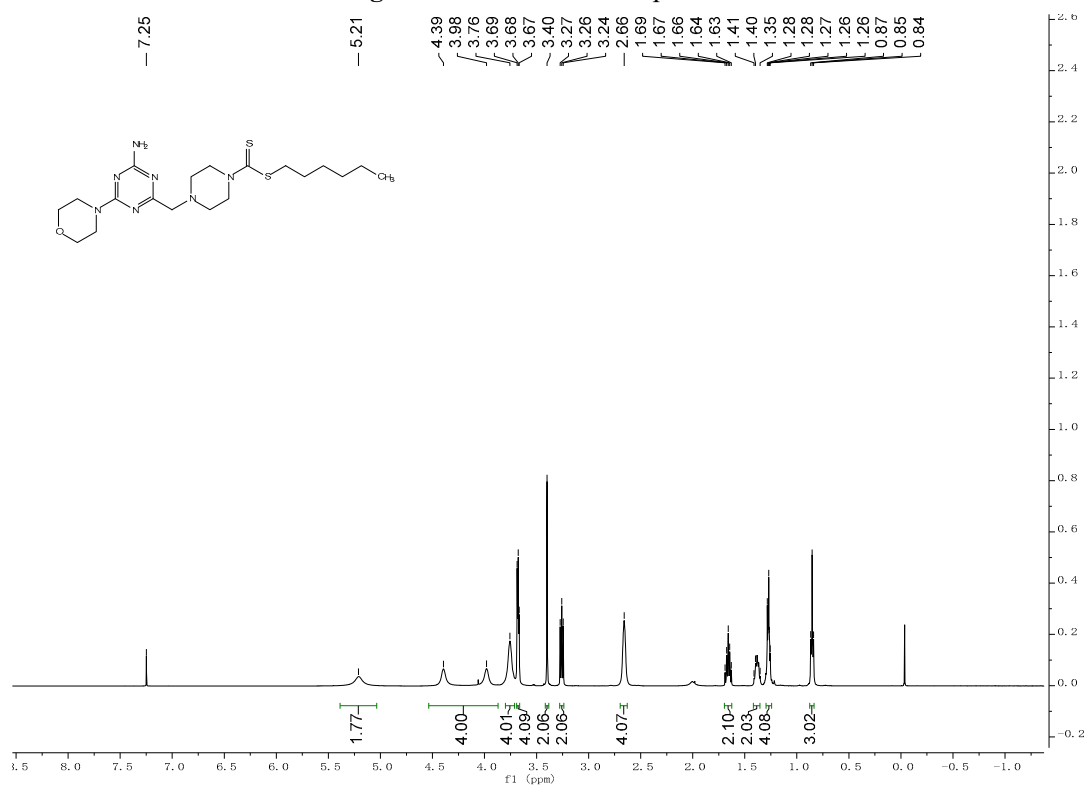

Figure S70. <sup>1</sup>H NMR (500 MHz, CDCl<sub>3</sub>) spectrum of compound C22.

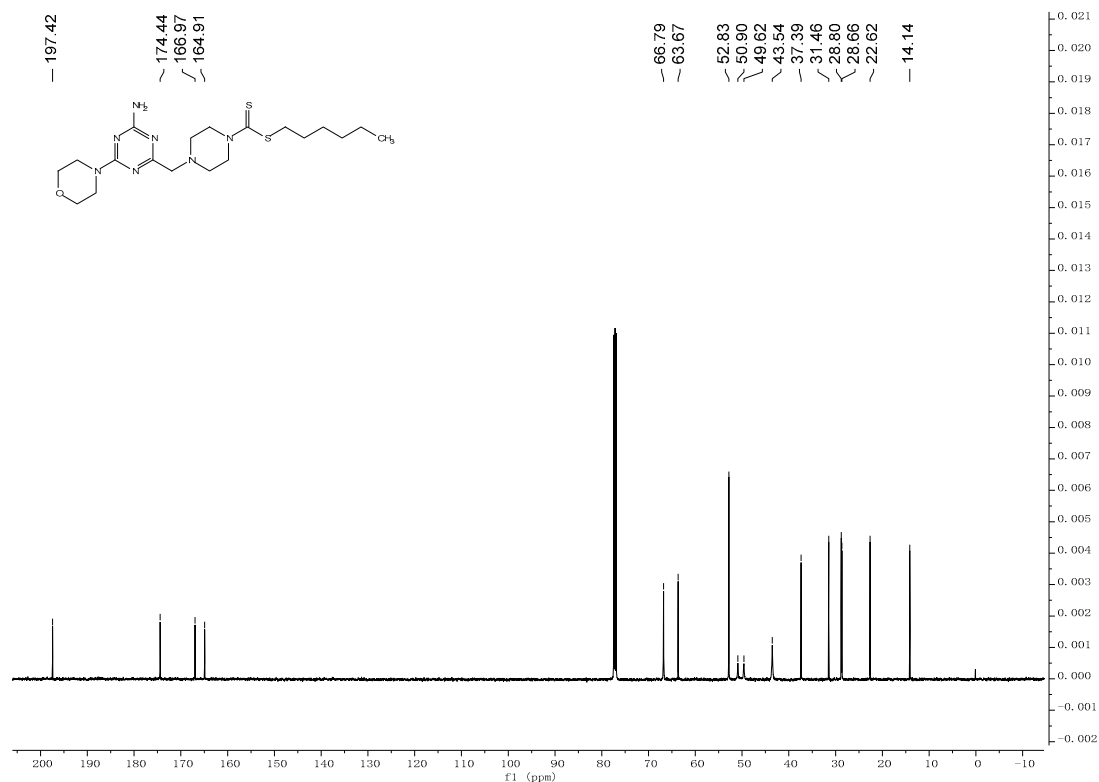

**Figure S71.** <sup>13</sup>C NMR (126MHz, CDCl<sub>3</sub>) spectrum of compound C22.

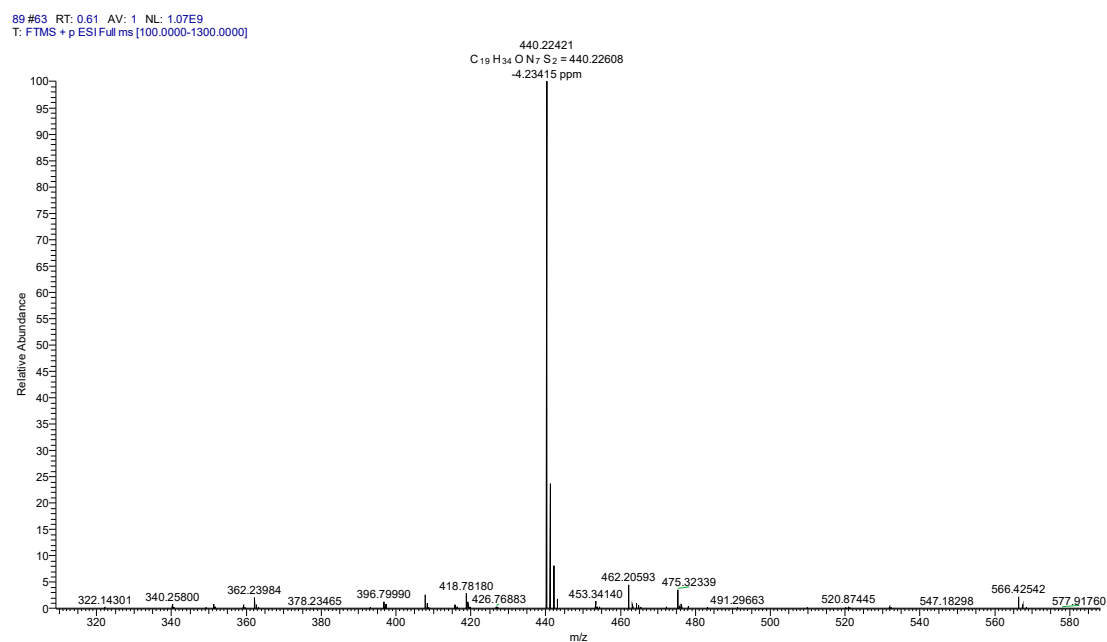

**Figure S72.** HRMS of compound C22.

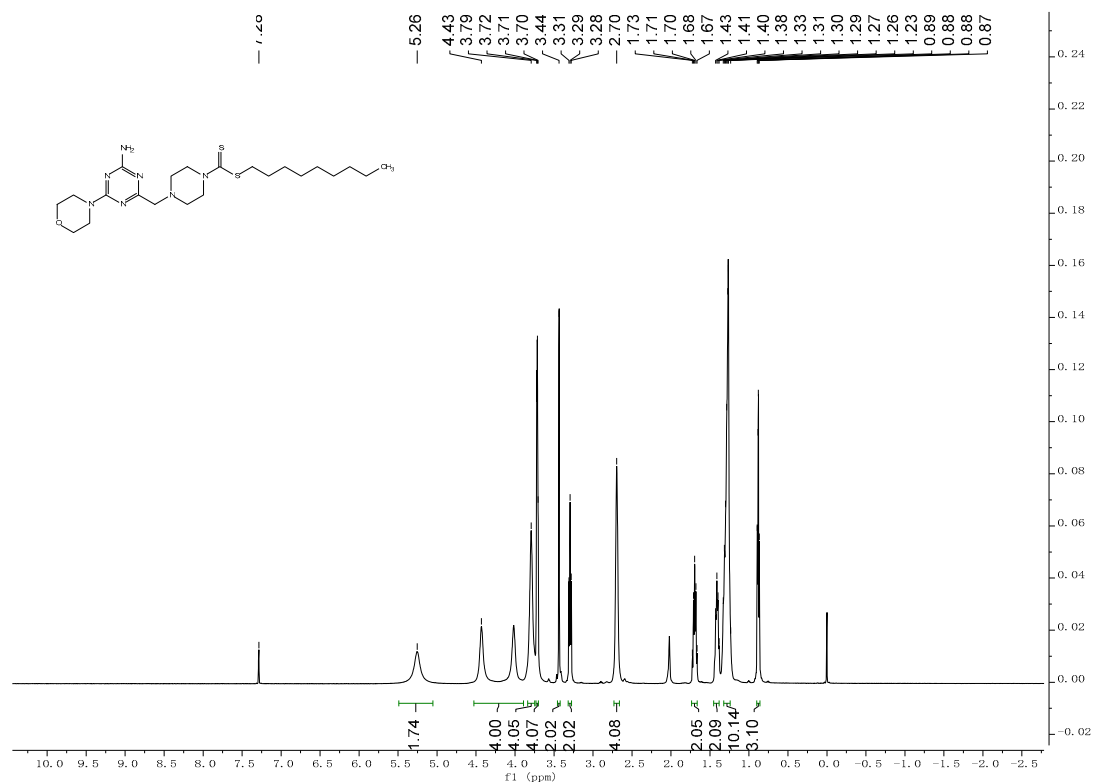

**Figure S73.** <sup>1</sup>H NMR (500 MHz, CDCl<sub>3</sub>) spectrum of compound C23.

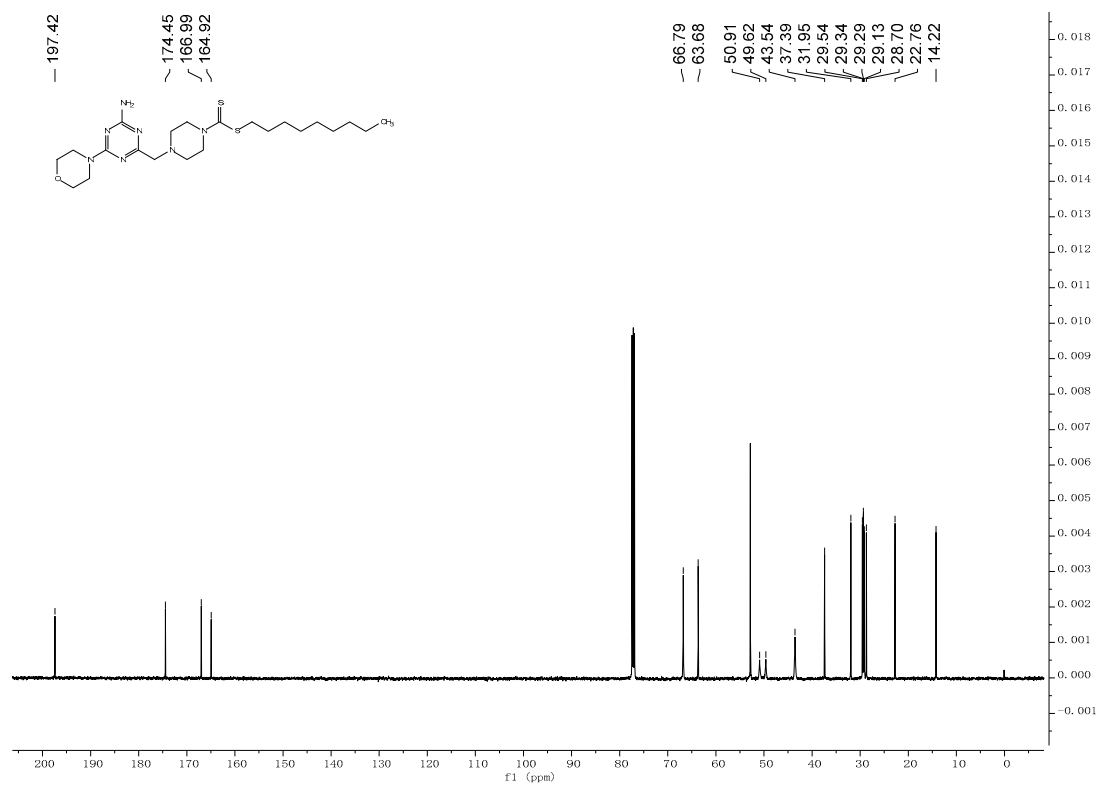

**Figure S74.** <sup>13</sup>C NMR (126 MHz, CDCl<sub>3</sub>) spectrum of compound C23.

90 #109 RT: 1.05 AV: 1 NL: 5.39E8  
T: FTMS + p ESI Full ms [100.0000-1300.0000]

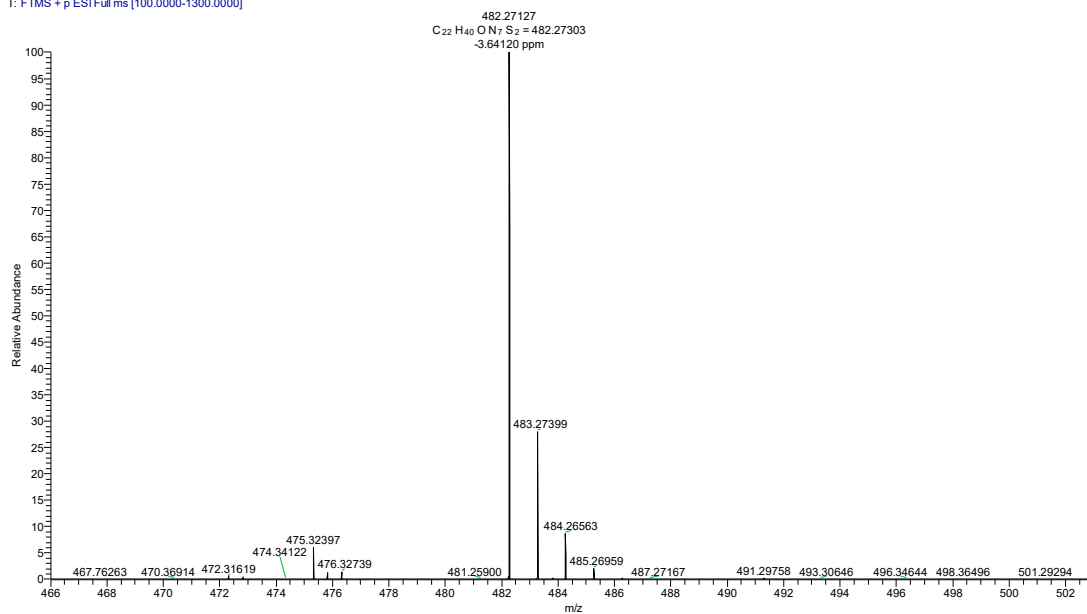

Figure S75. HRMS of compound C23.

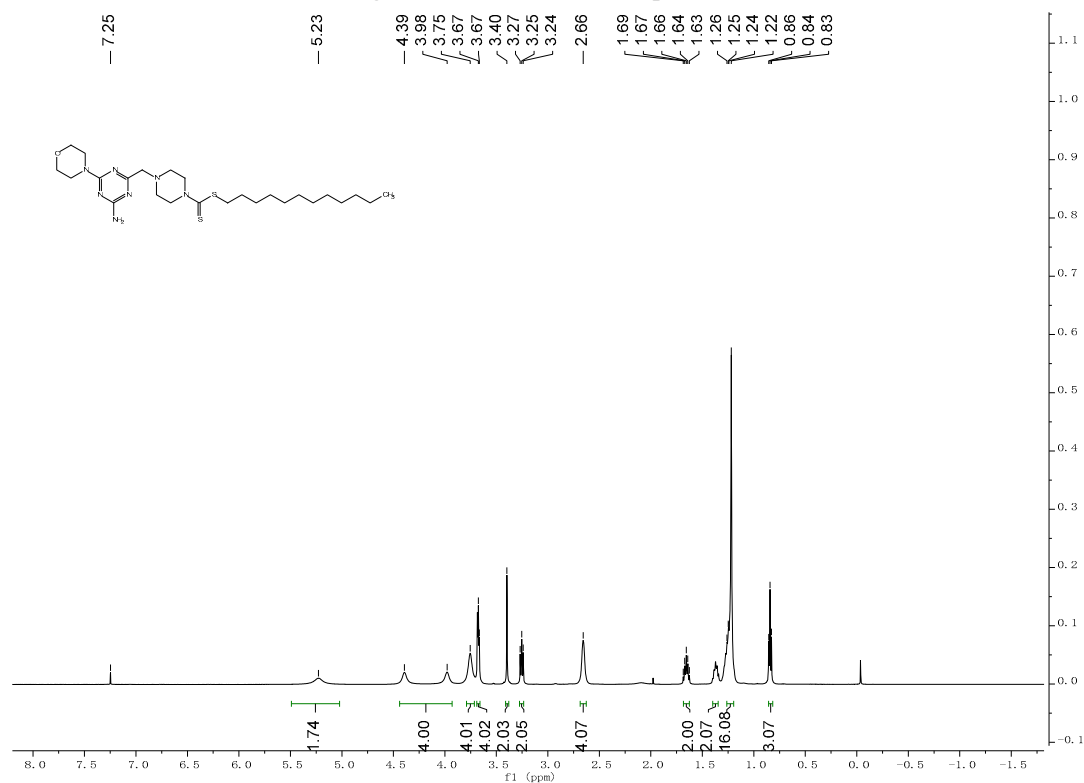

Figure S76. <sup>1</sup>H NMR (500 MHz, CDCl<sub>3</sub>) spectrum of compound C24.

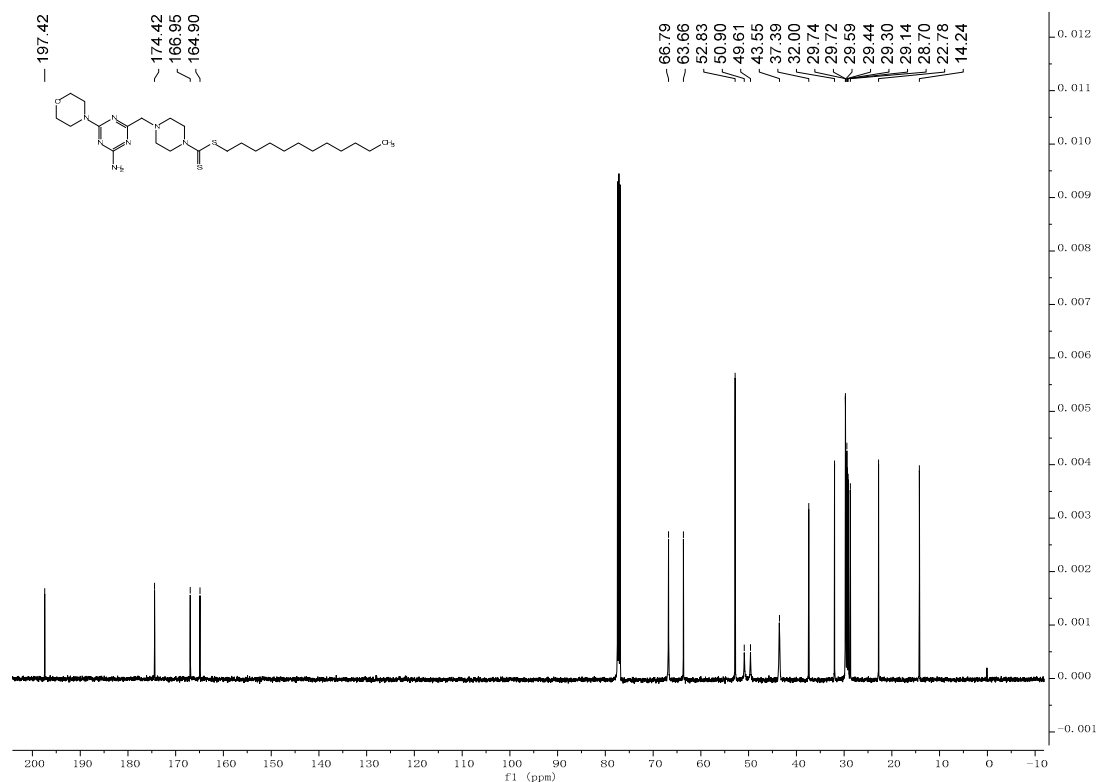

**Figure S77.** <sup>13</sup>C NMR (126 MHz, CDCl<sub>3</sub>) spectrum of compound C24.

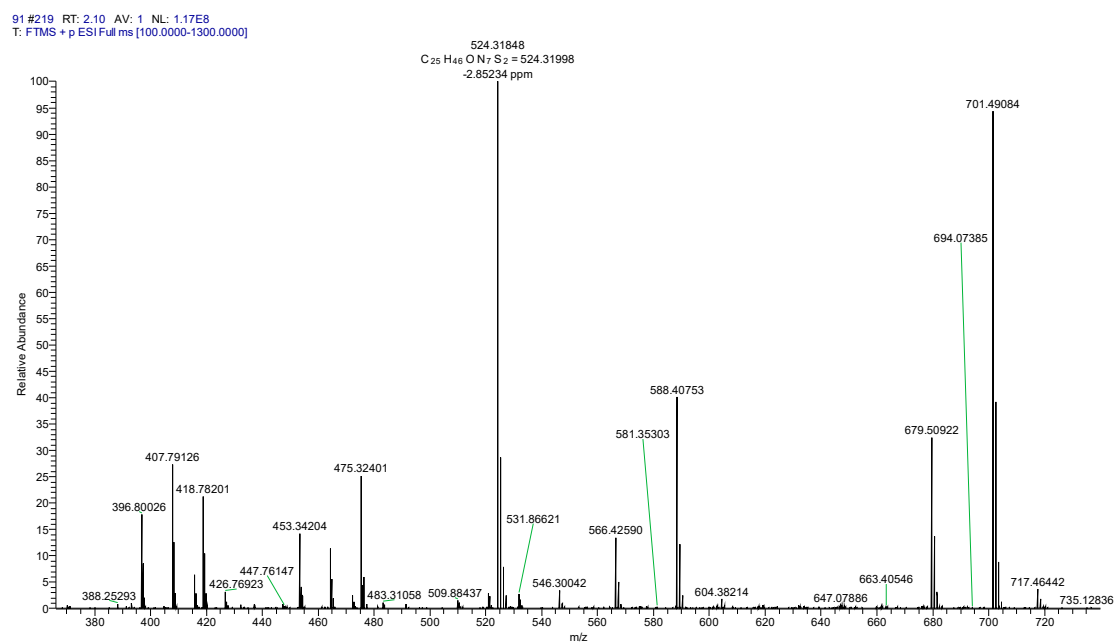

**Figure S78.** HRMS of compound C24.

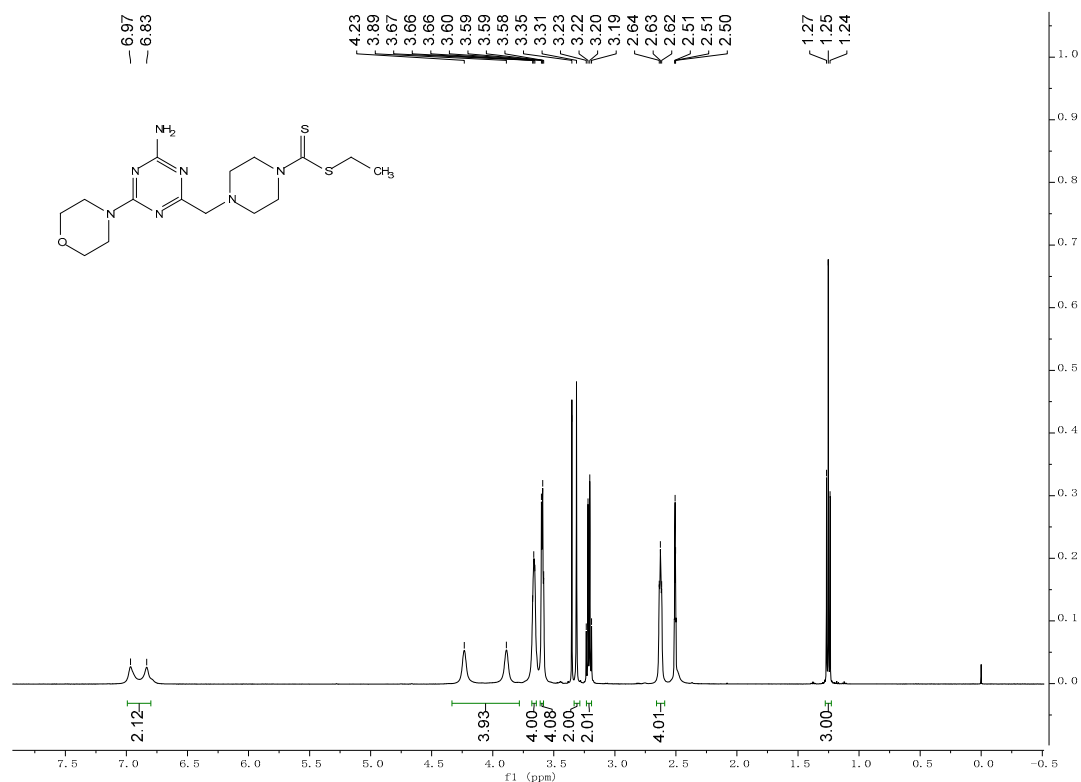

**Figure S79.** <sup>1</sup>H NMR (500 MHz, DMSO-*d*<sub>6</sub>) spectrum of compound C25.

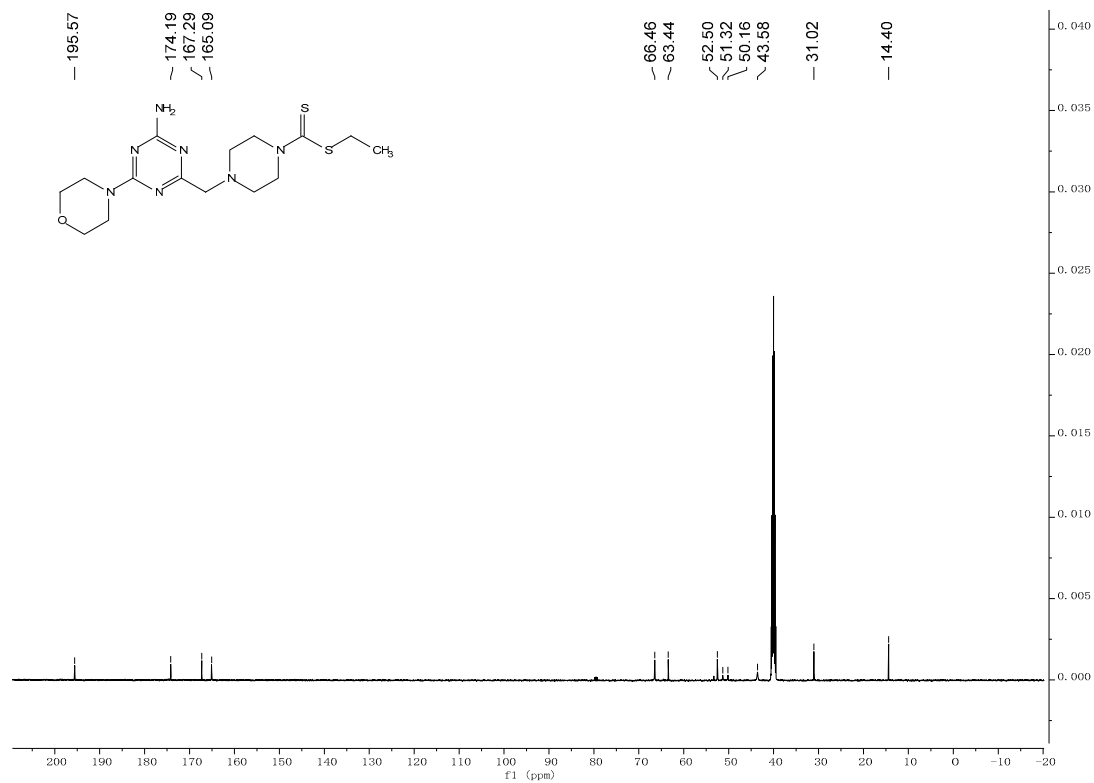

**Figure S80.** <sup>13</sup>C NMR (126 MHz, DMSO-*d*<sub>6</sub>) spectrum of compound C25.

92 #37 RT: 0.36 AV: 1 NL: 1.99E9  
T: FTMS + p ESI Full ms [100.0000-1300.0000]

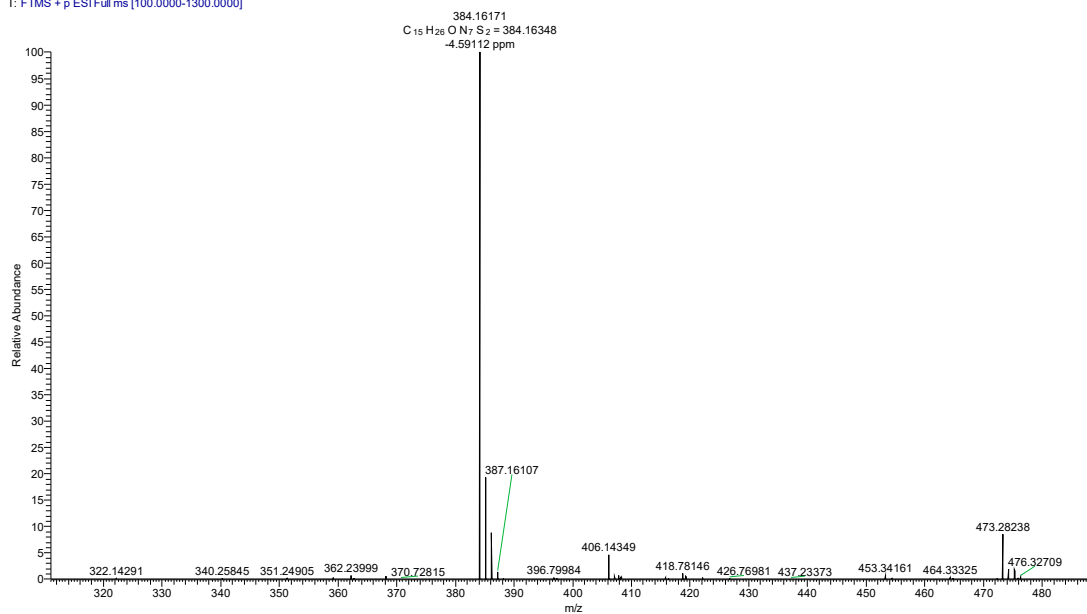

Figure S81. HRMS of compound C25.

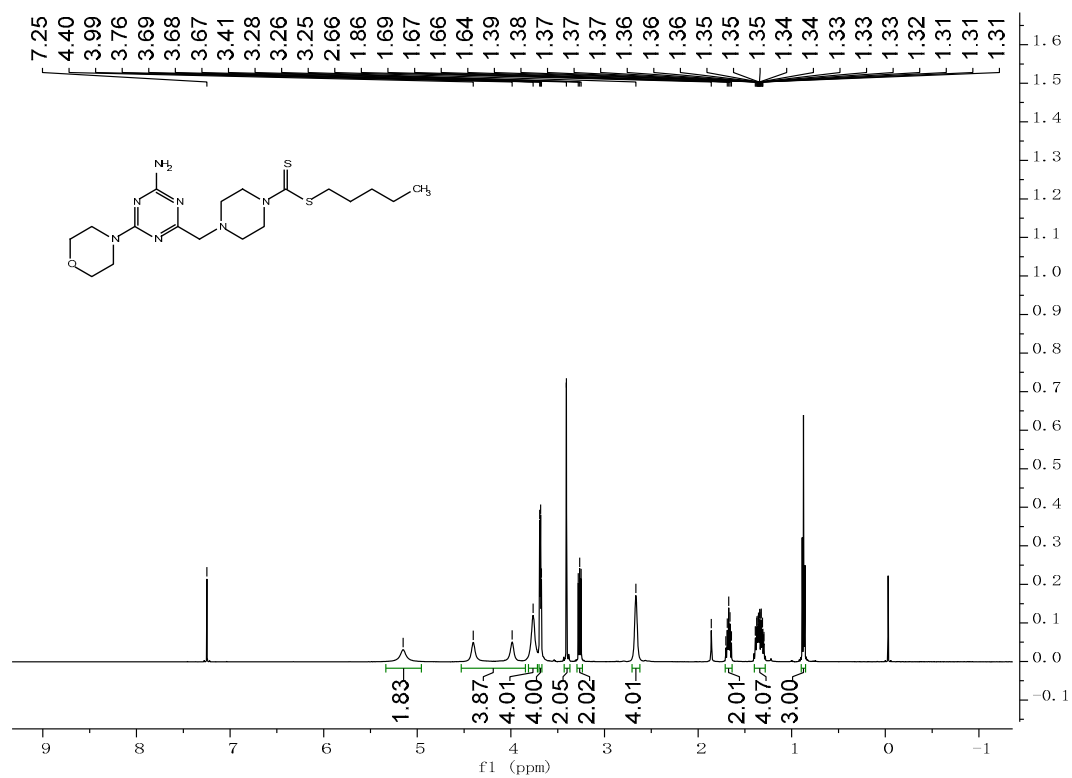

Figure S82. <sup>1</sup>H NMR (500 MHz, CDCl<sub>3</sub>) spectrum of compound C26.



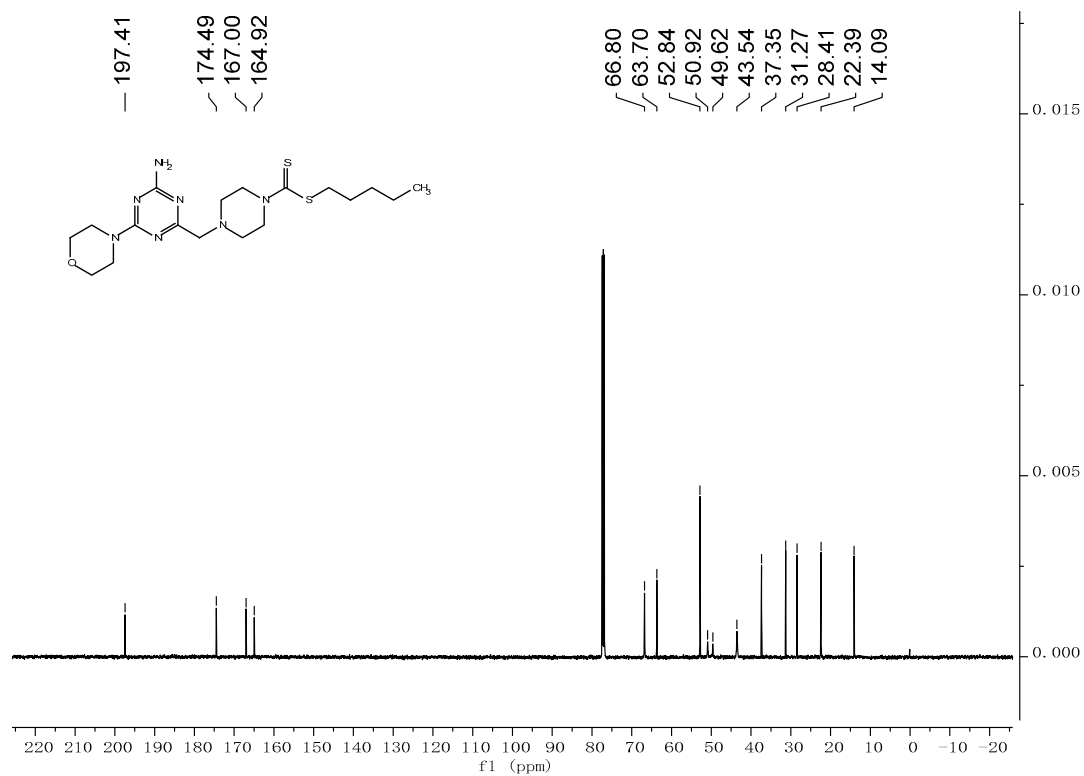

**Figure S83.** <sup>13</sup>C NMR (126 MHz, CDCl<sub>3</sub>) spectrum of compound C26.

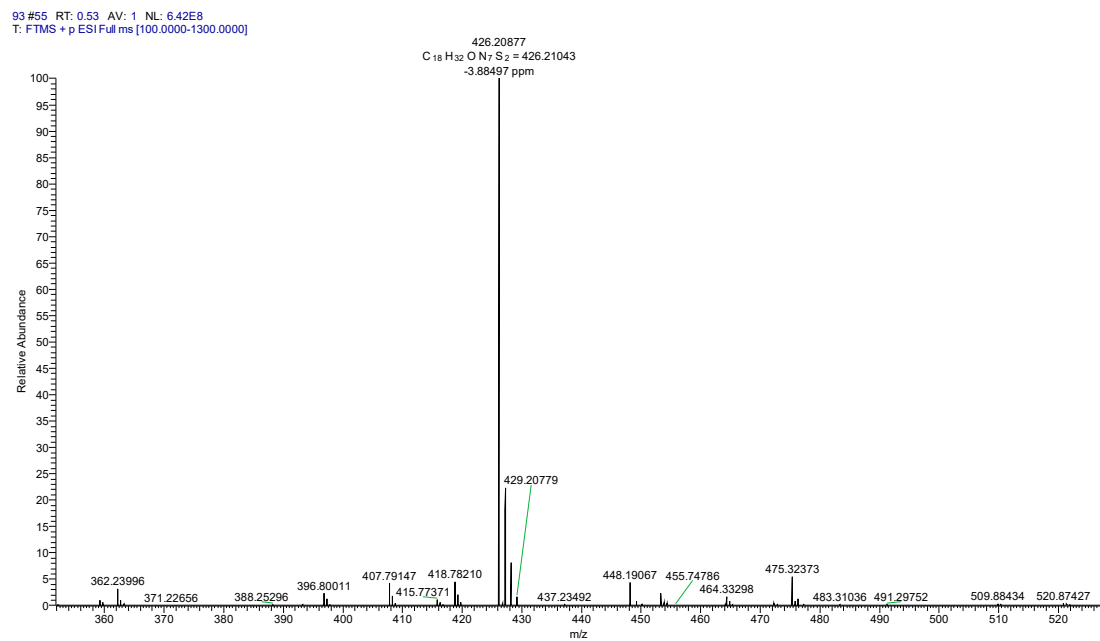

**Figure S84.** HRMS of compound C26.

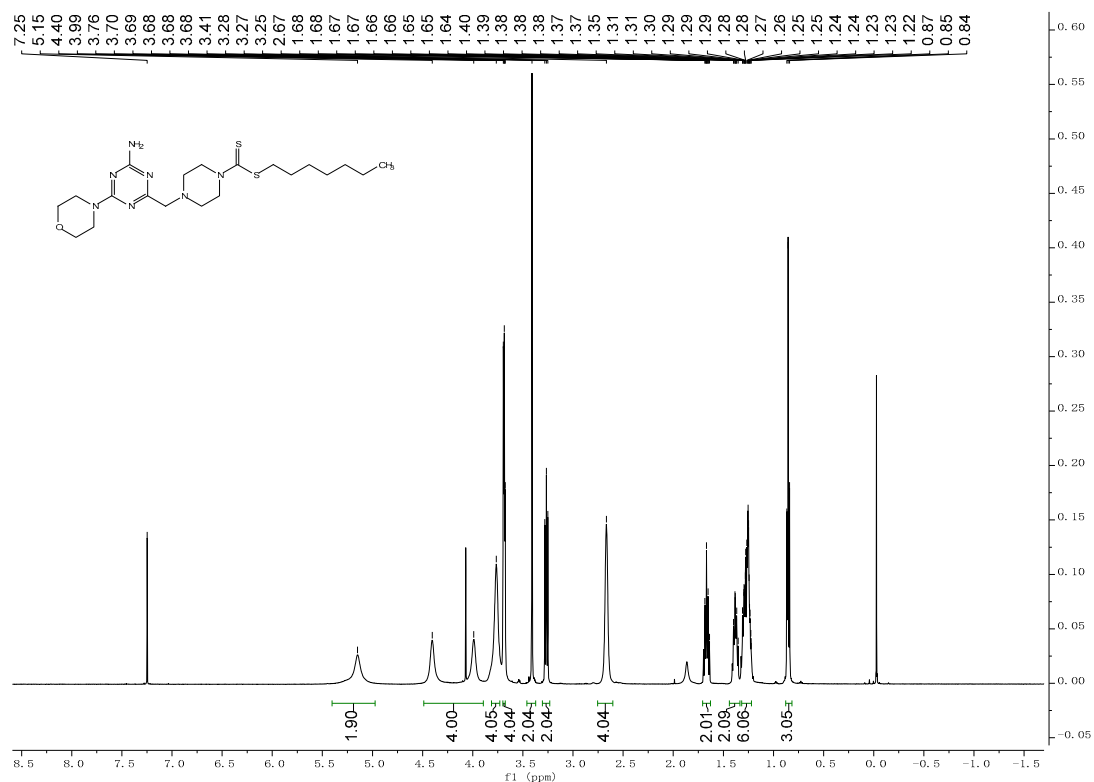

Figure S85. <sup>1</sup>H NMR (500 MHz, CDCl<sub>3</sub>) spectrum of compound C27.

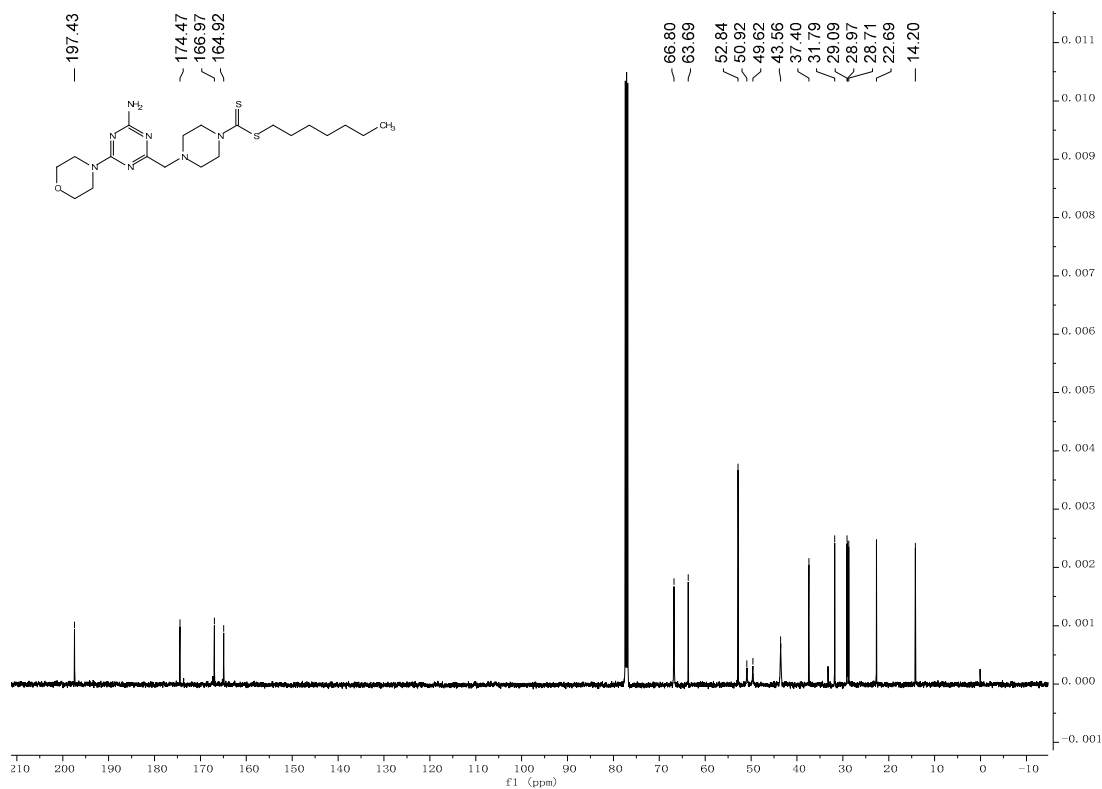

Figure S86. <sup>13</sup>C NMR (126 MHz, CDCl<sub>3</sub>) spectrum of compound C27.

94 #71 RT: 0.68 AV: 1 NL: 1.21E9  
T: FTMS + p ESI Full ms [100.0000-1300.0000]

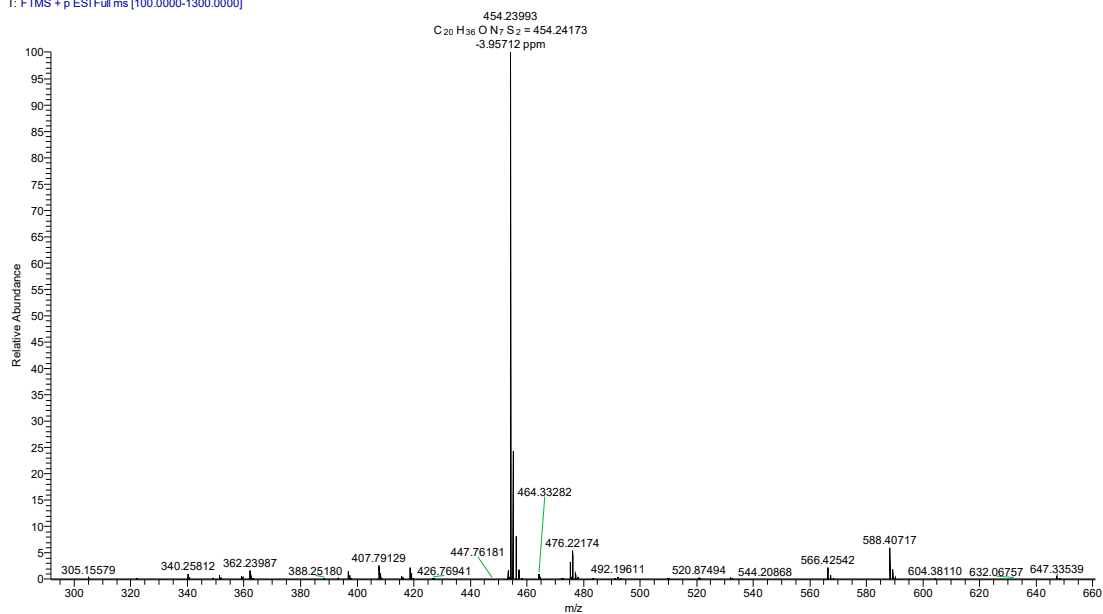

Figure S87. HRMS of compound C27.

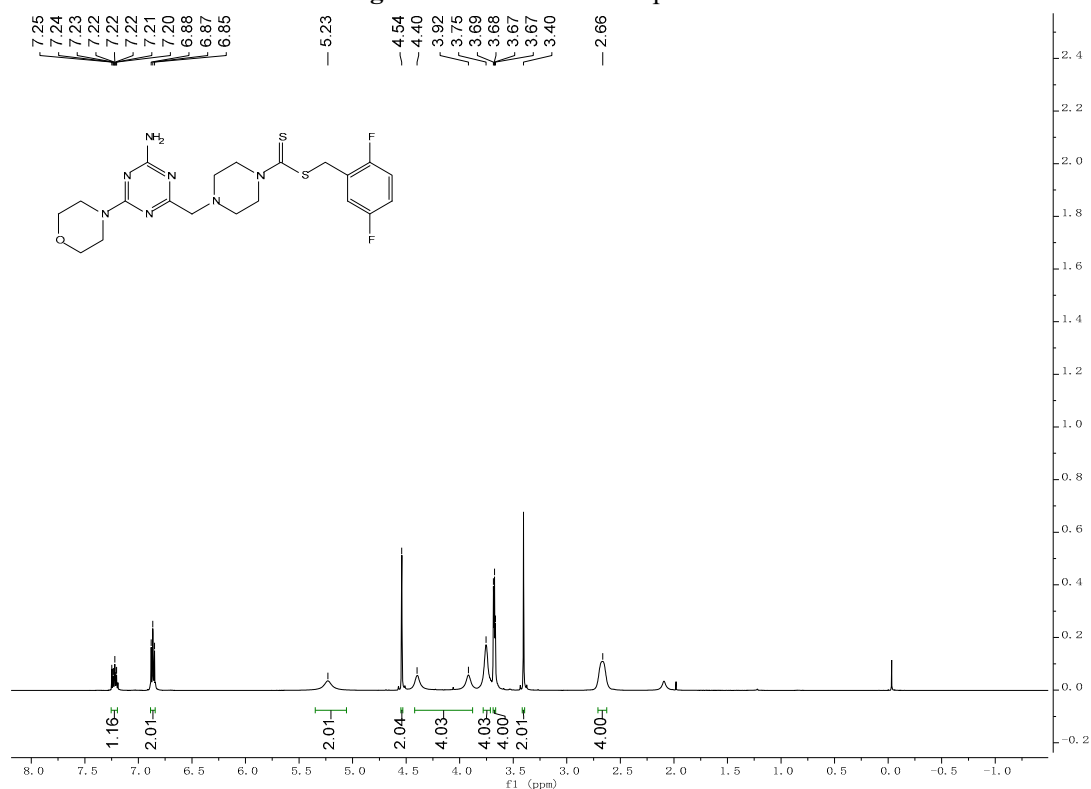

Figure S88. <sup>1</sup>H NMR (500 MHz, CDCl<sub>3</sub>) spectrum of compound C28.

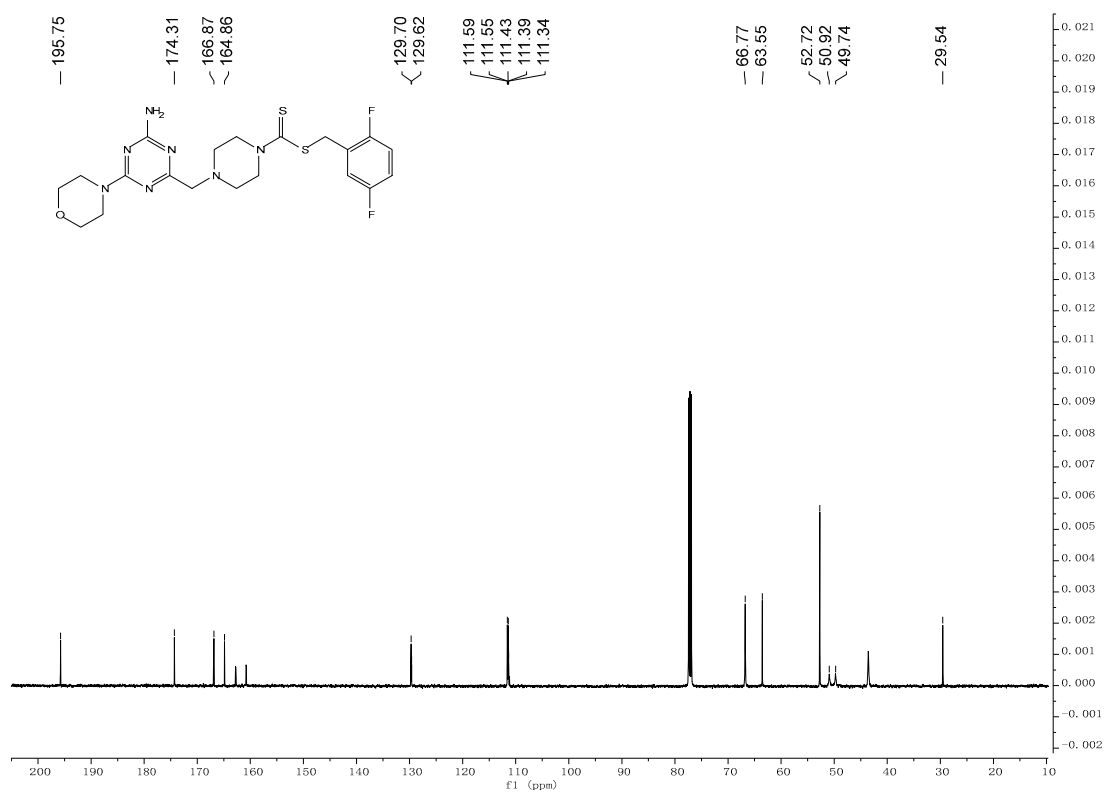

**Figure S89.** <sup>13</sup>C NMR (126 MHz, CDCl<sub>3</sub>) spectrum of compound C28.

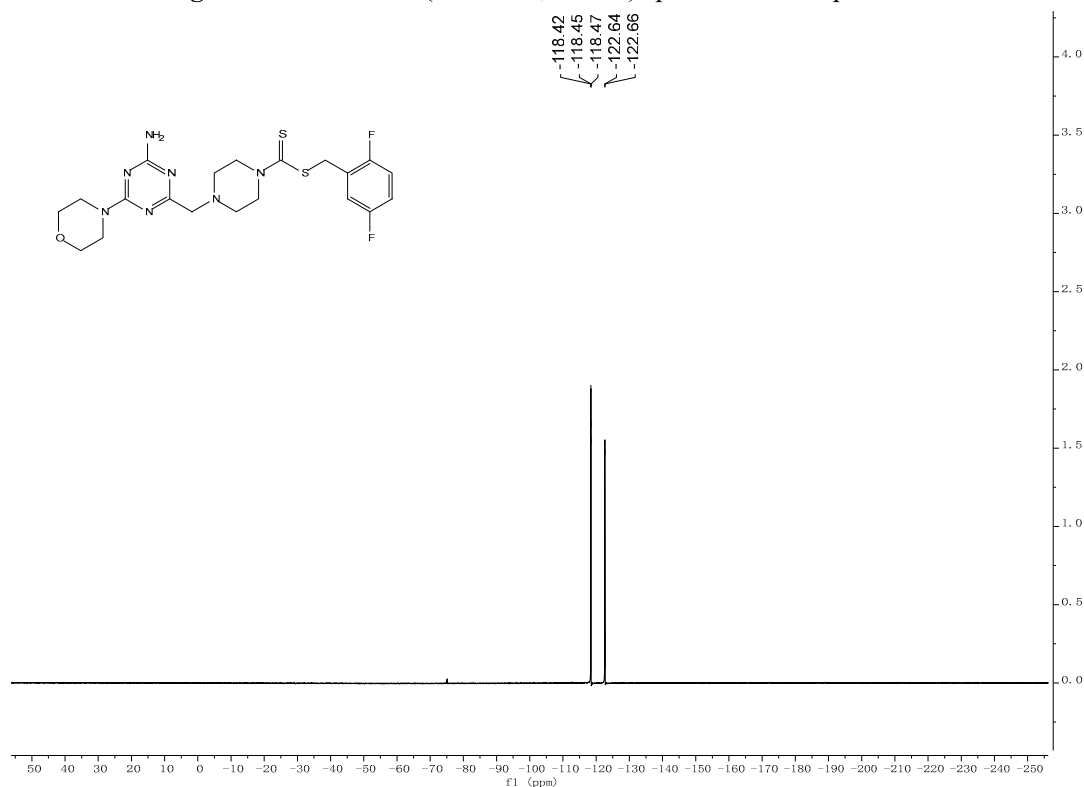

**Figure S90.** <sup>19</sup>F NMR (471 MHz, CDCl<sub>3</sub>) spectrum of compound C28.

95 #43 RT: 0.42 AV: 1 NL: 7.70E8  
T: FTMS + p ESI Full ms [100.0000-1300.0000]

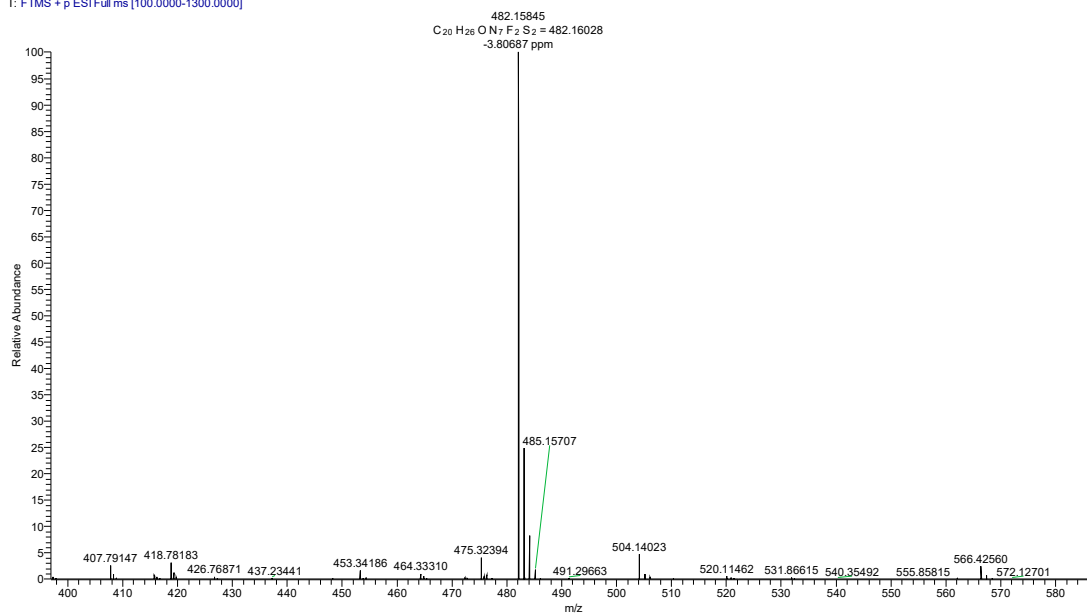

Figure S91. HRMS of compound C28.

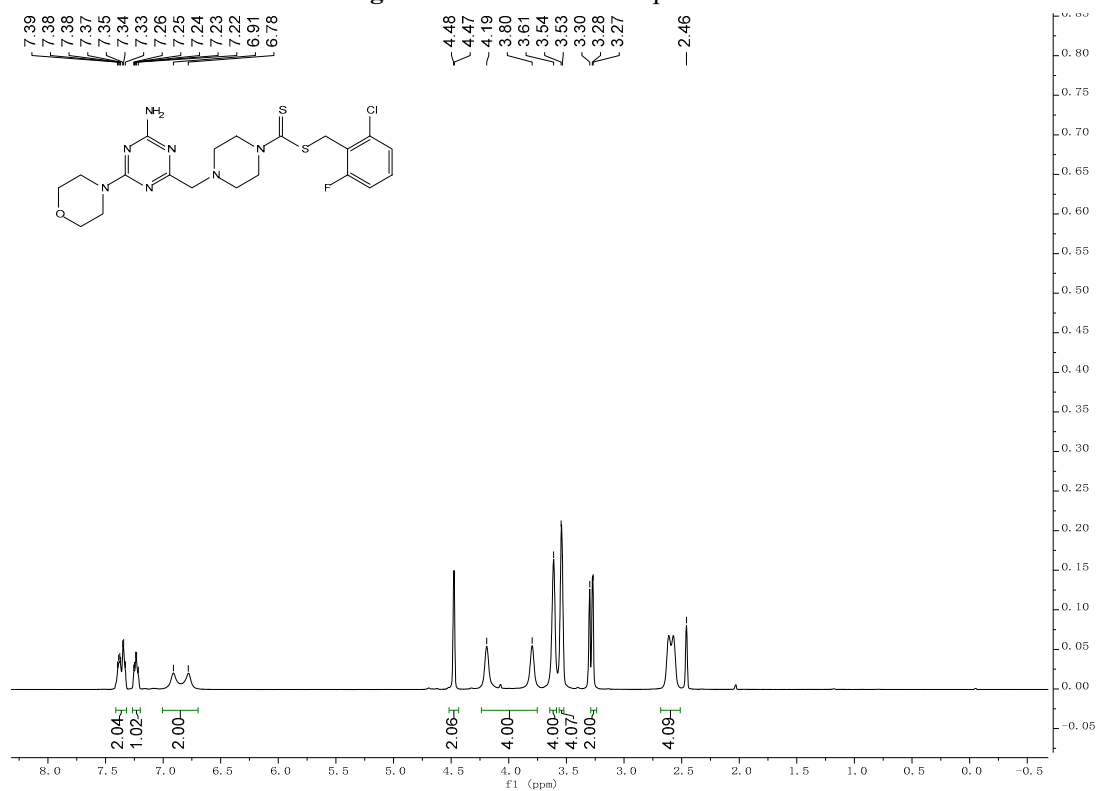

Figure S92. <sup>1</sup>H NMR (500 MHz, DMSO-d<sub>6</sub>) spectrum of compound C29.

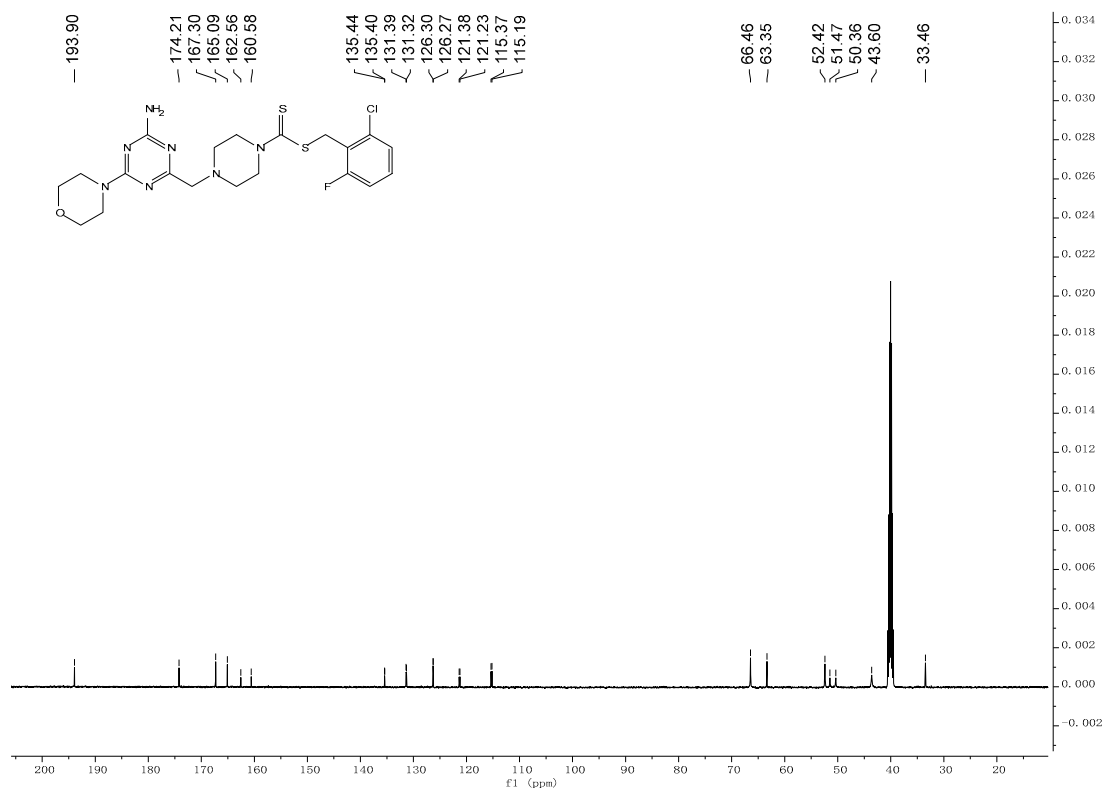

**Figure S93.** <sup>13</sup>C NMR (126 MHz, DMSO-*d*<sub>6</sub>) spectrum of compound C29.

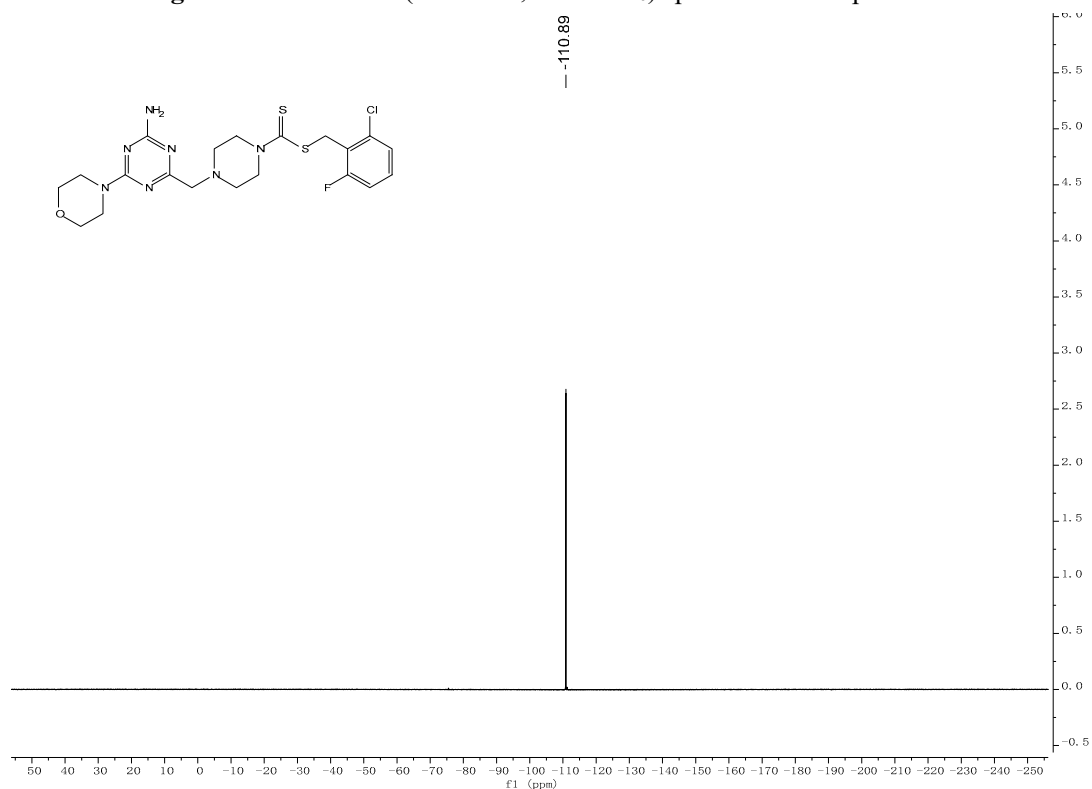

**Figure S94.** <sup>19</sup>F NMR (500 MHz, CDCl<sub>3</sub>) spectrum of compound C29.

96 #47 RT: 0.45 AV: 1 NL: 6.70E8  
T: FTMS + p ESI Full ms [100.0000-1300.0000]

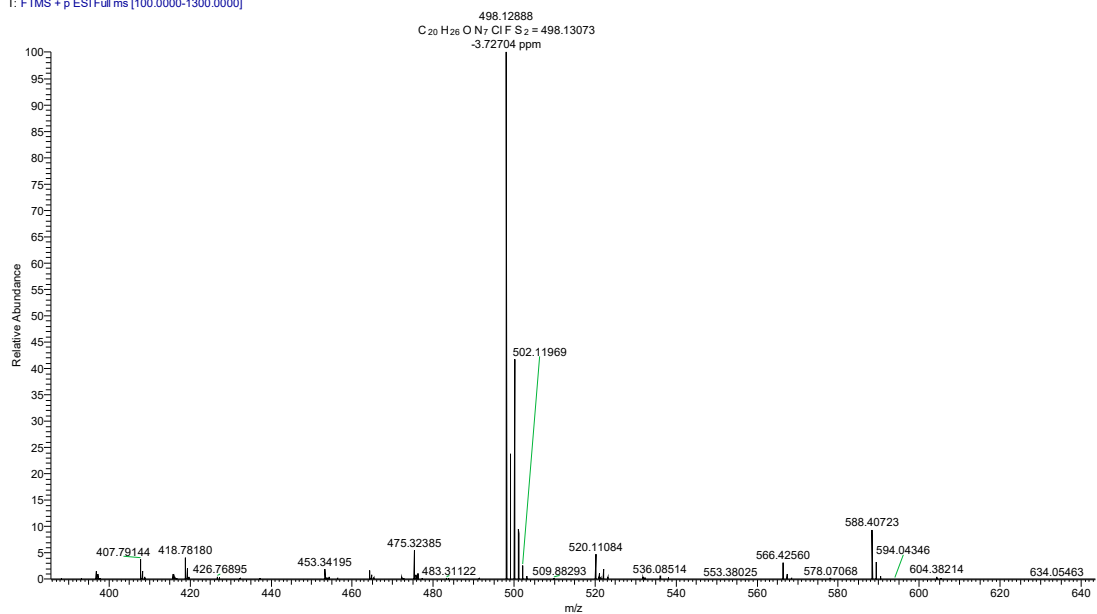

Figure S95. HRMS of compound C29.

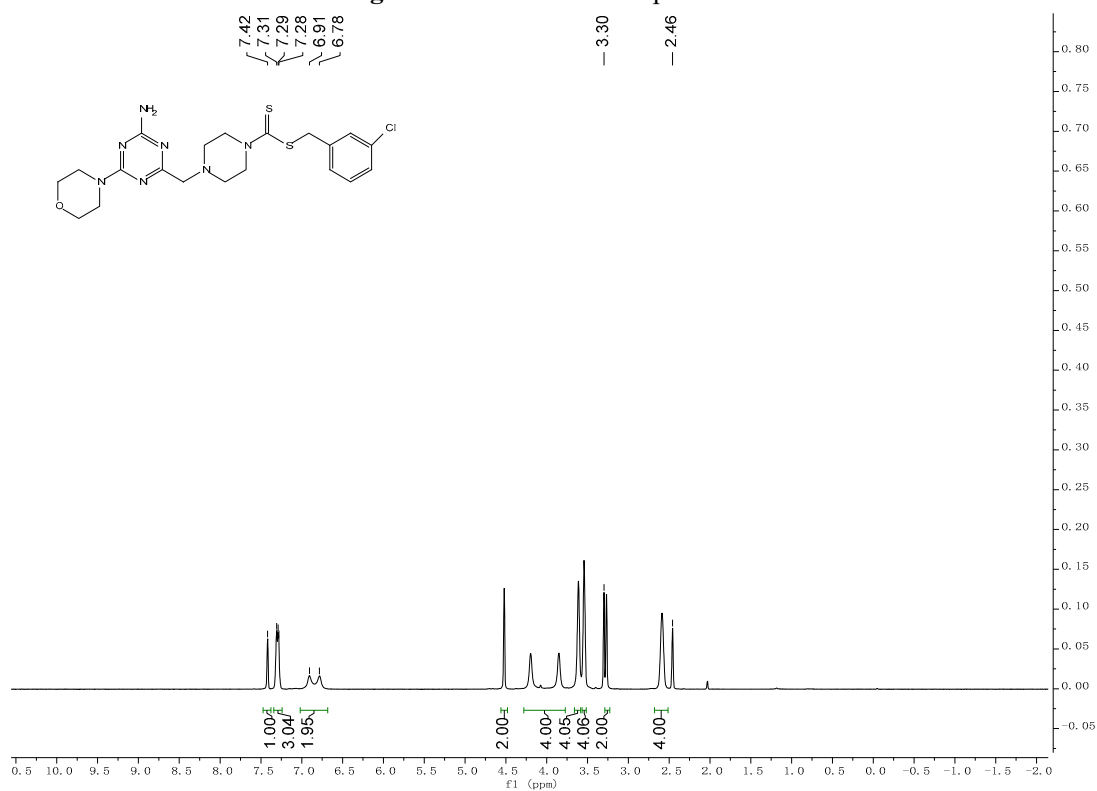

Figure S96. <sup>1</sup>H NMR (500 MHz, DMSO-d<sub>6</sub>) spectrum of compound C30.

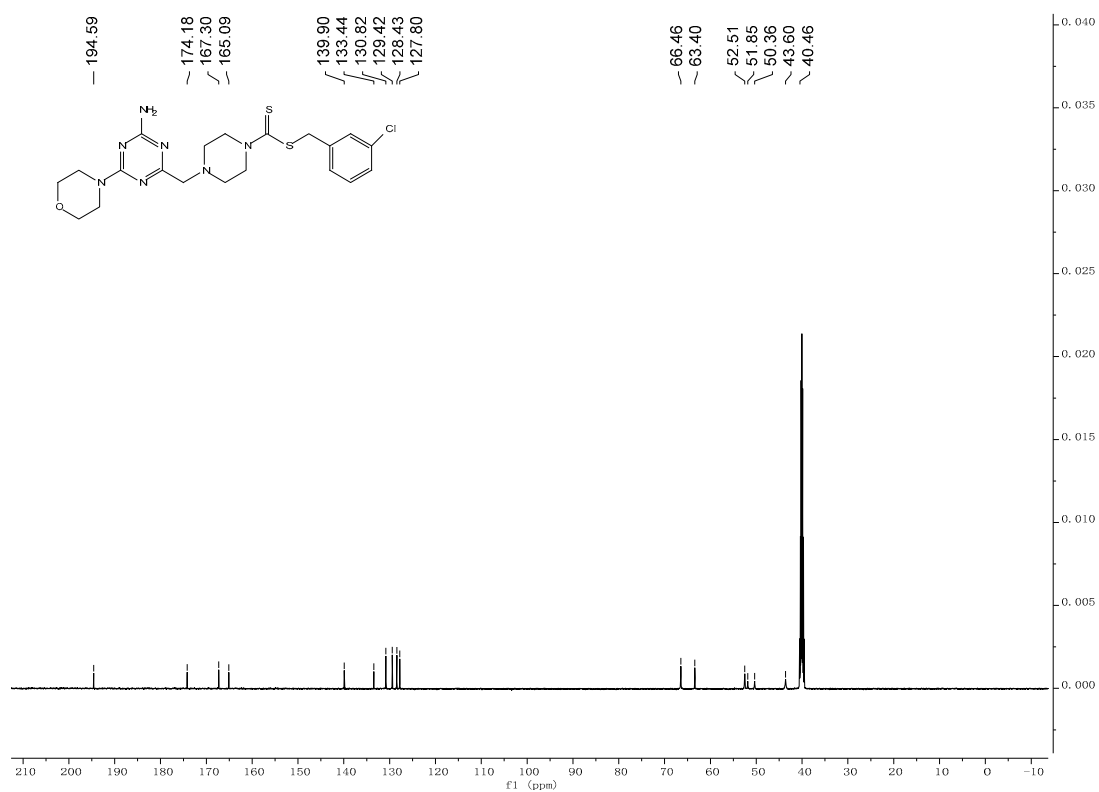

**Figure S97.** <sup>13</sup>C NMR (126 MHz, DMSO-*d*<sub>6</sub>) spectrum of compound C30.

97 #49 RT: 0.47 AV: 1 NL: 6.49E8  
T: FTMS + p ESI Full ms [100.0000-1300.0000]

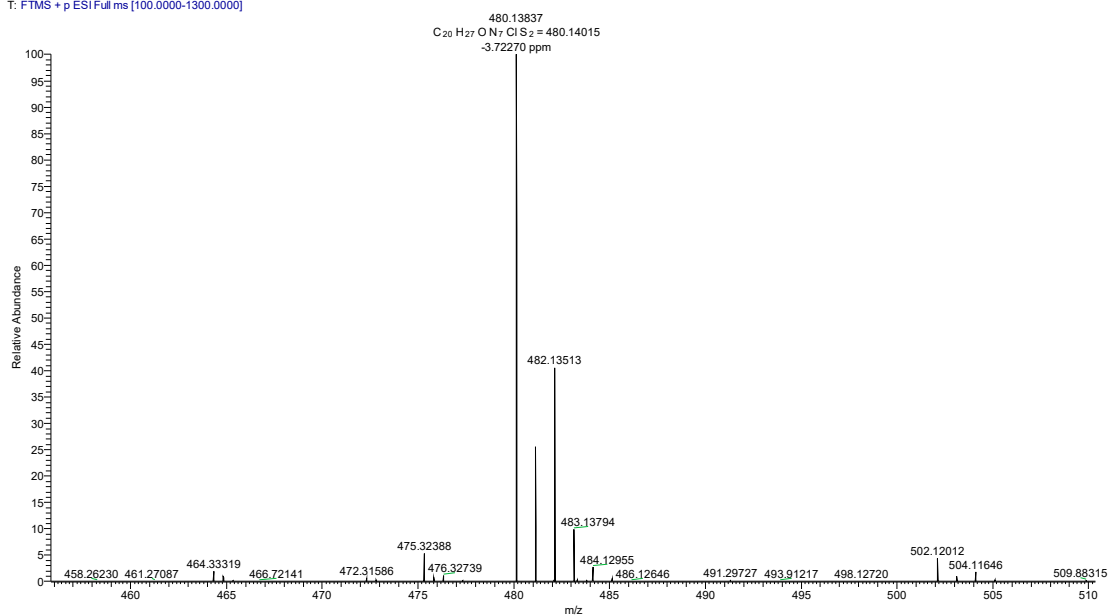

**Figure S98.** HRMS of compound C30.



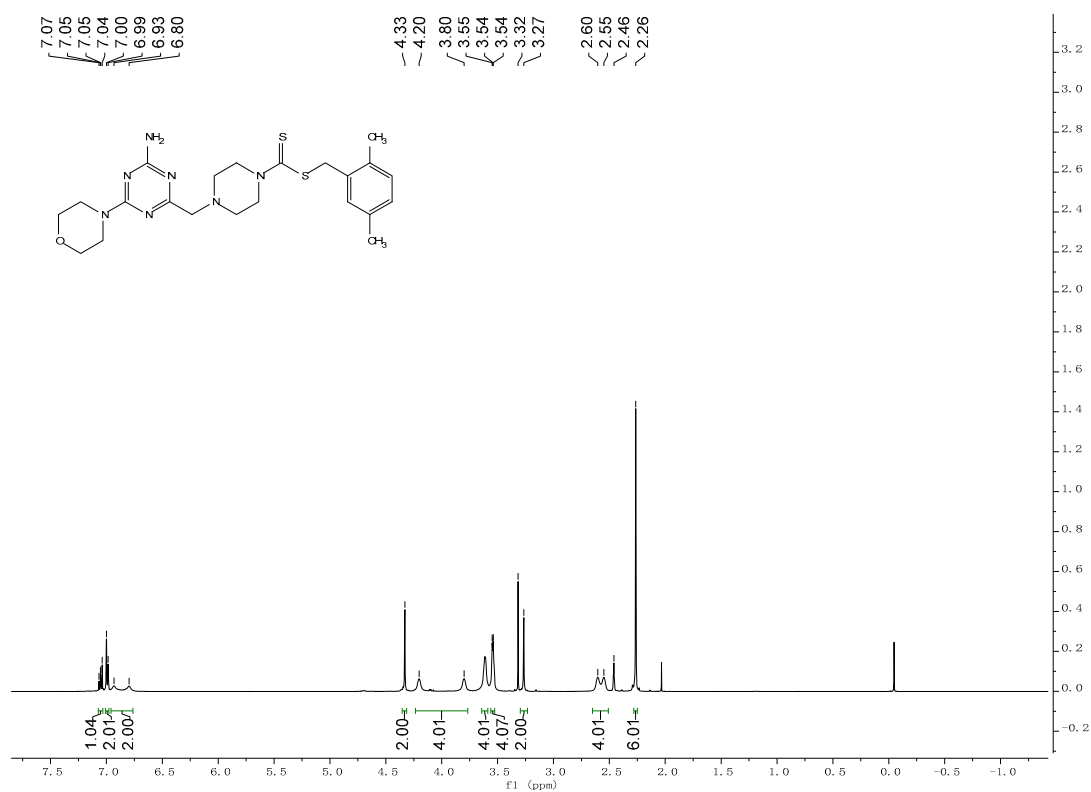

**Figure S99.** <sup>1</sup>H NMR (500 MHz, DMSO-*d*<sub>6</sub>) spectrum of compound C31.

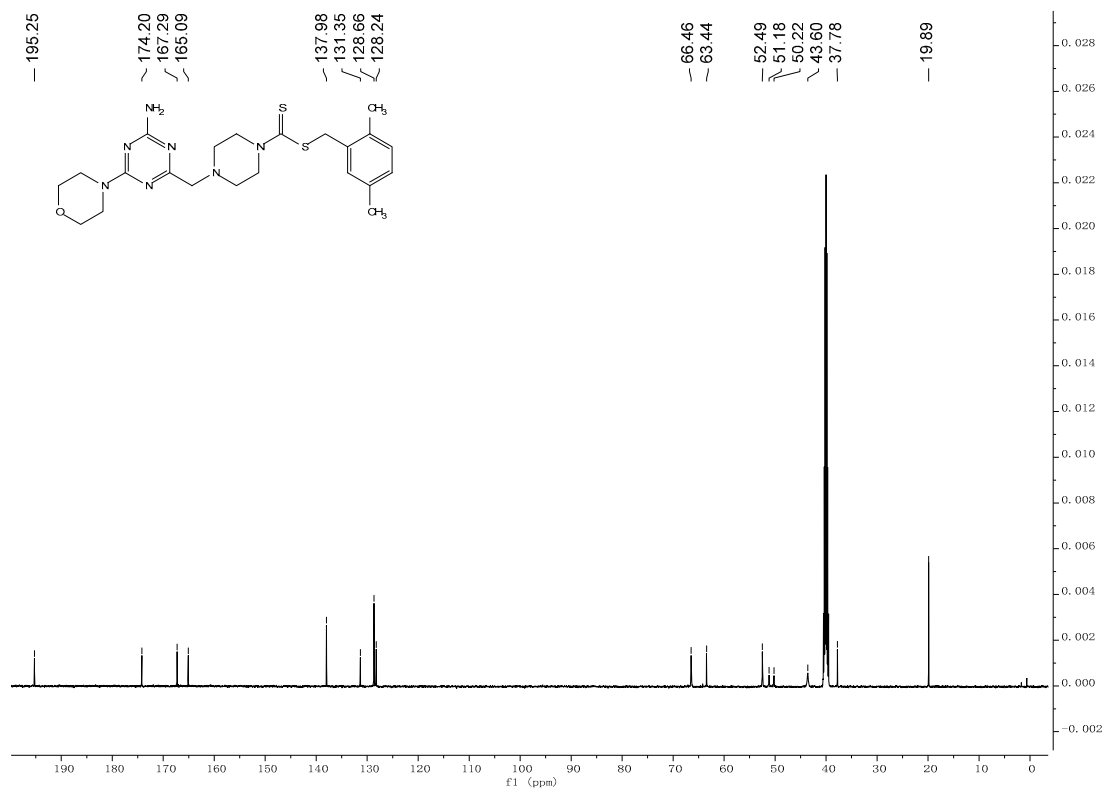

**Figure S100.** <sup>13</sup>C NMR (126 MHz, DMSO-*d*<sub>6</sub>) spectrum of compound C31.

104 #57 RT: 0.55 AV: 1 NL: 1.05E9  
T: FTMS + p ESI Full ms [100.0000-1300.0000]

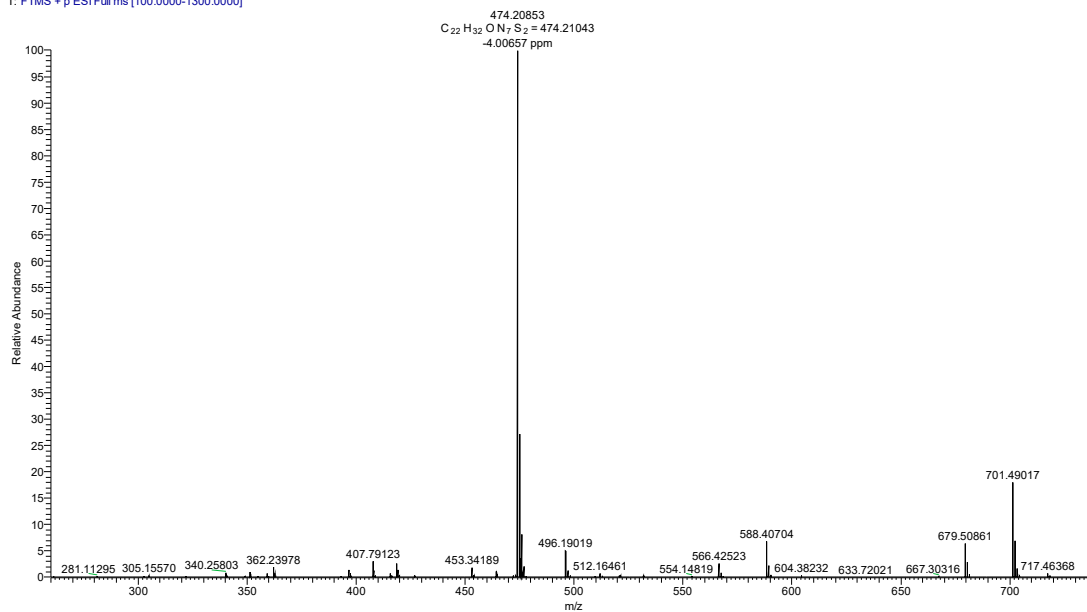

Figure S101. HRMS of compound C31.

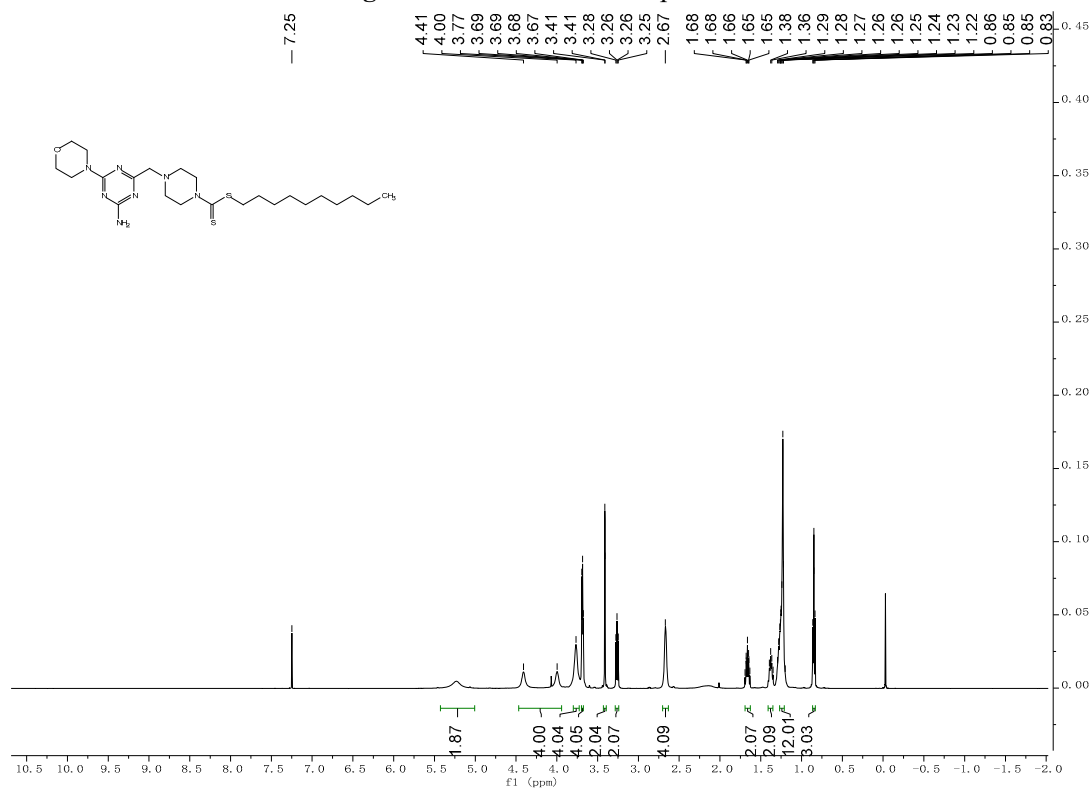

Figure S102. <sup>1</sup>H NMR (500 MHz, CDCl<sub>3</sub>) spectrum of compound C32.

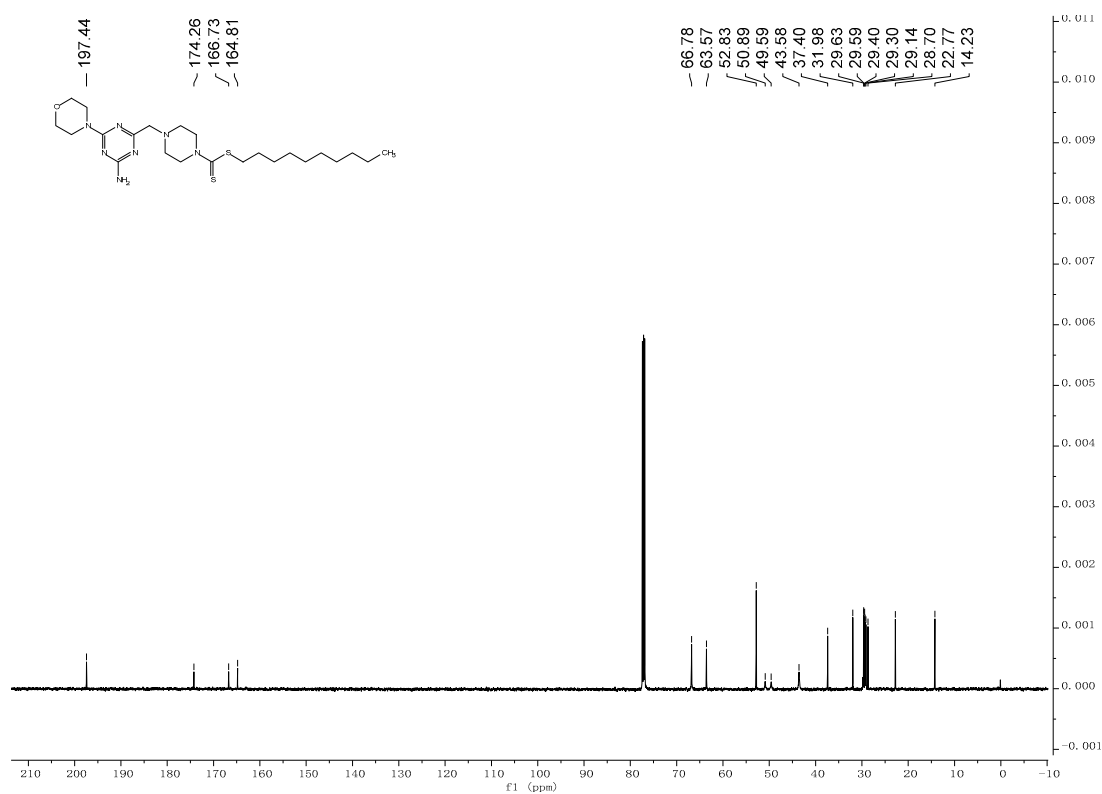

**Figure S103.** <sup>13</sup>C NMR (126 MHz, CDCl<sub>3</sub>) spectrum of compound C32.

99#139 RT: 1.34 AV: 1 NL: 3.56E8  
T: FTMS + p ESI Full ms [100.0000-1300.0000]

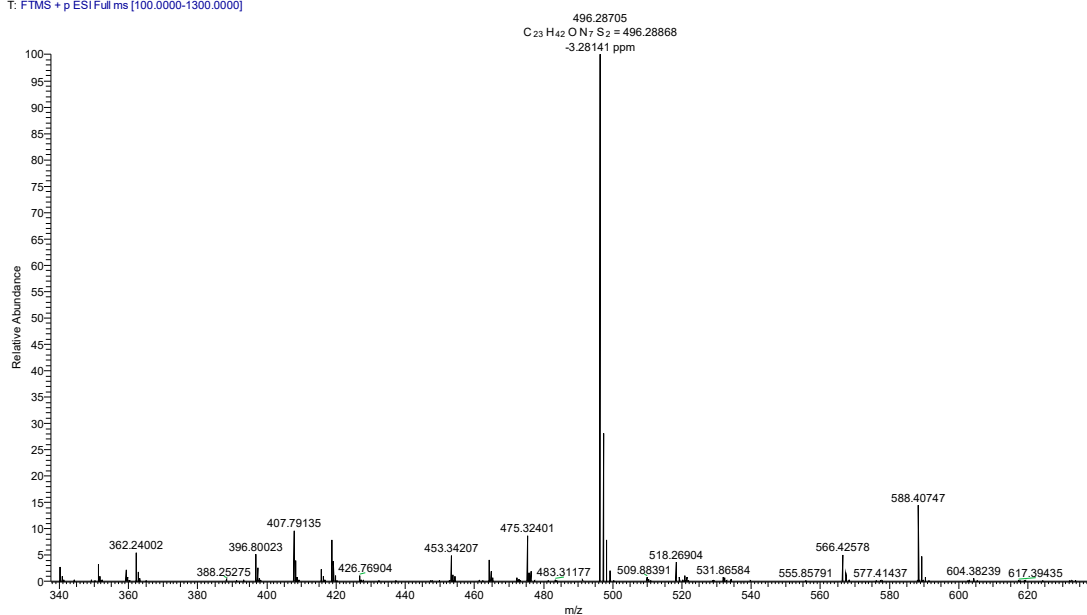

**Figure S104.** HRMS of compound C32.

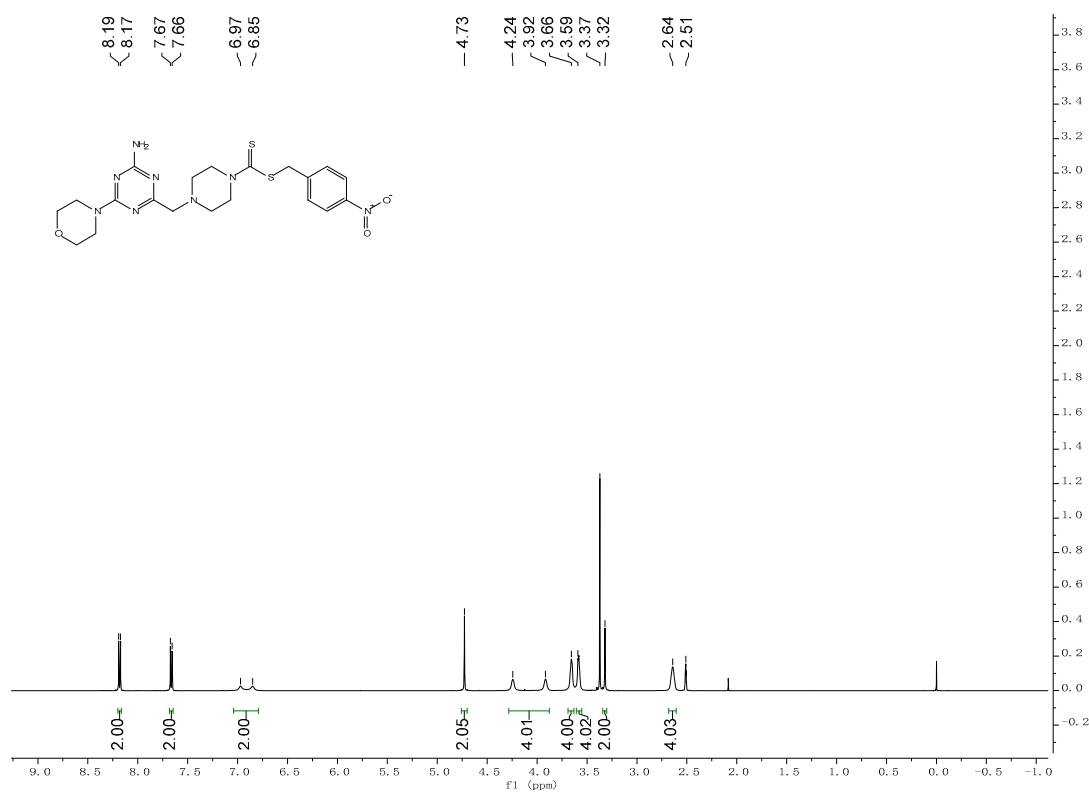

**Figure S105.** <sup>1</sup>H NMR (500 MHz, DMSO-*d*<sub>6</sub>) spectrum of compound C33.

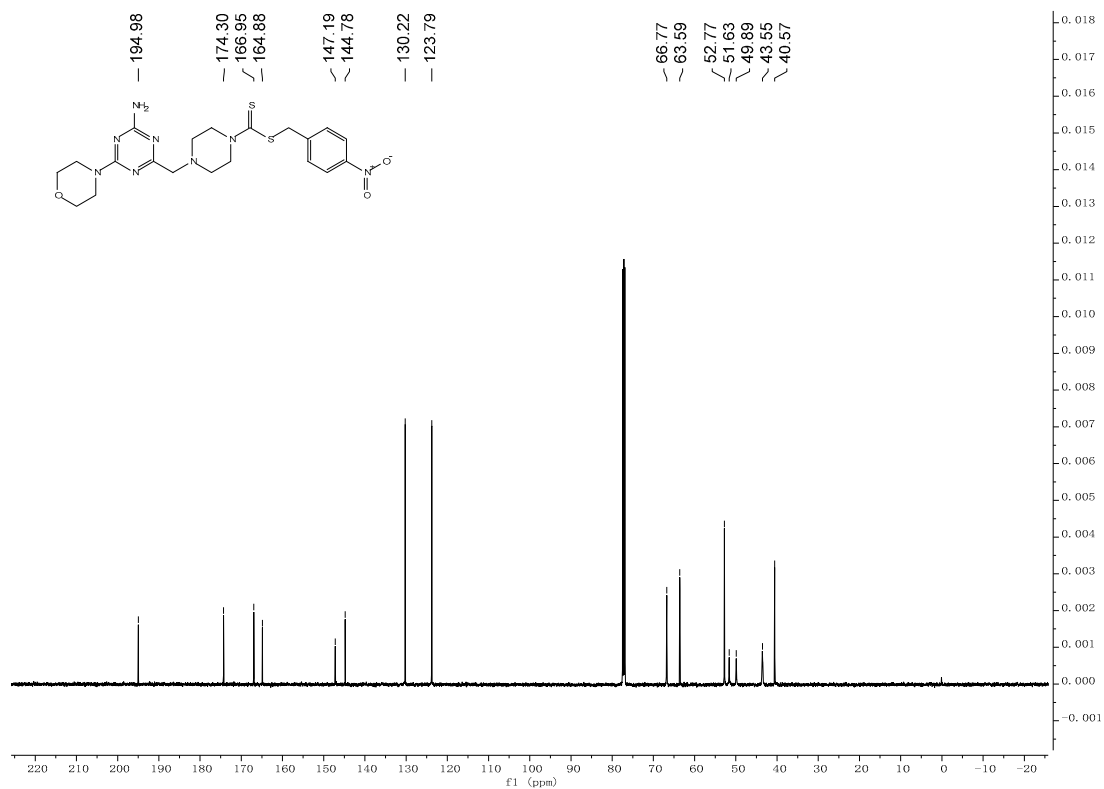

**Figure S106.** <sup>13</sup>C NMR (126 MHz, CDCl<sub>3</sub>) spectrum of compound C33.

102 #41 RT: 0.40 AV: 1 NL: 8.91E8  
T: FTMS + p ESI Full ms [100.0000-1300.0000]

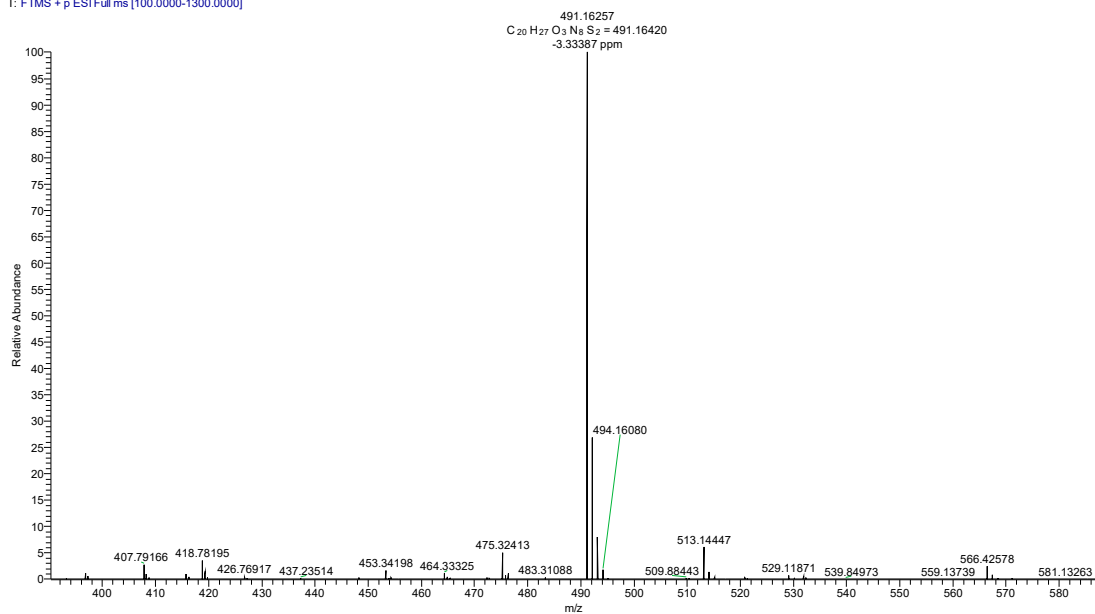

Figure S107. HRMS of compound C33.

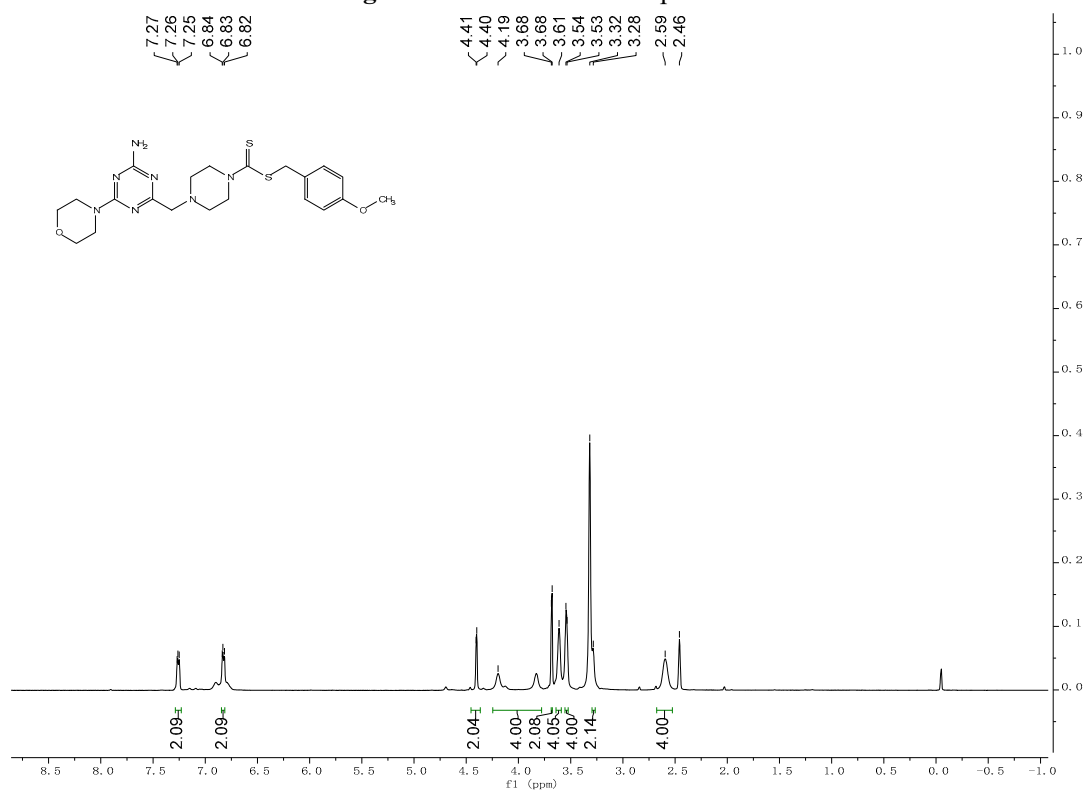

Figure S108. <sup>1</sup>H NMR (500 MHz, DMSO-*d*<sub>6</sub>) spectrum of compound C34.

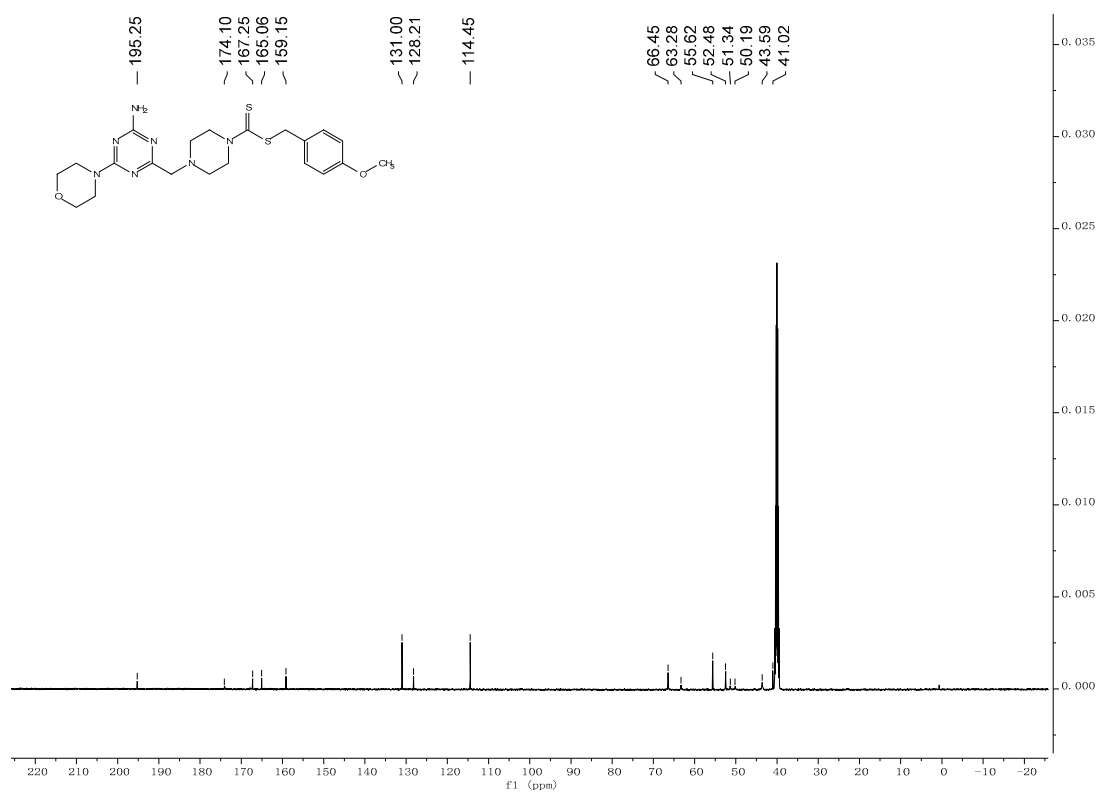

**Figure S109.** <sup>13</sup>C NMR (126 MHz, DMSO-d<sub>6</sub>) spectrum of compound C34.

103 #45 RT: 0.44 AV: 1 NL: 8.66E8  
T: FTMS + p ESI Full ms [100.0000-1300.0000]

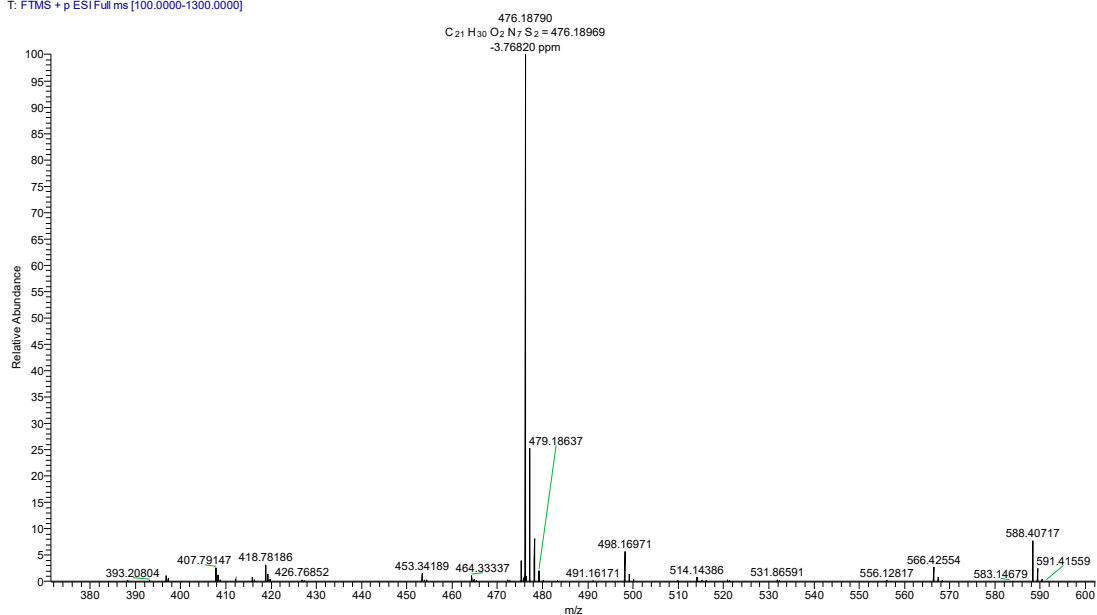

**Figure S110.** HRMS of compound C34.

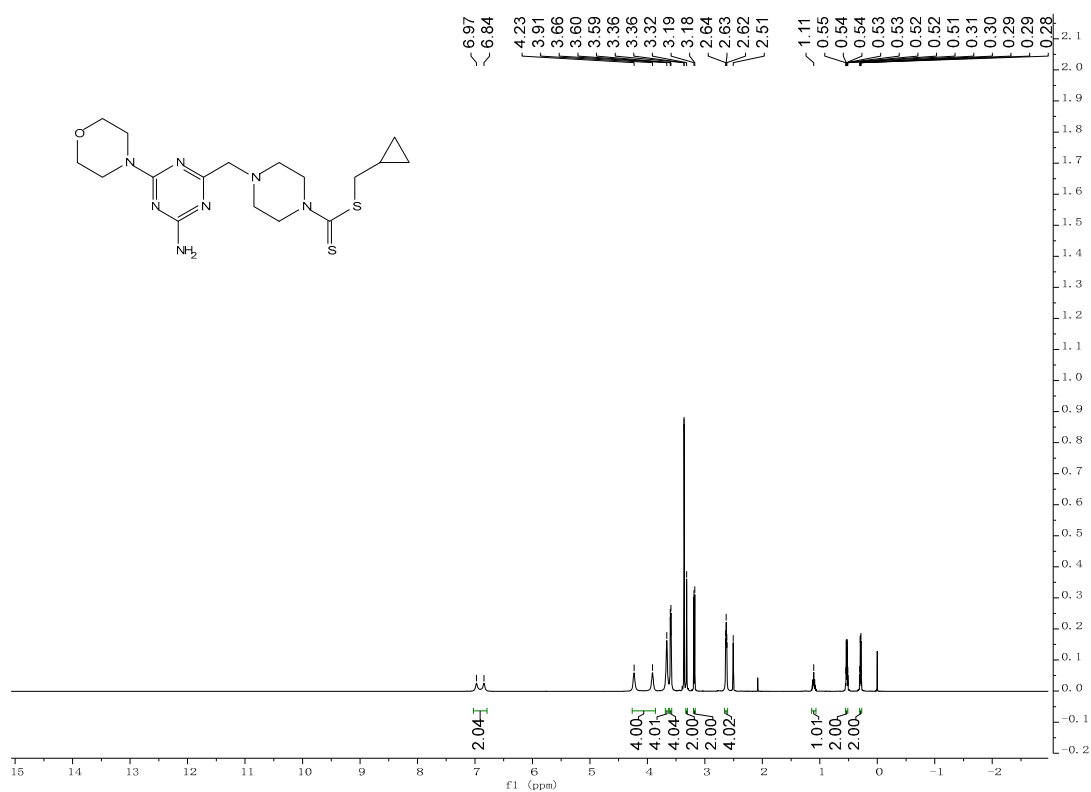

**Figure S111.** <sup>1</sup>H NMR (500 MHz, DMSO-*d*<sub>6</sub>) spectrum of compound C35.

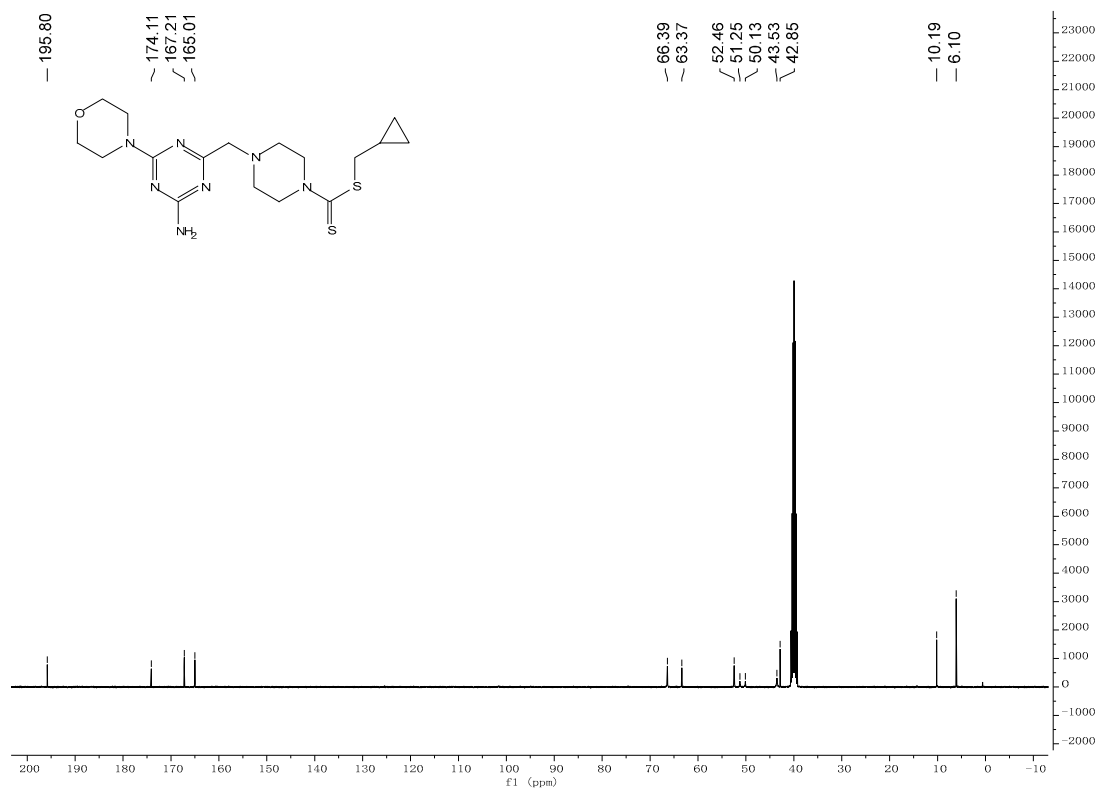

**Figure S112.** <sup>13</sup>C NMR (126 MHz, DMSO-*d*<sub>6</sub>) spectrum of compound C35.

98 #43 RT: 0.42 AV: 1 NL: 1.41E9  
T: FTMS + p ESI Full ms [100.0000-1300.0000]

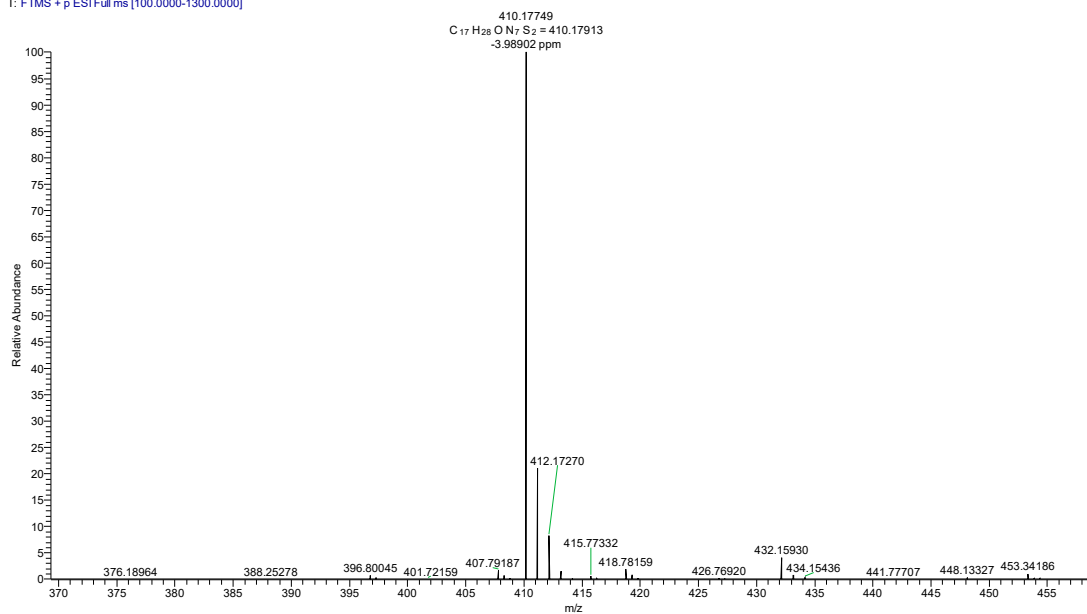

**Figure S113.** HRMS of compound C35.
